# Supplementary material for: Overexpression of GmGAMYB Accelerates the Transition to Flowering and Increases Plant Height in Soybean
Source: PubMed Central journal article supplement (PMC8141843; doi:10.3389/fpls.2021.667242), 2021-05-10
Supplement: Data_Sheet_2.pdf [file Data_Sheet_2.pdf]

Supplementary **Figure 1**. Staining of organs of *proGmGAMYB::GUS Arabidopsis*. The stem leaves, inflorescence, rosette leaves and roots of 30-day-old *proGmGAMYB::GUS Arabidopsis* plants were placed into X-Gluc staining solution. Took photos after decoloring.

Supplementary **Figure 2**. Molecular identification of *GmGAMYB-ox* transgenic soybean. (A) Identification of *GmGAMYB-ox* transgenic soybean by PCR analysis. (B) The expression levels of *GmGAMYB* were quantified by qRT-PCR analysis in transgenic soybean and WT plants. *GmActin4* gene was used for normalization. For each experiment, three technical replicates were conducted. Data shown are mean  $\pm$  SD of three independent experiments (\*\*P < 0.01, Student's t-test).

**Table S1. Plant *GAMYB* genes' information.**

| Gene name | Accession number   |
|-----------|--------------------|
| GmGAMYB   | KC525897           |
| MpMYB33   | RDX95167.1         |
| SsGAMYB   | TKY68413.1         |
| CcMYB33   | XP_020219565.1     |
| VuMYB33   | XP_027909434.1     |
| VaGAMYB   | XP_017431637.1     |
| LaGAMYB   | XP_019449331.1     |
| AtMYB65   | NP_001327042.1     |
| AtMYB33   | sp Q8W1W6.1        |
| OsGAMYB   | LOC_Os01g59660.1   |
| ZmGAMYB   | NP_001130632.1     |
| VvGAMYB   | CBI40642.3         |
| MeGAMYB   | Manes.04G153700.1  |
| SIGAMYB   | Solyc01g009070.2.1 |
| CsGAMYB   | Cucsa.364400.1     |
| HvGAMYB   | HORVU3Hr1G079490.4 |
| MtMYB33   | XP_013445158.1     |
| PtrMYB157 | Potri.003G189700.1 |
| RcGAMYB   | 29686.m000890      |

**Table S2. The specific sequences of the primers.**

| Primer                  | Sequence (5'-3')                        |
|-------------------------|-----------------------------------------|
| <i>GmGAMYB-3F6H-F</i>   | TGGAGCTCGGTACCCATGAAGAAAGATATTGAAGATG   |
| <i>GmGAMYB-3F6H-R</i>   | GATCCTGGGATCCCCGAGAGGGGCTGGAATGGATTTTCA |
| <i>GmGAMYB-TOPO-F</i>   | CACCATGAAGAAAGATATTGAAGATG              |
| <i>GmGAMYB-TOPO-R</i>   | GAGGGGCTGGAATGGATTTTCA                  |
| <i>proGmGAMYB-GUS-F</i> | CACCATAAGTAACGAGGCAGTGTAAT              |
| <i>proGmGAMYB-GUS-R</i> | AACAAGAACGAACGCTAGAAAC                  |
| <i>qGmGAMYB-F</i>       | GCGGCTGATTGCTGAACTT                     |
| <i>qGmGAMYB -R</i>      | GTGCTTTGGCTATGCTGAC                     |
| <i>qGmGA20ox-F</i>      | GATAGAGAGACCCTGTGCCT                    |
| <i>qGmGA20ox-R</i>      | TGAGAAGCAGAGCAAAACAGAG                  |
| <i>qGmFULc-F</i>        | GAAAACATTCCCTTCGGTTGAA                  |
| <i>qGmFULc-R</i>        | TGATGATGAAGACTGATTTCGCT                 |
| <i>qGmFUL1a-F</i>       | AAAAATTCATAGACGGTGTCGC                  |
| <i>qGmFUL1a-R</i>       | GGACAATTGGTAGTTTTTGGCT                  |
| <i>qGmFUL2b-F</i>       | GCTTGTGATAGATTCAGCACAG                  |
| <i>qGmFUL2b-R</i>       | CCTGCTTTGTTGCTAGTACATC                  |
| <i>qGmTCP8-F</i>        | ATTTGCACGTAGTCCAATAACG                  |
| <i>qGmTCP8-R</i>        | CAGCTTGTTCTTTCACACGTAA                  |
| <i>qGmTCP12-F</i>       | CTTCGATCAATTCACATGCGAT                  |
| <i>qGmTCP12-R</i>       | TTGTTGTTGGAAGTAGAGGGTT                  |
| <i>qGmFPF1-F</i>        | CAAGGAAACCCATCTTTCTGTG                  |
| <i>qGmFPF1-R</i>        | CAATCGTGAATTGCTAGAGCTC                  |
| <i>qGmActin4 -F</i>     | GTGTCAGCCATACTGTCCCCATTT                |
| <i>qGmActin4-R</i>      | GTTTCAAGCTCTTGCTCGTAATCA                |
| <i>GmGBP1-TOPO-F</i>    | CACCATGGCCACTCTGAAAGAGCTTC              |
| <i>GmGBP1-TOPO-R</i>    | GAATGCCCTCTTTCAAATCCAATGC               |
