# Supplementary material for: Overexpression of GmGAMYB Accelerates the Transition to Flowering and Increases Plant Height in Soybean
Source: Front Plant Sci. 2021 May 10;12:667242. doi: 10.3389/fpls.2021.667242 (PMC8141843; doi:10.3389/fpls.2021.667242)
Supplement: Supplementary file 1 [file Data_Sheet_1.xlsx]

## Sheet: Sheet1
Supplemental Data Set 1. Differentially Expressed Genes between GmGAMYB-ox-1 and the Wild Type Using RNA-Seq.
Gene ID	Type	log2 FC	Qvalue	Pvalue	Annotation
GLYMA_15G084700	mRNA	1.11402	1.66556e-06	6.21263e-07	pentatricopeptide repeat-containing protein DOT4, chloroplastic
GLYMA_16G143400	mRNA	-2.70839	1.6392e-18	3.42143e-19	uncharacterized LOC100790666
GLYMA_18G190200	mRNA	-3.17687	3.47039e-40	4.32912e-41	tau class glutathione S-transferase
GLYMA_14G101100	mRNA	-3.89789	2.11137e-43	2.48874e-44	probable folate-biopterin transporter 6
GLYMA_06G036300	mRNA	-1.27345	5.64463e-58	5.36682e-59	serpin-ZX
GLYMA_12G197400	mRNA	-2.28658	7.40649e-09	2.34867e-09	terpene synthase 14
GLYMA_14G215800	mRNA	-2.79744	9.01314e-199	2.94908e-200	probable calcium-binding protein CML18
GLYMA_06G275000	mRNA	2.32332	4.91751e-17	1.08178e-17	disease resistance protein TAO1
GLYMA_15G088600	mRNA	-1.14571	8.95918e-10	2.69374e-10	floral homeotic protein AGAMOUS
GLYMA_13G359200	mRNA	2.0768	5.39819e-10	1.60216e-10	uncharacterized LOC100792375
GLYMA_09G082900	mRNA	-1.67089	1.19547e-21	2.25404e-22	UDP-glycosyltransferase 43
GLYMA_14G179200	mRNA	-1.49995	5.32227e-21	1.02411e-21	putative alpha/beta hydrolase
GLYMA_17G245100	mRNA	-5.07721	1.47896e-16	3.30736e-17	uncharacterized LOC100775571
GLYMA_11G032200	mRNA	-1.78715	2.10378e-89	1.4094e-90	probable aspartyl protease At4g16563
GLYMA_13G270600	mRNA	1.16626	4.17592e-50	4.42357e-51	14-3-3 protein SGF14p
GLYMA_19G215100	mRNA	-1.16955	5.13975e-83	3.63531e-84	dnaJ protein ERDJ3B
GLYMA_06G220700	mRNA	-4.13436	2.95283e-23	5.32033e-24	cucumber peeling cupredoxin
GLYMA_06G193000	mRNA	1.1663	5.83401e-28	9.34555e-29	transcription factor TCP14
GLYMA_08G356800	mRNA	5.59743	0	0	probable pectate lyase 8
GLYMA_11G067200	mRNA	2.2402	0.000149277	6.66505e-05	proline-rich receptor-like protein kinase PERK4
GLYMA_08G333000	mRNA	1.01081	7.74982e-10	2.32019e-10	peptidyl-prolyl cis-trans isomerase FKBP16-1, chloroplastic
GLYMA_03G210500	mRNA	-2.16599	2.34872e-55	2.3119e-56	monothiol glutaredoxin-S6
GLYMA_07G140800	mRNA	-1.73736	8.66185e-09	2.75868e-09	adenine nucleotide alpha hydrolases superfamily protein
GLYMA_10G017600	mRNA	-1.89309	1.38357e-225	3.99887e-227	uncharacterized LOC100306369
GLYMA_12G029100	mRNA	-1.10946	1.6358e-68	1.36663e-69	uncharacterized LOC100306367
GLYMA_07G015600	mRNA	-1.91253	2.89891e-10	8.48252e-11	histidine-containing phosphotransfer protein 4-like
GLYMA_10G186800	mRNA	-1.85518	5.96508e-15	1.4108e-15	ethylene-responsive transcription factor 1B
GLYMA_03G131000	mRNA	-1.58676	8.2714e-202	2.6703e-203	calmodulin binding protein PICBP
GLYMA_06G313800	mRNA	1.96751	1.50517e-05	6.08184e-06	uncharacterized LOC100807935
GLYMA_16G026900	mRNA	-1.57508	6.86901e-160	2.73824e-161	jasmonic acid-amido synthetase JAR1
GLYMA_08G062600	mRNA	-1.44786	4.84796e-46	5.47519e-47	sulfite exporter TauE/SafE family protein 2
GLYMA_09G236500	mRNA	1.61251	1.7596e-38	2.26074e-39	1,4-dihydroxy-2-naphthoyl-CoA thioesterase 1
GLYMA_11G185100	mRNA	5.34222	2.80369e-20	5.51794e-21	fatty acyl-CoA reductase 3
GLYMA_13G249600	mRNA	1.23021	9.04271e-05	3.94415e-05	quinone reductase family protein
GLYMA_16G090000	mRNA	-1.17761	2.92451e-184	1.02707e-185	cytochrome P450 CYP82D47
GLYMA_10G1615002	mRNA	-6.67668	9.70334e-13	2.52406e-13	uncharacterized LOC100500690
GLYMA_19G224600	mRNA	1.79315	0.00014221	6.33536e-05	transcription factor MYB61
GLYMA_03G258800	mRNA	-1.19788	6.64172e-16	1.52194e-16	dof zinc finger protein DOF2.5
GLYMA_U021000	mRNA	-1.06385	4.40618e-127	2.16134e-128	uncharacterized LOC100788977
GLYMA_16G076400	mRNA	-2.69103	2.71056e-16	6.12249e-17	uncharacterized LOC100500694
GLYMA_15G062500	mRNA	-2.27923	4.81542e-149	2.03252e-150	pathogenesis-related protein 1
GLYMA_06G134000	mRNA	-1.20184	4.29065e-21	8.22916e-22	SAUR-like auxin-responsive family protein
GLYMA_14G007200	mRNA	-1.85594	6.6807e-10	1.9941e-10	uncharacterized LOC102660889
GLYMA_12G234300	mRNA	-1.2321	9.60172e-219	2.85892e-220	trifunctional UDP-glucose 4,6-dehydratase/UDP-4-keto-6-deoxy-D-glucose 3,5-epimerase/UDP-4-keto-L-rhamnose-reductase RHM1
GLYMA_18G283200	mRNA	-1.48383	2.6859e-100	1.61923e-101	putative disease resistance RPP13-like protein 3
GLYMA_20G100900	mRNA	1.56622	1.09662e-08	3.51607e-09	protein ASPARTIC PROTEASE IN GUARD CELL 2
GLYMA_05G228200	mRNA	-1.07955	2.51172e-22	4.65225e-23	probable glycosyltransferase At5g03795
GLYMA_16G042900	mRNA	-2.43551	5.37038e-48	5.86166e-49	NAC domain-containing protein 87
GLYMA_20G080700	mRNA	-2.41364	2.33685e-34	3.26808e-35	receptor-like protein EIX2
GLYMA_11G193400	mRNA	-1.04637	2.0923e-05	8.56089e-06	uncharacterized LOC100804513
GLYMA_13G133100	mRNA	-1.54739	0.000476014	0.000224658	C2H2-type zinc finger protein
GLYMA_07G023300	mRNA	-2.7846	1.41656e-163	5.50788e-165	probable WRKY transcription factor 40
GLYMA_15G112900	mRNA	-1.84817	2.99812e-121	1.52542e-122	ubiquinol oxidase 4, chloroplastic/chromoplastic
GLYMA_02G135400	mRNA	1.10894	4.13567e-83	2.924e-84	transcription factor HHO5
GLYMA_11G051800	mRNA	-5.72115	9.00518e-283	2.12147e-284	cytochrome P450 81E8
GLYMA_04G062900	mRNA	-1.65626	2.08622e-10	6.05871e-11	protein PPLZ02
GLYMA_04G084900	mRNA	3.82516	6.34419e-07	2.29065e-07	GATA transcription factor 12
GLYMA_18G052500	mRNA	1.15982	2.62288e-06	9.93371e-07	transcription factor RF2b
GLYMA_20G234200	mRNA	3.38222	5.86803e-07	2.11289e-07	microtubule-binding protein TANGLED
GLYMA_01G210800	mRNA	1.28883	1.27756e-12	3.34065e-13	uncharacterized LOC100526858
GLYMA_06G294100	mRNA	-1.00686	0	0	protein ACCELERATED CELL DEATH 6
GLYMA_06G029200	mRNA	2.06671	0.000251882	0.000115162	BEL1-like homeodomain protein 11
GLYMA_08G247700	mRNA	-1.4907	5.29023e-32	7.78352e-33	putative methylesterase
GLYMA_03G234400	mRNA	-1.17307	4.14771e-270	1.01671e-271	bifunctional epoxide hydrolase 2-like
GLYMA_09G241900	mRNA	1.46043	2.80819e-18	5.91729e-19	uncharacterized LOC102664801
GLYMA_09G073400	mRNA	3.96718	1.11361e-07	3.80101e-08	auxin-responsive protein SAUR78
GLYMA_11G230400	mRNA	-2.22834	4.71577e-21	9.05866e-22	putative serine/threonine-protein kinase-like protein CCR3
GLYMA_17G066900	mRNA	2.39039	1.04484e-08	3.34635e-09	protein GLUTAMINE DUMPER 3
GLYMA_16G191000	mRNA	-2.79692	2.1852e-07	7.62125e-08	receptor-like protein EIX1
GLYMA_13G289100	mRNA	-1.64548	9.9139e-65	8.66098e-66	UDP-glycosyltransferase 79B30-like
GLYMA_10G163000	mRNA	1.04518	1.41033e-05	5.68556e-06	PRA1 family protein E
GLYMA_17G015500	mRNA	2.3542	7.16039e-27	1.17963e-27	glucose-6-phosphate/phosphate translocator 2, chloroplastic
GLYMA_11G190600	mRNA	2.57541	4.30792e-36	5.80614e-37	GDSL esterase/lipase At5g22810
GLYMA_20G186200	mRNA	-1.18001	1.05793e-15	2.44298e-16	AP2/ERF and B3 domain-containing transcription repressor RAV2
GLYMA_13G005100	mRNA	-3.30692	1.37925e-82	9.78543e-84	VQ motif-containing protein 22
GLYMA_19G091300	mRNA	1.73746	3.40654e-32	4.99162e-33	uncharacterized LOC102662543
GLYMA_12G049300	mRNA	-3.05272	5.24768e-26	8.8284e-27	uncharacterized LOC100526891
GLYMA_14G177600	mRNA	-2.14545	9.19656e-118	4.80955e-119	putative phytocyanin
GLYMA_09G036800	mRNA	-1.53835	3.3699e-41	4.12015e-42	uncharacterized LOC100526890
GLYMA_02G088900	mRNA	-1.43709	0	0	alpha-amylase inhibitor/lipid transfer/seed storage family protein
GLYMA_14G085200	mRNA	1.43403	3.28626e-161	1.30196e-162	kinesin-like protein KIN-4A
GLYMA_18G266200	mRNA	1.98654	1.91738e-16	4.3079e-17	histone H3.2
GLYMA_05G148700	mRNA	1.25921	3.29952e-11	9.18467e-12	MADS-box protein FLOWERING LOCUS C
GLYMA_05G197900	mRNA	1.13408	1.94339e-06	7.28445e-07	patellin-3-like
GLYMA_05G204600	mRNA	-1.95586	0	0	protein P21-like
GLYMA_09G285900	mRNA	-1.31313	3.7726e-61	3.43778e-62	probable uridine nucleosidase 2
GLYMA_20G190800	mRNA	-1.18499	1.1501e-47	1.26377e-48	cyclin-dependent protein kinase inhibitor SMR1
GLYMA_07G083300	mRNA	-1.02865	4.88322e-82	3.4845e-83	cytochrome P450 704C1
GLYMA_07G122300	mRNA	1.08848	7.2137e-12	1.94529e-12	tRNA (guanine-N(7)-)-methyltransferase
GLYMA_08G289900	mRNA	-1.58302	0.000315551	0.000145954	gluconokinase
GLYMA_16G153500	mRNA	-1.27593	1.95932e-11	5.39474e-12	uncharacterized LOC100526886
GLYMA_07G185200	mRNA	-3.44786	3.45779e-07	1.2243e-07	protein FW2.2-like 6
GLYMA_08G104600	mRNA	-1.3248	1.2336e-84	8.61754e-86	probable methyltransferase At1g27930
GLYMA_13G283600	mRNA	-2.84018	0	0	calcium-binding protein PBP1-like protein
GLYMA_18G282500	mRNA	1.39039	9.82028e-05	4.30378e-05	protein LAX PANICLE 2
GLYMA_08G155000	mRNA	-1.39981	1.21692e-48	1.31862e-49	uncharacterized LOC100820089
GLYMA_13G031600	mRNA	-1.73736	8.66185e-09	2.75868e-09	amino acid permease 3
GLYMA_12G111200.1	mRNA	3.95586	4.20154e-27	6.87941e-28	expansin-B3-like
GLYMA_12G228800	mRNA	1.12689	4.18778e-96	2.62628e-97	TPR repeat-containing thioredoxin TTL1
GLYMA_02G156000	mRNA	-2.45603	3.95153e-09	1.23195e-09	cytochrome P450 71D8-like
GLYMA_02G309000	mRNA	-1.84018	1.09617e-11	2.97872e-12	uncharacterized LOC100806244
GLYMA_12G220600	mRNA	-1.65135	4.46799e-13	1.1431e-13	uncharacterized LOC100804520
GLYMA_15G013900	mRNA	-1.50513	4.38762e-15	1.03317e-15	coatomer subunit beta'-2
GLYMA_18G070800	mRNA	-1.39539	4.28697e-09	1.33898e-09	uncharacterized LOC100806243
GLYMA_13G008500	mRNA	1.25258	3.41414e-05	1.42793e-05	uncharacterized LOC100789038
GLYMA_18G268900	mRNA	1.77453	2.2376e-21	4.24945e-22	protein LONGIFOLIA 1
GLYMA_08G224000	mRNA	-1.1206	1.27967e-78	9.46973e-80	uncharacterized membrane protein At1g16860
GLYMA_07G252400	mRNA	-2.92035	3.25929e-13	8.28976e-14	ankyrin repeat-containing protein
GLYMA_19G140800	mRNA	-1.16224	8.46542e-87	5.81904e-88	calcium-dependent protein kinase 32
GLYMA_09G281800	mRNA	-6.8168	3.89569e-128	1.89075e-129	isoliquiritigenin 2'-O-methyltransferase
GLYMA_03G011700.1	mRNA	-2.11082	2.10536e-05	8.61864e-06	uncharacterized LOC106794103
GLYMA_08G326200	mRNA	-1.16529	2.77116e-192	9.31653e-194	ABC transporter C family member 3
GLYMA_16G017200	mRNA	-1.50209	1.73736e-37	2.27574e-38	soluble inorganic pyrophosphatase 1
GLYMA_10G083700	mRNA	-1.06854	2.16711e-33	3.08507e-34	uncharacterized LOC100798284
GLYMA_18G042200	mRNA	2.3092	1.358e-170	5.07652e-172	receptor protein kinase TMK1
GLYMA_11G238300	mRNA	-1.98035	0.000664526	0.000319434	aminotransferase superfamily protein
GLYMA_17G128400	mRNA	-1.08889	1.6817e-77	1.25686e-78	nucleolar protein 56
GLYMA_08G044300	mRNA	-3.18702	8.0575e-66	6.9579e-67	LEAF RUST 10 DISEASE-RESISTANCE LOCUS RECEPTOR-LIKE PROTEIN KINASE-like 2.1
GLYMA_01G095300	mRNA	5.28911	1.01161e-05	4.02546e-06	RING-H2 finger protein ATL29
GLYMA_19G243100	mRNA	-2.00245	4.47203e-06	1.7265e-06	uncharacterized LOC100780249
GLYMA_08G013200	mRNA	1.15229	1.19612e-18	2.48584e-19	probable LRR receptor-like serine/threonine-protein kinase At1g63430
GLYMA_01G240100	mRNA	-1.60398	3.2806e-09	1.01786e-09	homeobox-leucine zipper protein MERISTEM L1
GLYMA_15G075200	mRNA	-1.14267	2.79569e-141	1.24558e-142	VQ motif-containing protein
GLYMA_16G218200	mRNA	-1.11624	6.25757e-25	1.07936e-25	probable cyclic nucleotide-gated ion channel 20, chloroplastic
GLYMA_08G256100	mRNA	-1.17953	2.16214e-39	2.72957e-40	protein YIF1A
GLYMA_16G128800	mRNA	2.73271	3.45709e-06	1.32147e-06	uncharacterized LOC100799995
GLYMA_13G033400	mRNA	-2.54594	0	0	LEAF RUST 10 DISEASE-RESISTANCE LOCUS RECEPTOR-LIKE PROTEIN KINASE-like 2.5
GLYMA_19G087200	mRNA	-2.22547	7.57181e-09	2.40306e-09	mitochondrial pyruvate carrier 1
GLYMA_01G084800	mRNA	-2.07862	1.7906e-29	2.7761e-30	lysine histidine transporter-like 6
GLYMA_03G021600	mRNA	-1.05809	6.10075e-06	2.38174e-06	cytochrome P450 704C1
GLYMA_08G157800	mRNA	-1.15493	1.141e-102	6.71998e-104	GTP 3',8-cyclase, mitochondrial
GLYMA_10G070900	mRNA	-1.47188	6.64464e-206	2.11433e-207	zinc finger A20 and AN1 domain-containing stress-associated protein 4
GLYMA_16G127900	mRNA	-1.06226	2.85487e-09	8.82187e-10	TMV resistance protein N-like
GLYMA_05G192300	mRNA	-2.10057	2.30491e-13	5.81899e-14	proline-rich extensin-like protein EPR1
GLYMA_05G037200	mRNA	1.03131	0.00097745	0.000479703	serine/threonine-protein kinase HT1
GLYMA_11G031500	mRNA	-1.04712	1.6927e-21	3.20493e-22	protein NRT1/ PTR FAMILY 6.3
GLYMA_19G118000	mRNA	-1.00212	4.47661e-08	1.48647e-08	zf-Dof domain-containing protein
GLYMA_10G203500	mRNA	-3.76618	4.59199e-28	7.34218e-29	geraniol 8-hydroxylase
GLYMA_19G045400	mRNA	3.60689	1.25438e-137	5.71182e-139	uncharacterized LOC100780261
GLYMA_12G229000	mRNA	-1.8822	1.93094e-21	3.66022e-22	AAA-ATPase At3g50940
GLYMA_12G120200	mRNA	1.87972	3.42874e-07	1.21354e-07	UDP-glycosyltransferase 79B30-like
GLYMA_20G135200	mRNA	-1.53949	1.02893e-246	2.72138e-248	cysteine-rich and transmembrane domain-containing protein WIH2
GLYMA_17G173800	mRNA	2.75145	1.92405e-10	5.57987e-11	uncharacterized LOC100815520
GLYMA_20G056900	mRNA	3.77453	0.000715995	0.000345366	nucleobase-ascorbate transporter 1
GLYMA_03G032800	mRNA	-2.69512	1.6425e-60	1.51284e-61	UDP-glycosyltransferase 72D1
GLYMA_02G252200	mRNA	1.48175	1.3623e-33	1.92859e-34	cucumisin
GLYMA_03G021300	mRNA	1.26733	6.34817e-14	1.56614e-14	transmembrane protein 45A
GLYMA_12G186200	mRNA	-4.0428	7.11524e-32	1.05036e-32	NAC domain-containing protein 90
GLYMA_02G300500	mRNA	-6.77429	7.5456e-26	1.27519e-26	nudix hydrolase 10
GLYMA_12G014200	mRNA	-1.97473	0	0	probable tocopherol O-methyltransferase, chloroplastic
GLYMA_03G019500	mRNA	-1.22922	1.05152e-09	3.17249e-10	uncharacterized LOC100813775
GLYMA_15G206100	mRNA	-1.64638	2.61476e-190	8.91192e-192	calmodulin-binding protein 60 E
GLYMA_04G147000	mRNA	-2.1733	7.46834e-24	1.32567e-24	EIN3-binding F-box protein 1
GLYMA_13G312800	mRNA	-2.69579	0.000592485	0.000282761	E3 ubiquitin-protein ligase PUB23-like
GLYMA_10G091800	mRNA	2.18662	6.14825e-20	1.22445e-20	FT-interacting protein 1
GLYMA_06G025300	mRNA	2.89792	8.62441e-11	2.45575e-11	auxin-responsive protein SAUR50
GLYMA_05G121900	mRNA	-7.14135	9.86058e-17	2.19097e-17	WAT1-related protein At1g68170
GLYMA_20G131500	mRNA	-2.87732	1.02405e-279	2.43762e-281	probable protein phosphatase 2C 63
GLYMA_20G149500	mRNA	-1.60638	5.33479e-60	4.93259e-61	leucine-rich repeat extensin-like protein 6
GLYMA_03G215800	mRNA	-6.46188	3.17008e-122	1.60254e-123	probable pectinesterase/pectinesterase inhibitor 41
GLYMA_15G065200	mRNA	-2.85975	2.00895e-37	2.63368e-38	G-type lectin S-receptor-like serine/threonine-protein kinase B120
GLYMA_05G021900	mRNA	-1.2747	3.69354e-191	1.25082e-192	flavonoid 3'-monooxygenase
GLYMA_05G042300	mRNA	-4.8908	7.86172e-08	2.65273e-08	manganese-dependent ADP-ribose/CDP-alcohol diphosphatase
GLYMA_06G142500	mRNA	1.42961	2.64175e-63	2.34751e-64	probably inactive leucine-rich repeat receptor-like protein kinase At3g28040-like
GLYMA_06G079500	mRNA	-2.90239	0	0	uncharacterized LOC100780305
GLYMA_20G030700	mRNA	-1.75529	0.000517988	0.000245492	uncharacterized LOC100792361
GLYMA_14G175800	mRNA	1.26486	1.55493e-10	4.48522e-11	7-deoxyloganetin glucosyltransferase
GLYMA_12G108900	mRNA	-1.32655	8.15461e-28	1.31074e-28	indole-3-acetic acid-amido synthetase GH3.10
GLYMA_14G017000	mRNA	-1.21804	3.83131e-18	8.11288e-19	pirin-like protein
GLYMA_01G024000	mRNA	-1.51454	0	0	mitochondrial uncoupling protein 5
GLYMA_01G183300	mRNA	-1.85577	2.24273e-187	7.76625e-189	probable disease resistance protein At5g66900
GLYMA_01G181800	mRNA	-1.98702	0.000243415	0.000111131	cytochrome P450 CYP82D47
GLYMA_17G233200	mRNA	2.11402	0.000155917	6.98086e-05	kinesin-like protein KIN-7N
GLYMA_16G108900	mRNA	-3.52157	3.43081e-68	2.87562e-69	long-chain-alcohol oxidase FAO4A
GLYMA_11G242500	mRNA	-1.58741	0.00010495	4.61249e-05	RING-H2 finger protein ATL54
GLYMA_16G029400	mRNA	-1.54183	1.50137e-06	5.58299e-07	uncharacterized LOC100778582
GLYMA_20G120200	mRNA	-2.11916	1.62864e-110	9.02801e-112	LEAF RUST 10 DISEASE-RESISTANCE LOCUS RECEPTOR-LIKE PROTEIN KINASE-like 1.2
GLYMA_01G005600	mRNA	1.67119	2.89067e-09	8.93565e-10	leucine-rich repeat extensin-like protein 4-like
GLYMA_01G173800	mRNA	-2.31661	1.13527e-43	1.33105e-44	U-box domain-containing protein 5
GLYMA_06G068000	mRNA	-2.71354	1.22021e-17	2.63141e-18	uncharacterized LOC100790631
GLYMA_08G010500	mRNA	-2.16794	5.16942e-269	1.27139e-270	omega-hydroxypalmitate O-feruloyl transferase
GLYMA_05G130400	mRNA	1.11077	2.43207e-09	7.48486e-10	uncharacterized LOC100792354
GLYMA_18G013400	mRNA	-2.61778	4.06904e-08	1.34769e-08	uncharacterized LOC100807855
GLYMA_16G186500	mRNA	-2.09171	0.000899909	0.00043895	receptor-like protein EIX2
GLYMA_07G041400	mRNA	-1.92561	2.06094e-141	9.15972e-143	protein TIFY 11B-like
GLYMA_18G297100	mRNA	-1.24304	2.29981e-07	8.0382e-08	LOB domain-containing protein 41
GLYMA_03G137900	mRNA	-2.75803	9.9353e-196	3.3077e-197	probable galactinol--sucrose galactosyltransferase 2
GLYMA_14G164700	mRNA	1.3088	2.51024e-38	3.23542e-39	phosphatidylinositol 4-phosphate 5-kinase 1
GLYMA_07G109600	mRNA	3.31768	6.96012e-47	7.77143e-48	squamosa promoter-binding-like protein 8
GLYMA_13G298400	mRNA	-1.23185	2.30298e-21	4.37489e-22	bifunctional epoxide hydrolase 2
GLYMA_07G203700	mRNA	-5.05689	7.26513e-100	4.41554e-101	glutamate receptor 2.7
GLYMA_07G186700	mRNA	1.42661	0.000127427	5.65004e-05	kinesin-like protein KIN-14C
GLYMA_06G190400	mRNA	2.50323	4.86522e-05	2.06608e-05	mitochondrial outer membrane protein porin 1
GLYMA_19G029300	mRNA	-5.35475	7.7482e-06	3.05217e-06	UDP-glycosyltransferase 83A1
GLYMA_13G350300	mRNA	2.41888	3.01593e-13	7.66009e-14	protein HOTHEAD
GLYMA_16G183500	mRNA	-3.87907	1.0566e-37	1.37683e-38	receptor-like protein EIX2
GLYMA_13G364900	mRNA	-1.21321	0	0	phospholipase D alpha 1
GLYMA_01G0337001	mRNA	1.23277	6.8842e-07	2.49295e-07	WAT1-related protein At5g40210
GLYMA_14G181800	mRNA	1.98521	4.19014e-08	1.38906e-08	kinesin-like protein KIN-4C
GLYMA_10G267700	mRNA	-4.61424	2.42886e-93	1.57089e-94	protein DETOXIFICATION 12
GLYMA_16G182900	mRNA	-4.11859	9.52661e-05	4.16989e-05	receptor-like protein 43
GLYMA_19G113300	mRNA	-1.30235	3.51459e-44	4.08527e-45	probable glycosyltransferase At5g03795
GLYMA_02G042100	mRNA	-1.19776	4.47712e-26	7.51864e-27	isocitrate dehydrogenase [NAD] regulatory subunit 1, mitochondrial
GLYMA_12G021800	mRNA	1.30822	2.28494e-05	9.38585e-06	ubiquitin-conjugating enzyme E2
GLYMA_05G053800	mRNA	-1.41133	5.64211e-07	2.02808e-07	AT-hook motif nuclear-localized protein 1
GLYMA_03G224600	mRNA	2.17027	2.20869e-46	2.48301e-47	probable polygalacturonase-like
GLYMA_10G047700	mRNA	-1.34046	1.73082e-246	4.58722e-248	glutathione S-transferase L2
GLYMA_06G238400	mRNA	-1.26109	7.03517e-19	1.45077e-19	protein RICE SALT SENSITIVE 3
GLYMA_19G132800	mRNA	-1.16846	3.36483e-172	1.24501e-173	probable calcium-binding protein CML36
GLYMA_03G201500	mRNA	-5.8908	6.79685e-15	1.61104e-15	NDR1/HIN1-like protein 10
GLYMA_11G124200, GmVRN1-like	mRNA	-1.51825	3.67063e-09	1.14207e-09	B3 domain-containing transcription factor VRN1-like
GLYMA_03G248000	mRNA	-1.09949	5.12401e-82	3.65911e-83	protein WVD2-like 1
GLYMA_03G237300	mRNA	-2.07096	8.32052e-14	2.06612e-14	probable linoleate 9S-lipoxygenase 5
GLYMA_03G253400	mRNA	1.21686	6.24387e-27	1.02762e-27	uncharacterized LOC100815552
GLYMA_18G018400	mRNA	4.77453	0.000305213	0.000140926	putative ETHYLENE INSENSITIVE 3-like 4 protein
GLYMA_18G065100	mRNA	-1.38118	5.39765e-20	1.07158e-20	laccase-4
GLYMA_05G049300	mRNA	2.52177	1.52124e-07	5.24336e-08	scarecrow-like protein 28
GLYMA_11G211100	mRNA	-3.0964	2.82598e-125	1.40239e-126	probable leucine-rich repeat receptor-like protein kinase At5g49770
GLYMA_02G034000	mRNA	-2.67761	0	0	aldehyde dehydrogenase family 2 member B2
GLYMA_13G355700	mRNA	2.77453	0.000277323	0.000127452	dehydration-responsive element-binding protein 3
GLYMA_09G109600	mRNA	-1.45663	2.5909e-75	1.98724e-76	protein trichome birefringence
GLYMA_05G056000	mRNA	3.01448	6.16929e-42	7.45193e-43	protein YABBY 7
GLYMA_06G113000	mRNA	1.16324	1.4886e-09	4.52363e-10	uncharacterized LOC100305646
GLYMA_13G087800	mRNA	3.25669	9.56202e-48	1.04811e-48	2,3-bisphosphoglycerate-dependent phosphoglycerate mutase
GLYMA_20G036100	mRNA	-5.51167	0	0	putative ribonuclease 1
GLYMA_14G054500	mRNA	-2.78771	1.53975e-09	4.68369e-10	G-type lectin S-receptor-like serine/threonine-protein kinase At4g27290
GLYMA_13G199800	mRNA	1.22948	5.2967e-21	1.01905e-21	annexin-like protein RJ4-like
GLYMA_06G322500	mRNA	-1.15715	2.88915e-06	1.09811e-06	pentatricopeptide repeat-containing protein At3g24000, mitochondrial
GLYMA_09G022000	mRNA	1.30421	0.000907875	0.000443157	patatin-like protein 3
GLYMA_02G099200	mRNA	-1.44145	9.08978e-56	8.90018e-57	allene oxide cyclase 4, chloroplastic-like
GLYMA_11G210300	mRNA	-6.1621	2.12272e-09	6.51228e-10	prenyltransferase family protein PT11a
GLYMA_13G262400	mRNA	4.93681	1.92417e-22	3.54982e-23	glucan endo-1,3-beta-glucosidase
GLYMA_02G008000	mRNA	-1.10362	1.00777e-47	1.10573e-48	ABC transporter B family member 4
GLYMA_20G206800	mRNA	1.51972	2.65469e-07	9.32744e-08	peroxisomal membrane protein PMP22-like
GLYMA_18G237100	mRNA	1.23631	3.35482e-69	2.77533e-70	probable serine/threonine-protein kinase At1g01540
GLYMA_10G289900	mRNA	1.51467	0.000950394	0.000465181	WUSCHEL-related homeobox 13
GLYMA_10G211000	mRNA	1.6324	3.0465e-142	1.34569e-143	aquaporin PIP2-13
GLYMA_10G244600	mRNA	1.05654	1.14331e-27	1.84675e-28	VAN3-binding protein
GLYMA_13G139500	mRNA	-1.24783	3.58724e-39	4.54628e-40	putative serine/threonine-protein kinase
GLYMA_02G063900	mRNA	-3.32233	2.61028e-17	5.68567e-18	MLO-like protein 12
GLYMA_14G049500	mRNA	-1.3601	0	0	putative 1-aminocyclopropane-1-carboxylate oxidase
GLYMA_18G230500	mRNA	-1.16595	7.35326e-17	1.62664e-17	uncharacterized LOC100305679
GLYMA_07G248600	mRNA	-3.1483	0	0	protein SRC2-like
GLYMA_07G264200	mRNA	-2.1483	1.28716e-05	5.17164e-06	1-aminocyclopropane-1-carboxylate oxidase
GLYMA_08G223700	mRNA	-1.08479	5.55351e-24	9.81082e-25	serine/threonine-protein kinase OSR1
GLYMA_05G018800	mRNA	2.05415	1.82708e-79	1.3411e-80	MADS-box protein FULc
GLYMA_07G094800	mRNA	-2.04384	5.86873e-09	1.85015e-09	PR5-like receptor kinase
GLYMA_11G225400	mRNA	1.20531	3.03517e-75	2.33131e-76	uncharacterized LOC100782060
GLYMA_20G239500	mRNA	-2.27098	7.03378e-24	1.24719e-24	uncharacterized LOC100798350
GLYMA_07G267800	mRNA	-1.29503	0	0	oligopeptide transporter 3
GLYMA_11G230300	mRNA	-1.92591	1.4916e-11	4.0801e-12	putative serine/threonine-protein kinase-like protein CCR3
GLYMA_20G092900	mRNA	-1.72297	3.59212e-34	5.03827e-35	putative nuclear envelope-associated protein
GLYMA_07G139100	mRNA	-1.00615	1.15684e-69	9.50074e-71	protein NRT1/ PTR FAMILY 5.6
GLYMA_07G2232001	mRNA	1.16881	1.98814e-05	8.11897e-06	probable zinc transporter 10-like
GLYMA_20G023000	mRNA	1.00565	1.04831e-06	3.84979e-07	putative E3 ubiquitin-protein ligase LIN
GLYMA_07G162900	mRNA	5.59862	4.92593e-162	1.93545e-163	allene oxide synthase, chloroplastic-like
GLYMA_07G049300	mRNA	3.02607	3.0569e-05	1.2721e-05	NDR1/HIN1-like protein 12
GLYMA_15G161200	mRNA	3.22591	1.34015e-24	2.32694e-25	probable receptor-like serine/threonine-protein kinase At5g57670
GLYMA_12G070200	mRNA	-4.83087	0.00026267	0.000120431	fasciclin-like arabinogalactan protein 12
GLYMA_13G326800	mRNA	-1.24343	1.84219e-162	7.21305e-164	F-box/kelch-repeat protein At5g60570
GLYMA_06G315100	mRNA	-1.48847	4.09693e-27	6.70366e-28	phospholipid-transporting ATPase 1
GLYMA_20G179700	mRNA	1.04681	5.99278e-94	3.84812e-95	aquaporin PIP2-14
GLYMA_11G100000	mRNA	1.24805	4.52818e-29	7.07965e-30	uncharacterized LOC100782051
GLYMA_12G015300	mRNA	-3.39539	1.30774e-14	3.13608e-15	alcohol dehydrogenase-like 2-like
GLYMA_03G179900	mRNA	-2.05441	3.74521e-117	1.97294e-118	fasciclin-like arabinogalactan protein 11
GLYMA_07G087400	mRNA	-4.45909	9.87194e-11	2.81919e-11	aldehyde dehydrogenase family 2 member C3
GLYMA_07G128700	mRNA	1.78009	5.13059e-24	9.05111e-25	protein EFFECTOR OF TRANSCRIPTION 2
GLYMA_12G072100	mRNA	-1.04898	3.18867e-19	6.49906e-20	tetraspanin-3
GLYMA_14G043700	mRNA	5.30703	8.46697e-20	1.69247e-20	UDP-glycosyltransferase 92A1
GLYMA_15G141600	mRNA	-1.67713	0	0	uncharacterized LOC100305676
GLYMA_03G264300	mRNA	-1.143	2.58461e-32	3.77808e-33	linoleate 13S-lipoxygenase 3-1, chloroplastic
GLYMA_13G267100	mRNA	-1.72856	6.91926e-41	8.50498e-42	uncharacterized LOC100305673
GLYMA_16G135300	mRNA	-2.88082	1.04547e-41	1.26825e-42	uncharacterized LOC106796447
GLYMA_03G116200	mRNA	4.55214	0.000977298	0.000479362	hydroquinone glucosyltransferase
GLYMA_19G081500	mRNA	-4.87076	3.68417e-34	5.1704e-35	F-box protein CPR1
GLYMA_14G064900	mRNA	-1.33282	4.45525e-138	2.02142e-139	mitochondrial substrate carrier family protein B
GLYMA_14G179000	mRNA	-1.58345	9.29913e-13	2.41815e-13	serine/threonine-protein kinase PEPKR2
GLYMA_19G214900	mRNA	3.92138	4.78591e-20	9.4883e-21	transcription factor MYB111
GLYMA_04G019500	mRNA	1.13655	2.7876e-30	4.23897e-31	L-ascorbate oxidase homolog
GLYMA_07G193300	mRNA	6.09646	3.18023e-09	9.85762e-10	polyphenol oxidase I, chloroplastic
GLYMA_19G112800	mRNA	-1.56334	1.52047e-22	2.79385e-23	uncharacterized LOC100795317
GLYMA_18G050800	mRNA	-1.3193	0	0	root phototropism protein 2
GLYMA_11G147100	mRNA	-1.03282	6.2132e-44	7.25255e-45	uncharacterized LOC100815566
GLYMA_04G061200	mRNA	-2.67668	2.52072e-12	6.67655e-13	protein POLAR LOCALIZATION DURING ASYMMETRIC DIVISION AND REDISTRIBUTION
GLYMA_19G151800	mRNA	1.29136	2.66271e-36	3.57279e-37	probably inactive leucine-rich repeat receptor-like protein kinase IMK2
GLYMA_03G165100	mRNA	-1.66509	6.30395e-19	1.2986e-19	glutathione gamma-glutamylcysteinyltransferase 3
GLYMA_11G185700	mRNA	-6.63273	1.08437e-23	1.93073e-24	cytochrome P450 94C1
GLYMA_14G203100	mRNA	-3.04405	4.74476e-23	8.5865e-24	EPIDERMAL PATTERNING FACTOR-like protein 6
GLYMA_08G324300	mRNA	-2.87891	1.00308e-49	1.06968e-50	glycerophosphodiester phosphodiesterase GDPDL3
GLYMA_06G322100	mRNA	-2.25521	0.000154307	6.90311e-05	uncharacterized LOC100305699
GLYMA_17G153300	mRNA	-2.78284	3.79418e-70	3.09431e-71	protein NRT1/ PTR FAMILY 7.3
GLYMA_05G232000	mRNA	5.82516	7.49357e-08	2.52513e-08	leucine-rich repeat extensin-like protein 4
GLYMA_14G074700	mRNA	-1.12925	0	0	probable LRR receptor-like serine/threonine-protein kinase At2g16250
GLYMA_16G156200	mRNA	-1.2147	2.3007e-34	3.21314e-35	leucine-rich repeat receptor-like tyrosine-protein kinase PXC3
GLYMA_16G123800	mRNA	-1.35475	0.000402757	0.000188404	protein MID1-COMPLEMENTING ACTIVITY 1
GLYMA_05G025200	mRNA	-1.13897	2.99301e-21	5.711e-22	NEP1-interacting protein-like 2
GLYMA_06G121000	mRNA	-4.17032	4.08665e-39	5.18702e-40	uncharacterized LOC100798371
GLYMA_05G222300	mRNA	-1.01888	5.84872e-17	1.29031e-17	cytidine deaminase 1-like
GLYMA_02G213700	mRNA	1.59671	5.57152e-21	1.07313e-21	carbonic anhydrase, chloroplastic-like
GLYMA_08G015300	mRNA	2.30733	0	0	aquaporin PIP1-6
GLYMA_13G315200	mRNA	-2.88472	7.42809e-49	8.01849e-50	capsanthin/capsorubin synthase, chromoplastic
GLYMA_13G321100	mRNA	-2.44786	1.31284e-07	4.50212e-08	terpene synthase 21
GLYMA_09G000600	mRNA	-1.11596	1.08805e-06	4.00095e-07	zeaxanthin epoxidase, chloroplastic
GLYMA_05G079700	mRNA	-2.04329	0	0	calmodulin-like
GLYMA_07G243100	mRNA	1.13798	1.19677e-19	2.4043e-20	leucine-rich repeat extensin-like protein 1
GLYMA_05G236800	mRNA	-4.27906	4.35573e-188	1.50357e-189	pectinesterase-like
GLYMA_08G088400	mRNA	5.09646	3.87353e-17	8.50117e-18	cellulose synthase A catalytic subunit 4 [UDP-forming]
GLYMA_13G270900	mRNA	1.33421	8.85548e-127	4.35108e-128	TPR repeat-containing thioredoxin TTL1
GLYMA_12G035300	mRNA	2.85062	6.64113e-38	8.61038e-39	auxin-induced protein 6B-like
GLYMA_07G139200	mRNA	-1.74195	0	0	uncharacterized LOC100305688
GLYMA_01G135500	mRNA	-7.63511	0	0	SPX domain-containing protein 1
GLYMA_16G021600	mRNA	1.56863	4.44751e-14	1.09044e-14	uncharacterized LOC100780348
GLYMA_20G209000	mRNA	-1.01242	1.34382e-150	5.62079e-152	probable methyltransferase PMT3
GLYMA_04G086700	mRNA	-1.64378	0.000173949	7.82736e-05	receptor-like protein kinase HSL1
GLYMA_04G044900	mRNA	-1.68778	1.45961e-246	3.86445e-248	zinc finger protein ZAT10
GLYMA_15G155500	mRNA	3.77453	1.86515e-09	5.70351e-10	general transcriptional corepressor trfA
GLYMA_16G190600	mRNA	-2.0786	6.80046e-19	1.402e-19	receptor-like protein EIX1
GLYMA_08G039500	mRNA	1.02029	0.000317796	0.000147014	probable serine incorporator
GLYMA_15G238400	mRNA	1.37629	1.5251e-30	2.30751e-31	annexin D4-like
GLYMA_20G145300	mRNA	3.80368	7.60907e-81	5.5084e-82	primary amine oxidase
GLYMA_13G224800	mRNA	1.44423	7.90607e-08	2.6692e-08	uncharacterized LOC100798360
GLYMA_05G014900	mRNA	2.59945	1.70797e-05	6.93711e-06	kinesin-like protein KIN-8A
GLYMA_U007600	mRNA	1.67075	3.02755e-07	1.06722e-07	uncharacterized LOC106798953
GLYMA_05G066500	mRNA	1.05682	9.65951e-08	3.28463e-08	(S)-ureidoglycine aminohydrolase
GLYMA_12G194000	mRNA	-1.75479	0	0	protein DETOXIFICATION 40
GLYMA_20G099400	mRNA	2.44111	2.68191e-14	6.51995e-15	WUSCHEL-related homeobox 13
GLYMA_12G172300	mRNA	1.44523	5.30545e-24	9.36393e-25	uncharacterized LOC100817341
GLYMA_01G200500	mRNA	-2.85967	5.98869e-25	1.03232e-25	type I inositol polyphosphate 5-phosphatase 2-like
GLYMA_13G279600	mRNA	-1.26691	2.45543e-75	1.88266e-76	COP1-interacting protein 7
GLYMA_13G210700	mRNA	-1.5604	3.62563e-58	3.43434e-59	uncharacterized LOC100815597
GLYMA_12G051000	mRNA	-1.06177	5.9547e-26	1.00276e-26	flowering time control protein FPA
GLYMA_11G063600	mRNA	-1.80221	9.67952e-22	1.82162e-22	elongation of fatty acids protein 3-like
GLYMA_20G204800	mRNA	5.28911	1.01161e-05	4.02546e-06	uncharacterized LOC100795343
GLYMA_01G131500	mRNA	-1.82171	6.40895e-95	4.07517e-96	CBL-interacting protein kinase 2
GLYMA_11G231300	mRNA	-2.46953	1.05931e-95	6.68371e-97	uncharacterized LOC100305722
GLYMA_01G083300	mRNA	-3.80541	1.71899e-09	5.24533e-10	endonuclease 2
GLYMA_18G130100	mRNA	-1.00818	3.92045e-47	4.34858e-48	glycosyltransferase family 92 protein RCOM_0530710
GLYMA_03G022800	mRNA	-1.28336	8.43481e-09	2.68488e-09	calmodulin
GLYMA_08G078500	mRNA	-2.8908	6.20279e-34	8.74057e-35	protein LIGHT-DEPENDENT SHORT HYPOCOTYLS 4
GLYMA_19G144600	mRNA	-2.84018	5.08946e-10	1.50803e-10	cytochrome P450 93A3
GLYMA_15G045200	mRNA	-4.7021	2.19179e-53	2.21718e-54	LOB domain-containing protein 11
GLYMA_05G140700	mRNA	-2.55638	0.000228907	0.000104205	uncharacterized LOC106798904
GLYMA_18G216200	mRNA	1.90361	1.53026e-22	2.81225e-23	probable inactive receptor kinase At5g58300
GLYMA_07G261200	mRNA	1.36014	7.71847e-18	1.65355e-18	ankyrin repeat domain-containing protein 13C
GLYMA_10G204200	mRNA	-2.39631	0	0	transcription factor HHO3
GLYMA_18G099700	mRNA	-1.85385	2.32949e-26	3.8847e-27	probable folate-biopterin transporter 4
GLYMA_18G022700	mRNA	-2.99109	0	0	wound-inducible protein 12
GLYMA_06G300600	mRNA	-1.36095	3.01124e-29	4.68579e-30	G-type lectin S-receptor-like serine/threonine-protein kinase At2g19130
GLYMA_03G104500	mRNA	-1.71261	3.65274e-13	9.30938e-14	hydroquinone glucosyltransferase
GLYMA_13G199500	mRNA	-1.32107	1.63804e-08	5.31005e-09	annexin-like protein RJ4
GLYMA_10G151800	mRNA	-1.49239	7.34733e-190	2.51221e-191	uncharacterized LOC100305730
GLYMA_14G073300	mRNA	-2.49225	0.000391891	0.000182979	F-box protein PP2-B10-like
GLYMA_13G165000	mRNA	1.34033	1.24932e-13	3.1244e-14	uncharacterized LOC100782109
GLYMA_08G015100	mRNA	1.46194	3.27704e-79	2.40987e-80	uncharacterized LOC100813885
GLYMA_08G136200	mRNA	-1.80221	4.82327e-111	2.66052e-112	annexin D2-like
GLYMA_16G212600	mRNA	-2.2002	8.76979e-35	1.21139e-35	putative GEM-like protein 8
GLYMA_18G041000	mRNA	1.88145	2.17089e-24	3.79069e-25	condensin complex subunit 3
GLYMA_17G021000	mRNA	-1.02798	4.4843e-59	4.1988e-60	uncharacterized LOC100780376
GLYMA_14G218200	mRNA	1.08555	4.05703e-157	1.6394e-158	putative disulfide-isomerase LQY1
GLYMA_15G035800	mRNA	1.19291	2.81444e-43	3.32591e-44	uncharacterized LOC100815636
GLYMA_15G003900	mRNA	-1.53796	6.37172e-06	2.4917e-06	aquaporin NIP6-3
GLYMA_08G303000	mRNA	-1.41944	1.07745e-42	1.28706e-43	DEAD-box ATP-dependent RNA helicase 53, mitochondrial
GLYMA_06G244900	mRNA	-1.09092	1.18907e-07	4.06602e-08	uncharacterized LOC100305715
GLYMA_10G013900	mRNA	1.21805	1.64926e-16	3.6974e-17	probable beta-D-xylosidase 2
GLYMA_09G138600	mRNA	-1.828	3.74022e-12	9.97495e-13	heavy metal-associated isoprenylated plant protein 39
GLYMA_07G254900	mRNA	-2.09048	3.38548e-91	2.23852e-92	putative UDP-glucosyltransferase
GLYMA_02G265800	mRNA	-1.47319	4.76525e-72	3.79271e-73	glycine-rich cell wall structural protein
GLYMA_13G186600	mRNA	-3.49288	0	0	protein ZINC INDUCED FACILITATOR-LIKE 1
GLYMA_07G086900	mRNA	-1.51087	5.08198e-15	1.19944e-15	uncharacterized LOC100798389
GLYMA_06G057000	mRNA	2.46968	1.19096e-05	4.76661e-06	guanine nucleotide-binding protein alpha-1 subunit
GLYMA_15G010800	mRNA	-1.26378	1.76121e-19	3.56035e-20	acyl-protein thioesterase 2
GLYMA_15G245600	mRNA	-1.11469	1.00218e-17	2.15603e-18	C2 domain-containing protein At1g53590
GLYMA_10G259400	mRNA	-1.05774	1.58675e-65	1.37496e-66	probable protein phosphatase 2C 63
GLYMA_10G022900	mRNA	-1.38896	8.01448e-150	3.36313e-151	gibberellin receptor GID1B
GLYMA_01G037600	mRNA	-2.08013	5.3796e-08	1.79848e-08	formin-like protein 8
GLYMA_13G127700	mRNA	1.57861	3.40411e-05	1.42356e-05	cleavage stimulating factor 64
GLYMA_13G095200	mRNA	-3.63108	3.96593e-44	4.61962e-45	probable xyloglucan endotransglucosylase/hydrolase protein 23
GLYMA_01G035600	mRNA	3.28911	3.62306e-17	7.93665e-18	cyclin-D1-1
GLYMA_05G125800	mRNA	1.32481	1.09423e-67	9.23421e-69	berberine bridge enzyme-like 13
GLYMA_07G023600	mRNA	-5.36672	1.05589e-29	1.62838e-30	metal transporter Nramp5a
GLYMA_07G059300	mRNA	-1.76816	0	0	ribonuclease 2
GLYMA_18G271500	mRNA	-3.03282	1.4101e-29	2.18042e-30	receptor-like protein kinase ANXUR2
GLYMA_15G040700	mRNA	-5.07721	3.20702e-132	1.51803e-133	zinc finger protein ZAT12
GLYMA_05G227400	mRNA	-2.12234	6.0028e-234	1.67931e-235	NADP-dependent malic enzyme
GLYMA_03G247500	mRNA	-2.15698	1.65322e-78	1.22476e-79	uncharacterized LOC100526916
GLYMA_07G090800	mRNA	-1.06281	3.49919e-133	1.64107e-134	uncharacterized LOC100306435
GLYMA_13G352300	mRNA	-1.7541	2.02386e-33	2.87893e-34	jacalin-related lectin 19
GLYMA_01G091800	mRNA	-1.08029	6.08615e-26	1.02539e-26	PHO1 family protein
GLYMA_14G188300	mRNA	-4.73326	0.000450348	0.000211925	protein RESPONSE TO LOW SULFUR 3
GLYMA_19G247800	mRNA	2.77453	2.35376e-05	9.68717e-06	uncharacterized LOC102662645
GLYMA_09G220600	mRNA	1.99678	3.37066e-11	9.38821e-12	auxin-induced protein 10A5-like
GLYMA_19G155800	mRNA	4.1371	6.86088e-05	2.95696e-05	protein FANTASTIC FOUR 1
GLYMA_18G285800	mRNA	-4.54799	2.26718e-78	1.68084e-79	chalcone reductase CHR5
GLYMA_08G110300	mRNA	-5.66159	5.42666e-07	1.94812e-07	chalcone synthase 3
GLYMA_03G102800	mRNA	-3.63108	1.23867e-22	2.27098e-23	dynamin-related protein 1E
GLYMA_13G315400	mRNA	4.86026	5.43203e-95	3.45102e-96	uncharacterized LOC100306432
GLYMA_14G093100	mRNA	-1.05882	0	0	metallothionein-like protein 1
GLYMA_19G211600	mRNA	-2.31293	2.52308e-18	5.31172e-19	late embryogenesis abundant protein
GLYMA_07G216400	mRNA	-3.12028	0.00046977	0.000221557	uncharacterized LOC100306423
GLYMA_01G201000	mRNA	1.07859	0	0	uncharacterized LOC100306424
GLYMA_10G258800	mRNA	-1.18873	2.4947e-98	1.53798e-99	leucine-rich repeat protein
GLYMA_05G225900	mRNA	1.3079	1.98413e-18	4.15869e-19	uncharacterized LOC100526906
GLYMA_09G084600	mRNA	-1.34248	1.75585e-46	1.97153e-47	periodic tryptophan protein 2
GLYMA_03G032400	mRNA	-7.39817	0	0	SPX domain-containing protein 3
GLYMA_19G189300	mRNA	-2.77502	3.19262e-115	1.71056e-116	probable glycosyltransferase At5g03795
GLYMA_16G037500	mRNA	1.00829	4.78763e-72	3.81183e-73	probable inactive leucine-rich repeat receptor-like protein kinase At3g03770
GLYMA_06G149500	mRNA	2.51738	2.58808e-12	6.85922e-13	auxin-induced protein 5NG4-like
GLYMA_13G270100	mRNA	-2.81158	1.92889e-197	6.3639e-199	epidermis-specific secreted glycoprotein EP1
GLYMA_01G203400	mRNA	-1.0277	0	0	beta-amylase 3, chloroplastic
GLYMA_05G034600	mRNA	-1.38183	1.1828e-106	6.75978e-108	calmodulin-binding protein 60 A
GLYMA_08G243100	mRNA	5.1371	3.10524e-05	1.29366e-05	uncharacterized LOC100789065
GLYMA_15G088100	mRNA	-1.14732	2.56485e-35	3.51141e-36	MACPF domain-containing protein CAD1
GLYMA_19G104600	mRNA	1.03314	6.9471e-15	1.64741e-15	probable receptor-like protein kinase At1g30570
GLYMA_15G211500	mRNA	-1.3197	0.000119817	5.29516e-05	alpha-amylase/subtilisin inhibitor
GLYMA_07G240800	mRNA	-1.42163	7.90667e-58	7.53262e-59	uncharacterized LOC100306419
GLYMA_03G173300	mRNA	-2.00936	4.61411e-14	1.13192e-14	C2H2-type zinc finger protein
GLYMA_06G033900	mRNA	1.2111	1.39895e-05	5.63739e-06	methyladenine glycosylase domain-containing protein
GLYMA_15G020300	mRNA	1.3137	8.48275e-33	1.22193e-33	auxin-responsive protein IAA26
GLYMA_15G262600	mRNA	-3.36077	0	0	uncharacterized LOC100804596
GLYMA_08G099800	mRNA	-3.76979	3.10502e-09	9.62153e-10	uncharacterized LOC100804600
GLYMA_16G051300	mRNA	-1.44298	9.44091e-21	1.83181e-21	acyltransferase-like protein At3g26840, chloroplastic
GLYMA_18G116500	mRNA	-1.23197	1.76886e-188	6.08671e-190	uncharacterized LOC100786117
GLYMA_13G306900	mRNA	2.06671	0.000251882	0.000115162	peroxidase 3
GLYMA_02G245200	mRNA	2.51367	3.03236e-16	6.86507e-17	myosin-binding protein 3
GLYMA_10G054700	mRNA	-5.73326	2.70337e-07	9.50437e-08	transcription factor RAX2
GLYMA_02G028600	mRNA	-2.0215	0	0	putative metalloendoproteinase
GLYMA_14G015800	mRNA	1.83883	2.44682e-86	1.68792e-87	transcription termination factor MTERF9, chloroplastic
GLYMA_02G169000	mRNA	2.11918	1.4987e-05	6.05446e-06	uncharacterized LOC100801654
GLYMA_15G158200	mRNA	-5.67668	1.01351e-36	1.34969e-37	uncharacterized LOC102660944
GLYMA_08G299400	mRNA	4.3595	1.19418e-05	4.7803e-06	transcription factor TCP15
GLYMA_03G232600	mRNA	-1.32156	1.29686e-73	1.01627e-74	calmodulin-binding protein 60 E
GLYMA_07G132100	mRNA	3.28911	1.83237e-06	6.85234e-07	kinesin-like protein KIN-10B
GLYMA_17G174900	mRNA	-1.42328	1.9237e-07	6.68037e-08	heat stress transcription factor 35
GLYMA_10G142600	mRNA	-1.15969	1.05093e-24	1.82103e-25	transcription factor PIF3
GLYMA_09G181100	mRNA	4.01157	5.73279e-42	6.91999e-43	alpha-amylase inhibitor/lipid transfer/seed storage family protein
GLYMA_18G219100	mRNA	-1.29348	0	0	2,3-bisphosphoglycerate-independent phosphoglycerate mutase
GLYMA_09G130400	mRNA	-2.69803	0	0	heavy-metal-associated domain-containing protein
GLYMA_09G272500	mRNA	1.49967	1.06769e-06	3.92374e-07	BTB/POZ domain-containing protein At3g08570
GLYMA_04G240700	mRNA	2.23021	0.000620554	0.00029691	protein trichome berefringence-like 7
GLYMA_04G026400	mRNA	-5.22344	7.59116e-216	2.30167e-217	aldehyde oxidase GLOX1
GLYMA_20G118500	mRNA	-1.08803	4.40983e-19	9.02647e-20	LEAF RUST 10 DISEASE-RESISTANCE LOCUS RECEPTOR-LIKE PROTEIN KINASE-like 2.4
GLYMA_19G137800	mRNA	-3.31822	2.75334e-08	9.0344e-09	heat stress transcription factor 36
GLYMA_07G011700	mRNA	-1.01817	3.56867e-16	8.09676e-17	inorganic pyrophosphatase 1-like protein
GLYMA_19G054700	mRNA	-1.98558	2.42903e-145	1.05043e-146	TMV resistance protein N
GLYMA_04G214000	mRNA	-4.20275	6.22744e-09	1.96655e-09	pectinesterase inhibitor domain-containing protein
GLYMA_02G055000	mRNA	-3.05074	6.31983e-15	1.49668e-15	uncharacterized LOC100801665
GLYMA_20G171900	mRNA	-3.03282	0.000837184	0.000406905	lignin-forming anionic peroxidase
GLYMA_05G156000	mRNA	1.53108	2.14756e-49	2.30303e-50	glucan endo-1,3-beta-glucosidase 4
GLYMA_19G233900	mRNA	-3.81277	6.70775e-91	4.4444e-92	respiratory burst oxidase homolog protein B
GLYMA_02G236800	mRNA	-2.29586	3.89644e-07	1.38524e-07	pathogenesis-related genes transcriptional activator PTI6
GLYMA_02G217400	mRNA	-1.69908	7.7615e-106	4.46749e-107	glycine-rich domain-containing protein 2
GLYMA_11G046800	mRNA	1.02723	5.29438e-17	1.16599e-17	galactomannan galactosyltransferase 1
GLYMA_04G022300	mRNA	-2.36761	6.54062e-133	3.07458e-134	CO(2)-response secreted protease
GLYMA_09G094400	mRNA	-4.49127	1.11763e-30	1.68703e-31	isoflavone-7-O-methyltransferase 6
GLYMA_04G123700	mRNA	-1.08523	6.75168e-43	8.03206e-44	urea-proton symporter DUR3
GLYMA_09G200800	mRNA	1.45903	0.000450349	0.000211858	kinesin-like protein KIN-14R
GLYMA_04G152400	mRNA	4.42661	6.67681e-06	2.61493e-06	transcription factor DICHOTOMA
GLYMA_20G121100	mRNA	-1.19906	0	0	neurogenic protein mastermind
GLYMA_12G057900	mRNA	-2.38646	3.35426e-13	8.53495e-14	transcription factor MYB46
GLYMA_05G195200	mRNA	-6.03282	1.04323e-08	3.34074e-09	protein DOG1-like 4
GLYMA_09G051100	mRNA	-1.33842	6.57471e-158	2.64423e-159	cellulose synthase A catalytic subunit 4 [UDP-forming]
GLYMA_19G076200	mRNA	6.42661	3.22769e-11	8.97769e-12	basic endochitinase
GLYMA_09G198900	mRNA	-1.86162	3.41518e-121	1.73948e-122	dirigent protein 19
GLYMA_15G061400	mRNA	-5.05519	2.62766e-16	5.93167e-17	transcription factor bHLH25-like
GLYMA_07G012100	mRNA	-1.41546	6.52462e-60	6.03628e-61	dof zinc finger protein DOF3.1
GLYMA_07G266200	mRNA	-4.81969	0	0	inositol monophosphatase 3-like
GLYMA_10G228900	mRNA	-3.84018	0.000570572	0.000271697	G-type lectin S-receptor-like serine/threonine-protein kinase At5g24080
GLYMA_02G117900	mRNA	1.38575	3.37043e-05	1.40892e-05	phosphoenolpyruvate carboxylase 4
GLYMA_10G177300	mRNA	5.05464	5.46478e-05	2.33395e-05	probably inactive leucine-rich repeat receptor-like protein kinase IMK2
GLYMA_18G237900	mRNA	-2.49169	1.2376e-208	3.89081e-210	cysteine-rich receptor-like protein kinase
GLYMA_13G152400	mRNA	1.226	3.02841e-32	4.43259e-33	ankyrin repeat domain-containing protein EMB506, chloroplastic
GLYMA_01G189200	mRNA	-1.17368	6.68629e-22	1.25139e-22	probable beta-1,4-xylosyltransferase IRX14
GLYMA_06G313500	mRNA	-1.18057	3.76033e-12	1.00296e-12	protein ZINC INDUCED FACILITATOR-LIKE 1
GLYMA_02G303100	mRNA	2.11014	5.72186e-07	2.05854e-07	uncharacterized protein At1g08160
GLYMA_02G023500	mRNA	-1.12669	4.10911e-24	7.2177e-25	dnaJ homolog subfamily B member 13
GLYMA_08G146900	mRNA	-2.0452	1.66696e-26	2.77122e-27	nodulation-signaling pathway 2 protein
GLYMA_06G090200	mRNA	-1.13719	3.00656e-93	1.94699e-94	amino acid permease 6
GLYMA_07G126000	mRNA	2.22867	2.69198e-45	3.07917e-46	leucine-rich repeat extensin-like protein 6
GLYMA_10G168300	mRNA	1.03757	0.000236834	0.000107981	uncharacterized LOC102664931
GLYMA_18G072300	mRNA	-1.46892	0.000304346	0.000140456	chaperone protein dnaJ 11, chloroplastic
GLYMA_07G085100	mRNA	1.28327	4.20384e-24	7.38983e-25	probable protein ABIL5
GLYMA_10G197900	mRNA	-5.98702	1.78325e-08	5.79345e-09	4-coumarate--CoA ligase-like 5
GLYMA_08G198500	mRNA	-2.63275	1.04858e-24	1.81668e-25	putative leucine-rich repeat receptor-like protein kinase At2g19210
GLYMA_02G284500	mRNA	2.15957	2.3364e-67	1.98315e-68	anaphase-promoting complex subunit 5
GLYMA_13G162600	mRNA	-4.78503	0	0	monogalactosyldiacylglycerol synthase 2, chloroplastic
GLYMA_05G176900	mRNA	-1.57198	3.8221e-08	1.26382e-08	uncharacterized LOC102664932
GLYMA_08G034300	mRNA	3.14031	0.000348047	0.00016171	NADP-dependent malic enzyme
GLYMA_01G061800	mRNA	-1.8274	2.30621e-27	3.75408e-28	uncharacterized LOC100804606
GLYMA_02G046800	mRNA	1.80709	7.18535e-110	4.00655e-111	alpha-mannosidase
GLYMA_01G003700	mRNA	-2.07793	2.31034e-141	1.02808e-142	uncharacterized LOC100778421
GLYMA_13G033500	mRNA	-2.60546	0	0	LEAF RUST 10 DISEASE-RESISTANCE LOCUS RECEPTOR-LIKE PROTEIN KINASE-like 2.2
GLYMA_10G017000	mRNA	6.92138	5.06533e-15	1.19538e-15	endoglucanase 17
GLYMA_11G243900	mRNA	-1.47422	0	0	protein-tyrosine-phosphatase MKP1
GLYMA_18G052100	mRNA	-1.07339	9.25157e-24	1.64523e-24	B3 domain-containing transcription repressor VAL1
GLYMA_19G2502001	mRNA	8.27378	0	0	GDSL esterase/lipase At5g33370
GLYMA_06G059500	mRNA	-1.59291	1.12723e-27	1.82016e-28	uncharacterized LOC100500572
GLYMA_11G046400	mRNA	-5.93971	3.06285e-08	1.00759e-08	VQ motif-containing protein
GLYMA_16G152400	mRNA	2.45261	8.16642e-05	3.54824e-05	E3 ubiquitin-protein ligase SIRP1
GLYMA_03G084200	mRNA	-6.24227	1.37637e-18	2.86515e-19	membrane protein of ER body 2
GLYMA_08G138100	mRNA	2.59521	1.00989e-10	2.88525e-11	2,3-bisphosphoglycerate-dependent phosphoglycerate mutase
GLYMA_03G130200	mRNA	1.77126	2.29886e-20	4.51372e-21	protein STRICTOSIDINE SYNTHASE-LIKE 2
GLYMA_08G256400	mRNA	-1.07416	2.28327e-23	4.10086e-24	transcription factor DICHOTOMA
GLYMA_16G062500	mRNA	-2.96518	0	0	lysine histidine transporter 1
GLYMA_03G225500	mRNA	-1.62107	1.29146e-174	4.72214e-176	uncharacterized protein C24B11.05
GLYMA_11G111800	mRNA	1.52517	4.23527e-16	9.63112e-17	subtilisin-like protease SBT3.9
GLYMA_03G255800	mRNA	1.21207	1.10623e-24	1.91716e-25	tubulin gamma-1 chain
GLYMA_14G156300	mRNA	-1.03282	0.000175297	7.89136e-05	calcium-binding EF-hand family protein
GLYMA_11G157000	mRNA	1.54826	1.15278e-54	1.1476e-55	aspartyl protease AED3
GLYMA_11G217400	mRNA	1.73074	1.71682e-13	4.3151e-14	proline-rich receptor-like protein kinase PERK13-like
GLYMA_04G006200	mRNA	1.82658	1.02365e-12	2.66666e-13	uncharacterized LOC100808079
GLYMA_07G096500	mRNA	3.12616	9.87194e-09	3.15687e-09	kinesin-like protein NACK1
GLYMA_11G144600	mRNA	-1.95407	4.3768e-32	6.42886e-33	exocyst complex component EXO70H1
GLYMA_01G028600	mRNA	1.11604	5.15234e-10	1.52695e-10	protein trichome birefringence-like 2
GLYMA_09G072200	mRNA	-1.44341	8.19797e-93	5.34237e-94	auxin response factor 19
GLYMA_03G127800	mRNA	-1.77605	0	0	sigma factor binding protein 1, chloroplastic
GLYMA_16G220700	mRNA	3.5115	1.05559e-07	3.59794e-08	acid phosphatase 1
GLYMA_20G119400	mRNA	-1.93549	3.02457e-05	1.25799e-05	LEAF RUST 10 DISEASE-RESISTANCE LOCUS RECEPTOR-LIKE PROTEIN KINASE-like 1.1
GLYMA_02G021500	mRNA	3.1371	0.000356091	0.000165603	hypersensitive-induced response protein 1
GLYMA_04G025400	mRNA	1.11665	5.30337e-37	7.00753e-38	filament-like plant protein 4
GLYMA_13G297400	mRNA	-1.47664	4.766e-58	4.52104e-59	uncharacterized LOC100500586
GLYMA_03G089800	mRNA	2.18957	3.22934e-09	1.0016e-09	uncharacterized LOC100306260
GLYMA_19G151300	mRNA	-1.07235	9.45459e-06	3.75013e-06	dirigent-like protein
GLYMA_20G073000	mRNA	2.64525	1.00605e-05	4.00198e-06	protein SMAX1-LIKE 3
GLYMA_11G226100	mRNA	1.00331	1.72696e-11	4.73895e-12	immediate early response 3-interacting protein 1
GLYMA_03G188500	mRNA	2.04603	7.2034e-81	5.21277e-82	polyadenylate-binding protein 7
GLYMA_08G305900	mRNA	1.0591	0.000241817	0.000110362	uncharacterized LOC100806386
GLYMA_19G076800	mRNA	-4.31822	1.05175e-09	3.17388e-10	lysine histidine transporter 1
GLYMA_10G065400	mRNA	2.21511	8.33102e-08	2.81721e-08	uncharacterized LOC100804666
GLYMA_03G225000	mRNA	1.20422	3.04265e-09	9.4204e-10	transcription factor PIF3
GLYMA_05G182000	mRNA	2.24729	3.61165e-05	1.51561e-05	E3 ubiquitin-protein ligase RNF13-like
GLYMA_17G169200	mRNA	-1.1268	3.85595e-06	1.47972e-06	protein IRX15-LIKE
GLYMA_15G063700	mRNA	-1.1667	1.10485e-69	9.06773e-71	uncharacterized LOC100500574
GLYMA_01G043600	mRNA	-1.7457	1.66321e-44	1.92511e-45	uncharacterized LOC100500581
GLYMA_12G117000	mRNA	-4.09262	0	0	ethylene-responsive transcription factor 9
GLYMA_20G181400	mRNA	-1.08659	4.01837e-08	1.33047e-08	ABC transporter G family member 28
GLYMA_20G110800	mRNA	-1.40089	1.06197e-151	4.41005e-153	uncharacterized LOC100500583
GLYMA_03G104000	mRNA	2.58264	1.17098e-34	1.62262e-35	uncharacterized LOC100804659
GLYMA_16G089700	mRNA	-5.92512	8.96911e-108	5.0721e-109	cytochrome P450 CYP82D47
GLYMA_05G158800	mRNA	1.79434	6.4007e-11	1.80773e-11	protein MALE DISCOVERER 2
GLYMA_08G115700	mRNA	-1.0644	4.81193e-43	5.71134e-44	putative lipase YDL109C-like
GLYMA_17G078800	mRNA	-1.31522	2.56996e-06	9.7287e-07	putative FBD-associated F-box protein At5g56820
GLYMA_09G222300	mRNA	2.05464	2.92542e-19	5.95773e-20	auxin-induced protein 10A5-like
GLYMA_04G091900	mRNA	3.05464	2.71253e-32	3.96654e-33	uncharacterized LOC100789170
GLYMA_16G078900	mRNA	-1.8792	9.29967e-31	1.40173e-31	receptor-like protein kinase 5
GLYMA_17G243000	mRNA	1.17671	1.37761e-57	1.31732e-58	uncharacterized LOC100306284
GLYMA_14G069300	mRNA	-1.57714	1.36313e-43	1.60119e-44	uncharacterized LOC100306285
GLYMA_16G077900	mRNA	-2.60794	1.74758e-43	2.05612e-44	pcbC domain-containing protein
GLYMA_13G116100	mRNA	-2.76521	2.4977e-163	9.75245e-165	CCT motif and tify domain-containing protein
GLYMA_19G174200	mRNA	-3.42514	4.53512e-05	1.92163e-05	C2H2-type zinc finger protein
GLYMA_14G092900	mRNA	1.28596	1.59326e-38	2.04485e-39	uncharacterized LOC100775515
GLYMA_12G019900	mRNA	-4.69958	4.14669e-30	6.33283e-31	dihydroflavonol-4-reductase-like
GLYMA_11G209900	mRNA	4.28911	2.85872e-18	6.02455e-19	GDSL esterase/lipase At5g03610
GLYMA_20G091300	mRNA	-2.85403	1.46782e-84	1.02618e-85	low temperature induced protein 6B-like protein
GLYMA_06G187300	mRNA	-1.58627	2.25306e-25	3.84817e-26	protein EDS1L
GLYMA_13G135600	mRNA	1.30364	5.33843e-90	3.55313e-91	glutathione S-transferase L3-like
GLYMA_10G066400	mRNA	-2.39759	1.03912e-50	1.0897e-51	putative phytosulfokine peptide
GLYMA_13G054700	mRNA	-2.03282	6.33711e-154	2.60569e-155	uncharacterized LOC100500597
GLYMA_06G141600	mRNA	-3.51155	5.28317e-59	4.95544e-60	uncharacterized LOC100775497
GLYMA_12G226600	mRNA	-2.63005	0	0	ethylene-responsive transcription factor 6
GLYMA_10G274600	mRNA	-1.34598	7.40884e-16	1.70075e-16	ethylene-responsive transcription factor ERF118
GLYMA_06G065900	mRNA	-1.07626	1.30751e-60	1.20181e-61	uncharacterized LOC100775494
GLYMA_19G180600	mRNA	-1.27393	2.35732e-63	2.09346e-64	dnaJ protein P58IPK homolog
GLYMA_19G214100	mRNA	2.96718	3.31108e-10	9.71791e-11	cellulose synthase-like protein D5
GLYMA_01G011500	mRNA	7.15777	3.37954e-259	8.60664e-261	uncharacterized LOC100806409
GLYMA_14G216100	mRNA	-2.49225	0.000391891	0.000182979	probable serine/threonine-protein kinase PBL7
GLYMA_13G241600	mRNA	1.19167	3.28274e-12	8.73877e-13	lactosylceramide 4-alpha-galactosyltransferase
GLYMA_02G076100	mRNA	1.30278	0.000478163	0.000225802	somatic embryogenesis receptor kinase 2
GLYMA_07G031000	mRNA	-1.57535	1.04972e-41	1.27369e-42	hypothetical protein
GLYMA_12G099200	mRNA	1.38342	1.7581e-98	1.0805e-99	uncharacterized GPI-anchored protein At1g61900
GLYMA_03G056800	mRNA	-4.99282	4.71393e-59	4.41638e-60	uncharacterized LOC102668583
GLYMA_08G110900	mRNA	-7.33897	8.94388e-19	1.85218e-19	chalcone synthase
GLYMA_16G041100	mRNA	-1.77648	4.59594e-14	1.12721e-14	uncharacterized LOC106796583
GLYMA_03G184500	mRNA	-2.04339	5.65845e-16	1.29323e-16	putative xyloglucan endotransglucosylase/hydrolase
GLYMA_19G093400	mRNA	3.92654	1.25934e-29	1.94592e-30	uncharacterized LOC100796708
GLYMA_16G164400	mRNA	-6.96356	4.45184e-15	1.04853e-15	peroxidase 12-like
GLYMA_08G244600	mRNA	-1.22216	9.21584e-11	2.62793e-11	UDP-glycosyltransferase 83A1
GLYMA_04G227700	mRNA	-1.90377	2.09785e-122	1.05936e-123	caffeic acid 3-O-methyltransferase-like
GLYMA_17G208200	mRNA	1.63905	0	0	uncharacterized LOC100813910
GLYMA_05G144500	mRNA	-1.11006	1.88609e-10	5.46877e-11	two-component response regulator ARR11
GLYMA_12G091100	mRNA	2.64642	3.47308e-108	1.96027e-109	uncharacterized LOC100305605
GLYMA_17G128100	mRNA	1.01685	2.70011e-13	6.84396e-14	malate synthase, glyoxysomal
GLYMA_11G033300	mRNA	1.67925	2.4926e-21	4.74053e-22	putative pentatricopeptide repeat-containing protein At5g47460
GLYMA_10G160200	mRNA	-1.74788	3.02249e-64	2.65864e-65	uncharacterized LOC100305603
GLYMA_20G229400	mRNA	-1.14088	1.44562e-14	3.47146e-15	uncharacterized LOC100778316
GLYMA_18G008600	mRNA	-3.08425	2.46909e-45	2.82153e-46	uncharacterized LOC100796689
GLYMA_08G359100	mRNA	2.55772	5.14613e-73	4.05657e-74	laccase-17
GLYMA_02G063300	mRNA	-1.18691	9.09266e-61	8.3402e-62	salicylic acid-binding protein 2
GLYMA_10G027200	mRNA	1.35256	5.4096e-21	1.04121e-21	uncharacterized LOC100796685
GLYMA_08G281700	mRNA	1.8047	2.64771e-55	2.60765e-56	BTB/POZ domain-containing protein At1g67900
GLYMA_16G137600	mRNA	-1.35402	1.23672e-98	7.58724e-100	TMV resistance protein N
GLYMA_18G032100	mRNA	2.10207	3.5455e-191	1.19972e-192	rop guanine nucleotide exchange factor 5
GLYMA_13G283100	mRNA	-1.92035	8.40899e-05	3.65708e-05	G-type lectin S-receptor-like serine/threonine-protein kinase At4g27290
GLYMA_09G208200	mRNA	-1.71732	2.09826e-20	4.11413e-21	cellulose synthase-like protein D3
GLYMA_16G149000	mRNA	1.89318	9.56175e-05	4.18605e-05	UPF0481 protein At3g47200
GLYMA_16G017700	mRNA	3.98141	0	0	transcription factor bHLH57
GLYMA_01G014000	mRNA	-4.3368	0	0	cellulose synthase-like protein D2
GLYMA_08G270600	mRNA	1.67767	0.000515591	0.000244243	NAD(P)-binding Rossmann-fold superfamily protein
GLYMA_15G090500	mRNA	-2.89837	8.64198e-71	6.98663e-72	uncharacterized LOC100795398
GLYMA_19G051100	mRNA	7.44291	2.248e-20	4.41265e-21	GDSL esterase/lipase At5g33370
GLYMA_19G016100	mRNA	-1.20867	0.0003459	0.000160628	probable galacturonosyltransferase-like 10
GLYMA_01G192500	mRNA	2.06479	4.3017e-24	7.56887e-25	peroxidase 51
GLYMA_19G021400	mRNA	2.80848	1.05081e-40	1.29679e-41	uncharacterized LOC100305611
GLYMA_10G201600	mRNA	-2.68255	4.10215e-93	2.65983e-94	GABA transporter 1
GLYMA_18G029900	mRNA	2.61104	0.000117511	5.18698e-05	uncharacterized acetyltransferase At3g50280
GLYMA_06G205300	mRNA	-1.01482	2.99944e-10	8.78405e-11	uncharacterized LOC106794242
GLYMA_10G125000	mRNA	2.69044	0	0	probable pectate lyase 8
GLYMA_16G195000	mRNA	1.43002	4.64529e-12	1.2433e-12	pentatricopeptide repeat-containing protein At1g62910
GLYMA_18G257700	mRNA	-1.50876	4.48638e-126	2.21414e-127	aldose 1-epimerase-like
GLYMA_08G1498001	mRNA	-1.94843	8.3771e-52	8.66148e-53	protein SRG1
GLYMA_13G053000	mRNA	5.1371	3.10524e-05	1.29366e-05	UDP-arabinopyranose mutase 1
GLYMA_05G188900	mRNA	-3.853	2.26546e-24	3.95644e-25	RING-H2 finger protein ATL78-like
GLYMA_18G003000	mRNA	-1.69542	7.58668e-276	1.81832e-277	receptor-like kinase TMK4
GLYMA_10G248800	mRNA	4.20819	3.14044e-45	3.59556e-46	thermospermine synthase ACAULIS5
GLYMA_02G263900	mRNA	-1.08744	0	0	probable inactive receptor-like protein kinase At3g56050
GLYMA_12G199600	mRNA	-5.12028	4.31898e-05	1.82557e-05	transcription factor MYB41
GLYMA_20G149200	mRNA	1.18591	3.85423e-45	4.4233e-46	protein NETWORKED 1A
GLYMA_04G011900	mRNA	-1.14616	1.35428e-11	3.69855e-12	glucose-1-phosphate adenylyltransferase large subunit 1
GLYMA_04G226100	mRNA	2.01781	3.65118e-07	1.29536e-07	UNC93-like protein 1
GLYMA_19G178100	mRNA	-1.13308	5.67014e-27	9.32423e-28	60S ribosomal protein L4
GLYMA_02G118400	mRNA	1.74562	0.000172161	7.74268e-05	phosphoenolpyruvate carboxylase 4
GLYMA_08G164500	mRNA	-1.62082	2.63548e-226	7.60282e-228	uncharacterized LOC100795419
GLYMA_05G124900	mRNA	-4.8908	7.86172e-08	2.65273e-08	berberine bridge enzyme-like 28
GLYMA_02G106200	mRNA	-4.42514	8.68373e-06	3.43253e-06	probable membrane-associated kinase regulator 6
GLYMA_13G095300	mRNA	-4.20275	6.22744e-09	1.96655e-09	probable xyloglucan endotransglucosylase/hydrolase protein 23
GLYMA_12G075600	mRNA	1.19205	2.69161e-29	4.18474e-30	uncharacterized LOC100812183
GLYMA_12G203600	mRNA	2.46858	2.07603e-117	1.0925e-118	expansin-B3-like
GLYMA_02G299600	mRNA	1.47307	7.08223e-06	2.7793e-06	meiotic recombination protein SPO11-1
GLYMA_20G123800	mRNA	-1.07564	1.21391e-111	6.6529e-113	protein FAM133
GLYMA_12G192600	mRNA	-4.01633	7.17696e-38	9.31097e-39	B-cell receptor-associated protein 31
GLYMA_19G177100	mRNA	-1.58324	4.41097e-212	1.36268e-213	ATP phosphoribosyltransferase 2, chloroplastic
GLYMA_12G106900	mRNA	-4.73326	0.000450348	0.000211925	external alternative NAD(P)H-ubiquinone oxidoreductase B3, mitochondrial
GLYMA_04G004200	mRNA	2.90578	1.97449e-08	6.43036e-09	subtilisin-like protease SBT1.6
GLYMA_05G003900	mRNA	-3.32787	1.46403e-118	7.60456e-120	galactinol--sucrose galactosyltransferase
GLYMA_U027000	mRNA	-1.94835	2.48085e-05	1.02359e-05	receptor-like protein kinase FERONIA
GLYMA_07G027200	mRNA	-3.37267	2.76611e-31	4.12937e-32	transcription factor bHLH18
GLYMA_14G049200	mRNA	-2.55024	5.21763e-23	9.45932e-24	1-aminocyclopropane-1-carboxylate oxidase
GLYMA_13G324900	mRNA	-1.40701	2.34018e-39	2.95561e-40	UDP-xylose transporter 1
GLYMA_13G309800	mRNA	-4.34846	3.52955e-102	2.09896e-103	B-cell receptor-associated protein 31
GLYMA_07G234200	mRNA	1.03268	3.61305e-71	2.90423e-72	squamosa promoter-binding-like protein 1
GLYMA_13G133400	mRNA	-1.29178	9.74677e-53	9.94742e-54	protein SLOW GREEN 1, chloroplastic
GLYMA_13G290700	mRNA	-1.76557	0	0	phosphoenolpyruvate carboxylase 2
GLYMA_19G001200	mRNA	-1.99218	8.93193e-05	3.89401e-05	eukaryotic translation initiation factor 5
GLYMA_11G228300	mRNA	1.3946	6.21436e-06	2.42796e-06	auxin transporter-like protein 11
GLYMA_14G024400	mRNA	-1.3956	2.83599e-62	2.54872e-63	TMV resistance protein N-like
GLYMA_13G165700	mRNA	1.86764	2.20475e-06	8.29901e-07	equilibrative nucleotide transporter 8
GLYMA_02G019100	mRNA	1.4313	1.62333e-55	1.59345e-56	homeobox-leucine zipper protein ATHB-13-like
GLYMA_09G008400	mRNA	-1.52389	2.24238e-34	3.12864e-35	1-aminocyclopropane-1-carboxylate oxidase
GLYMA_17G098700	mRNA	1.16512	9.51569e-05	4.16459e-05	microtubule-associated protein RP/EB family member 1B
GLYMA_01G216000	mRNA	-3.60917	6.33871e-34	8.93728e-35	dehydration-responsive element-binding protein 1E
GLYMA_06G062900	mRNA	-1.46491	1.14891e-124	5.73282e-126	stromal cell-derived factor 2-like protein-like
GLYMA_06G258500	mRNA	-5.12028	4.31898e-05	1.82557e-05	G-type lectin S-receptor-like serine/threonine-protein kinase At4g27290
GLYMA_04G040300	mRNA	-4.2221	1.29928e-210	4.04575e-212	transferase family protein
GLYMA_05G027400	mRNA	1.2772	1.16674e-20	2.27017e-21	transcription factor TCP14
GLYMA_17G011300	mRNA	5.05464	5.46478e-05	2.33395e-05	wall-associated receptor kinase 2
GLYMA_11G030900	mRNA	-6.91546	1.17039e-14	2.79953e-15	uncharacterized LOC100806286
GLYMA_12G145400	mRNA	-1.16808	1.87787e-13	4.72706e-14	receptor-like serine/threonine-protein kinase SD1-7
GLYMA_01G011600	mRNA	-3.8967	5.41857e-303	1.19083e-304	uncharacterized LOC100808014
GLYMA_01G024500	mRNA	-1.72314	3.11341e-07	1.09846e-07	uncharacterized LOC102668650
GLYMA_08G105400	mRNA	-1.92591	3.67556e-14	8.9837e-15	agamous-like MADS-box protein AGL3-like
GLYMA_13G242700	mRNA	-1.56022	2.64848e-43	3.12762e-44	uncharacterized protein At4g04980
GLYMA_07G270900	mRNA	2.05479	3.41581e-11	9.51677e-12	START domain-containing protein 10
GLYMA_05G170800	mRNA	2.07297	1.74254e-22	3.20855e-23	lysine-specific demethylase JMJ18-like
GLYMA_05G050100	mRNA	1.36745	0	0	protein HOTHEAD
GLYMA_11G183400	mRNA	-1.00915	2.11392e-51	2.19491e-52	MYB-CC domain-containing transcription factor PHR19
GLYMA_19G252600	mRNA	-1.00476	5.46201e-47	6.08082e-48	common plant regulatory factor 1
GLYMA_11G145400	mRNA	1.02185	6.47414e-57	6.23671e-58	GATA transcription factor 11
GLYMA_10G046000	mRNA	-1.92591	2.49194e-06	9.42183e-07	exocyst complex component EXO70H1
GLYMA_06G302400	mRNA	-5.20275	2.42904e-05	1.00126e-05	uncharacterized LOC100784602
GLYMA_02G292700	mRNA	-4.61778	0.000816882	0.000396525	stigma-specific STIG1-like protein 1
GLYMA_02G292700	mRNA	1.36354	1.0911e-43	1.27868e-44	protein NRT1/ PTR FAMILY 4.6
GLYMA_11G070600	mRNA	-3.70485	2.40735e-182	8.52664e-184	isoflavone reductase
GLYMA_10G081300	mRNA	1.10148	5.0576e-170	1.89479e-171	receptor protein kinase TMK1
GLYMA_02G116200	mRNA	-2.2316	1.40908e-25	2.39438e-26	2-hydroxy-6-oxononadienedioate/2-hydroxy-6-oxononatrienedioate hydrolase-like
GLYMA_12G221400	mRNA	-3.12028	0.00046977	0.000221557	NAC transcription factor 56
GLYMA_02G018500	mRNA	-1.10964	4.723e-13	1.21027e-13	phytochrome A-associated F-box protein-like
GLYMA_17G236900	mRNA	-1.01499	1.38169e-65	1.19652e-66	uncharacterized LOC100800191
GLYMA_11G096300	mRNA	1.93555	9.40631e-77	7.10442e-78	uncharacterized LOC100815712
GLYMA_11G058100	mRNA	-3.20275	2.32151e-20	4.56009e-21	peroxidase 10
GLYMA_03G142100	mRNA	-4.54288	9.01416e-145	3.91044e-146	cytochrome P450 93A3
GLYMA_18G165000	mRNA	2.20263	2.78864e-31	4.16375e-32	uncharacterized LOC100795449
GLYMA_10G079400	mRNA	1.47497	3.09538e-07	1.09167e-07	NDR1/HIN1-like protein 10
GLYMA_05G248200	mRNA	3.93681	1.03056e-10	2.94571e-11	zinc-finger homeodomain protein 8-like
GLYMA_04G060600	mRNA	3.2402	2.49975e-11	6.91139e-12	early nodulin-like protein
GLYMA_11G073100	mRNA	2.01157	7.19155e-265	1.79225e-266	beta-galactosidase 3
GLYMA_04G061400	mRNA	-3.86636	9.46867e-116	5.04996e-117	probable WRKY transcription factor 40
GLYMA_14G062300	mRNA	-1.35942	2.53549e-29	3.93995e-30	laccase-4
GLYMA_03G233300	mRNA	1.30515	7.77631e-24	1.38118e-24	probable protein phosphatase 2C 5
GLYMA_06G024700	mRNA	1.33491	2.26183e-10	6.58228e-11	WEB family protein At1g75720
GLYMA_03G218600	mRNA	1.43848	1.52511e-119	7.85949e-121	uncharacterized LOC100800231
GLYMA_13G369800	mRNA	-1.55845	3.52491e-40	4.39809e-41	cinnamoyl-CoA reductase
GLYMA_13G353400	mRNA	-1.16352	3.57868e-07	1.26852e-07	ATP-dependent 6-phosphofructokinase 3
GLYMA_10G023100	mRNA	1.25406	1.61253e-07	5.56636e-08	LRR receptor-like serine/threonine-protein kinase GSO2
GLYMA_20G247700	mRNA	-1.85952	1.12861e-223	3.29581e-225	clathrin interactor EPSIN 2
GLYMA_11G000600	mRNA	2.54906	0	0	uncharacterized protein At4g06744
GLYMA_13G302100	mRNA	1.10245	0	0	protein THYLAKOID FORMATION1, chloroplastic
GLYMA_18G238000	mRNA	-1.14783	1.41821e-48	1.53867e-49	heavy metal-associated domain-containing protein
GLYMA_18G003100	mRNA	-1.46808	8.99718e-70	7.37928e-71	crocetin glucosyltransferase, chloroplastic
GLYMA_18G211100	mRNA	-5.88889	0	0	cationic peroxidase 1
GLYMA_19G015500	mRNA	1.73486	8.10299e-207	2.56512e-208	uncharacterized LOC100305542
GLYMA_06G271200	mRNA	-1.31931	5.25158e-78	3.90342e-79	cyclic nucleotide-gated ion channel 4
GLYMA_10G185500	mRNA	3.22844	1.06645e-29	1.64496e-30	sieve element occlusion by forisomes 1
GLYMA_18G102400	mRNA	-1.32863	1.78837e-44	2.07046e-45	septum-promoting GTP-binding protein 1
GLYMA_13G109800	mRNA	-6.0101	4.59874e-16	1.04727e-16	12-oxophytodienoate reductase 3
GLYMA_16G021300	mRNA	-1.02671	9.19312e-38	1.19567e-38	cytochrome b5-like heme/steroid binding domain-containing protein
GLYMA_19G070000	mRNA	-5.07721	7.72193e-09	2.45291e-09	uncharacterized LOC100813973
GLYMA_20G093000	mRNA	1.27309	9.25072e-23	1.68922e-23	protein transport protein sec31
GLYMA_19G034900	mRNA	2.90578	9.61176e-16	2.21667e-16	extensin
GLYMA_03G132900	mRNA	-3.0516	0	0	glucan endo-1,3-beta-glucosidase
GLYMA_06G129300	mRNA	3.00476	0	0	protein IQ-DOMAIN 19
GLYMA_13G036300	mRNA	-5.54062	1.07574e-22	1.96669e-23	probable receptor-like serine/threonine-protein kinase At4g34500
GLYMA_09G017900	mRNA	4.05464	0.00012312	5.45036e-05	aspartyl protease family protein At5g10770
GLYMA_05G000900	mRNA	1.18399	2.96251e-58	2.80217e-59	actin
GLYMA_16G150600	mRNA	1.32785	5.38714e-26	9.06449e-27	omega-hydroxypalmitate O-feruloyl transferase
GLYMA_15G194600	mRNA	-2.26729	2.22966e-218	6.65707e-220	putative inositol transporter
GLYMA_06G023700	mRNA	-1.70659	1.64355e-12	4.32184e-13	uncharacterized LOC100814019
GLYMA_02G005800	mRNA	-6.1621	1.11825e-17	2.40847e-18	inorganic phosphate transporter 1-14
GLYMA_08G261200	mRNA	-1.08199	3.70384e-25	6.35535e-26	homocysteine S-methyltransferase 1
GLYMA_01G154400	mRNA	-1.0665	6.80596e-12	1.83292e-12	ABC transporter G family member 14
GLYMA_15G107700	mRNA	1.05464	7.63333e-06	3.00463e-06	uncharacterized LOC100796798
GLYMA_19G195300	mRNA	1.10468	0.000634408	0.000304032	kinesin-like protein KIN-5C
GLYMA_20G239900	mRNA	5.21511	1.76942e-05	7.20143e-06	uncharacterized LOC100798512
GLYMA_04G059500	mRNA	-1.11276	1.96357e-41	2.39269e-42	protein ENHANCED DISEASE RESISTANCE 2-like
GLYMA_11G249800	mRNA	2.25946	7.73885e-36	1.04767e-36	ELMO domain-containing protein B
GLYMA_13G059500	mRNA	1.23827	3.18991e-84	2.23794e-85	cupredoxin domain-containing protein
GLYMA_12G216500	mRNA	4.1371	1.08794e-08	3.48763e-09	uncharacterized LOC100795500
GLYMA_06G093400	mRNA	-1.78915	1.80057e-07	6.23855e-08	AT-hook motif nuclear-localized protein 17
GLYMA_13G216400	mRNA	-1.03865	8.56115e-21	1.65924e-21	acyl-CoA-binding domain-containing protein 6
GLYMA_15G139000	mRNA	-3.29156	2.37694e-13	6.00798e-14	probable WRKY transcription factor 48
GLYMA_13G231300	mRNA	1.0357	1.73949e-63	1.54289e-64	GDSL esterase/lipase At5g45910-like
GLYMA_06G263900	mRNA	-1.69449	5.78328e-251	1.50909e-252	disease resistance protein TAO1
GLYMA_05G215900	mRNA	-3.04433	0	0	probable WRKY transcription factor 41
GLYMA_15G172800	mRNA	-3.36717	1.1909e-20	2.31847e-21	uncharacterized LOC100814053
GLYMA_15G270400	mRNA	1.01719	8.13814e-20	1.62563e-20	O-fucosyltransferase 20
GLYMA_12G207900	mRNA	-1.45366	1.057e-06	3.88387e-07	uncharacterized LOC100305599
GLYMA_08G110500	mRNA	-7.06844	4.9146e-16	1.12121e-16	chalcone synthase 5-like
GLYMA_08G015300	mRNA	2.33702	6.62582e-51	6.93024e-52	aquaporin PIP1-3
GLYMA_10G217400	mRNA	2.46968	1.19096e-05	4.76661e-06	uncharacterized LOC100305600
GLYMA_08G314100	mRNA	3.08266	1.74904e-05	7.113e-06	uncharacterized LOC100792578
GLYMA_06G194900	mRNA	1.22818	0	0	chlorophyll a-b binding protein P4, chloroplastic
GLYMA_17G242900	mRNA	-2.52955	0	0	phosphatidate phosphatase PAH2
GLYMA_09G010300	mRNA	-1.8103	2.15152e-08	7.02274e-09	rho GDP-dissociation inhibitor 1
GLYMA_07G151900	mRNA	-2.92385	3.48143e-07	1.23291e-07	beta-glucosidase 11
GLYMA_17G237100	mRNA	-1.61412	0	0	peamaclein
GLYMA_10G014000	mRNA	2.75974	2.33902e-30	3.55302e-31	uncharacterized LOC100780225
GLYMA_15G059900	mRNA	-1.25183	2.94149e-92	1.9241e-93	heat shock 70 kDa protein, mitochondrial
GLYMA_10G061800	mRNA	-3.51127	0	0	thaumatin-like protein 1b
GLYMA_07G176600	mRNA	2.19984	1.39237e-06	5.15583e-07	codeine O-demethylase
GLYMA_08G358100	mRNA	-1.34094	0.00034032	0.000157935	dof zinc finger protein DOF2.4
GLYMA_11G256100	mRNA	4.61104	1.17619e-06	4.33371e-07	uncharacterized LOC100305590
GLYMA_16G137300	mRNA	-1.85345	2.71246e-74	2.10932e-75	TMV resistance protein N
GLYMA_13G285300	mRNA	-4.91274	0	0	cytochrome P450 82A2-like
GLYMA_13G181900	mRNA	-1.34402	4.11744e-05	1.73702e-05	cytochrome P450 71A26
GLYMA_02G126800	mRNA	-2.0623	6.79133e-50	7.22002e-51	LAG1 longevity assurance homolog 3-like
GLYMA_16G209600	mRNA	-1.07871	4.08787e-67	3.47761e-68	uncharacterized LOC100812281
GLYMA_14G090200	mRNA	3.58071	1.63787e-59	1.52332e-60	amino acid transporter AVT6A
GLYMA_01G224500	mRNA	2.96718	2.63695e-06	9.99058e-07	probable GABA transporter 2
GLYMA_01G009700	mRNA	2.95324	2.3055e-34	3.22142e-35	uncharacterized LOC100812276
GLYMA_18G301900	mRNA	-1.38882	3.21616e-52	3.30342e-53	LITAF-like zinc ribbon domain-containing protein
GLYMA_13G154300	mRNA	-2.22784	1.22495e-11	3.33866e-12	uncharacterized LOC100795534
GLYMA_14G008000	mRNA	1.17053	0	0	chlorophyll a-b binding protein
GLYMA_13G220100	mRNA	1.72723	1.01936e-27	1.64488e-28	protein kinase PINOID
GLYMA_05G245600	mRNA	-2.54327	0	0	calcium-binding EF-hand family protein
GLYMA_17G212200	mRNA	1.81318	0	0	AAI_LTSS superfamily protein
GLYMA_09G077600	mRNA	1.07103	0	0	50S ribosomal protein L18, chloroplastic
GLYMA_17G104600	mRNA	-3.09583	4.11451e-102	2.44795e-103	uncharacterized LOC100306310
GLYMA_16G178800	mRNA	-1.94611	4.29142e-24	7.54963e-25	heat shock protein 83
GLYMA_06G0515001	mRNA	-1.38646	3.32584e-47	3.68631e-48	pollen-specific protein SF21-like
GLYMA_13G157800	mRNA	1.22682	2.35048e-18	4.94386e-19	protein YABBY 13
GLYMA_02G124700	mRNA	-5.06524	2.6725e-169	1.00487e-170	protein SRG1
GLYMA_10G060800	mRNA	-3.83172	0	0	thaumatin-like protein 1b
GLYMA_03G147700	mRNA	-3.35475	8.16384e-05	3.54601e-05	pterocarpan synthase-like protein
GLYMA_07G046400	mRNA	-1.46968	1.02643e-08	3.28571e-09	RING-H2 finger protein ATL3
GLYMA_07G261800	mRNA	1.81905	1.33205e-102	7.86701e-104	L-ascorbate oxidase homolog
GLYMA_20G089900	mRNA	2.52789	3.28071e-09	1.01803e-09	uncharacterized LOC100500628
GLYMA_02G233300	mRNA	1.73564	4.18879e-43	4.96602e-44	uncharacterized LOC100306300
GLYMA_05G180700	mRNA	-2.22073	4.32799e-69	3.5863e-70	probable glucan 1,3-beta-glucosidase A
GLYMA_12G100400	mRNA	-2.39539	7.3733e-06	2.89825e-06	vascular-related unknown protein 1
GLYMA_05G133900	mRNA	1.11726	7.83705e-136	3.61348e-137	uncharacterized LOC100804718
GLYMA_10G246000	mRNA	1.76924	5.28182e-13	1.3565e-13	type IV inositol polyphosphate 5-phosphatase 7
GLYMA_07G173000	mRNA	-1.75239	0	0	G-type lectin S-receptor-like serine/threonine-protein kinase At1g34300
GLYMA_07G125600	mRNA	1.08947	1.08727e-36	1.4491e-37	uncharacterized LOC100775516
GLYMA_08G107100	mRNA	1.2013	3.10406e-13	7.88646e-14	uncharacterized LOC100820280
GLYMA_11G085500	mRNA	2.66762	6.89545e-05	2.97355e-05	RWP-RK domain-containing protein
GLYMA_14G056200	mRNA	-1.34157	1.29702e-07	4.44575e-08	dehydration-responsive element-binding protein 2A2
GLYMA_06G195100	mRNA	2.2262	8.23694e-86	5.7114e-87	thioredoxin-like 1-1, chloroplastic-like
GLYMA_11G038600	mRNA	-4.90729	7.17512e-42	8.67471e-43	uncharacterized LOC100306332
GLYMA_09G017400	mRNA	-1.29027	7.47552e-224	2.17692e-225	MYB-CC domain-containing transcription factor PHR14
GLYMA_02G093100	mRNA	3.46361	3.42967e-45	3.92951e-46	uncharacterized LOC100784512
GLYMA_16G185800	mRNA	-2.38949	1.39261e-07	4.78482e-08	receptor-like protein EIX1
GLYMA_01G133500	mRNA	1.09356	1.1769e-07	4.02184e-08	transcription factor UNE10
GLYMA_04G032800	mRNA	-2.11374	2.41257e-07	8.44351e-08	uncharacterized LOC100500653
GLYMA_10G031200	mRNA	2.68965	8.2864e-11	2.35725e-11	uncharacterized LOC100306323
GLYMA_01G226100	mRNA	2.05334	1.55754e-30	2.35701e-31	uncharacterized LOC100820289
GLYMA_05G147000	mRNA	-1.48739	2.87618e-06	1.09287e-06	putative caffeoyl-CoA 3-O-methyltransferase
GLYMA_14G014100	mRNA	-2.55067	6.97089e-28	1.11876e-28	two-pore potassium channel 1
GLYMA_14G080200	mRNA	-2.1876	1.21189e-62	1.08517e-63	uncharacterized LOC100500655
GLYMA_11G081000	mRNA	-1.33926	6.55298e-103	3.8487e-104	uncharacterized LOC100500650
GLYMA_15G239700	mRNA	8.21092	1.08904e-31	1.61121e-32	uncharacterized LOC100306319
GLYMA_09G163700	mRNA	-6.45909	2.81711e-21	5.36845e-22	kunitz family trypsin inhibitor
GLYMA_16G187700	mRNA	-2.90547	1.07113e-12	2.79297e-13	receptor-like protein EIX1
GLYMA_16G217400	mRNA	2.23021	0.000620554	0.00029691	NAC domain-containing protein 86
GLYMA_01G096800	mRNA	-1.44786	1.1e-09	3.32205e-10	protein HAIKU1
GLYMA_05G201300	mRNA	1.09175	0	0	acyl carrier protein 1, chloroplastic
GLYMA_08G130800	mRNA	-2.63689	1.8942e-23	3.39639e-24	E3 ubiquitin-protein ligase RGLG5
GLYMA_10G264000	mRNA	1.66762	2.17855e-07	7.59565e-08	heavy metal-associated isoprenylated plant protein 37
GLYMA_10G279200	mRNA	2.06179	5.52499e-11	1.55559e-11	uncharacterized LOC100784536
GLYMA_18G258700	mRNA	1.70414	2.97321e-05	1.2359e-05	transcription factor bHLH135-like
GLYMA_09G261200	mRNA	-2.40628	1.12038e-08	3.59467e-09	FT-interacting protein 1
GLYMA_17G242400	mRNA	-4.78626	0	0	alpha-amylase-like
GLYMA_17G185000	mRNA	-1.93575	3.28836e-56	3.20184e-57	NAC domain-containing protein 68-like
GLYMA_13G095400	mRNA	-3.03282	1.54035e-06	5.73173e-07	CASP-like protein 3
GLYMA_04G007100	mRNA	4.32864	6.20804e-41	7.62569e-42	ARG7 auxin responsive family protein-like protein
GLYMA_01G006000	mRNA	1.44477	7.36696e-164	2.86041e-165	uncharacterized LOC100306340
GLYMA_02G257700	mRNA	-3.78771	1.30891e-06	4.83665e-07	probable 2-oxoglutarate-dependent dioxygenase At5g05600
GLYMA_10G158900	mRNA	-1.15406	9.9917e-135	4.63691e-136	uncharacterized LOC100784520
GLYMA_05G034500	mRNA	-2.19598	0	0	uncharacterized LOC100306333
GLYMA_11G226000	mRNA	-1.66113	8.9053e-40	1.11987e-40	proline transporter 1
GLYMA_09G064200	mRNA	-2.05836	1.34477e-13	3.36753e-14	putative transcription factor bHLH041
GLYMA_04G136000	mRNA	4.02431	0	0	aspartyl protease AED3
GLYMA_02G196200	mRNA	-3.35475	4.17993e-14	1.02347e-14	E3 ubiquitin-protein ligase PUB24-like
GLYMA_04G179300	mRNA	-1.66074	1.40126e-98	8.6043e-100	U-box domain-containing protein 38
GLYMA_17G095200	mRNA	1.48175	0.000844638	0.000410827	uncharacterized LOC100800184
GLYMA_17G030100	mRNA	-4.08593	1.1442e-89	7.64984e-91	pathogenesis-related protein
GLYMA_10G059400	mRNA	-1.18663	1.73078e-05	7.03472e-06	alpha carbonic anhydrase 7
GLYMA_18G025100	mRNA	-2.08831	7.76301e-149	3.28301e-150	probable inactive receptor-like protein kinase At3g56050
GLYMA_17G114300	mRNA	-2.70185	4.27692e-25	7.34803e-26	uncharacterized LOC100306355
GLYMA_09G277800	mRNA	-7.31935	0	0	peroxidase
GLYMA_06G193800	mRNA	1.81672	0	0	gibberellin-regulated protein-like
GLYMA_17G032000	mRNA	-2.11874	4.41488e-107	2.51109e-108	GTP-binding protein SAR1A-like
GLYMA_07G121000	mRNA	-1.7382	1.06542e-217	3.1868e-219	UMP/CMP kinase family protein
GLYMA_17G169100	mRNA	1.05372	2.67865e-24	4.68535e-25	probable iron/ascorbate oxidoreductase DDB_G0283291-like
GLYMA_13G299000	mRNA	4.92138	3.80178e-08	1.25689e-08	protein EPIDERMAL PATTERNING FACTOR 1
GLYMA_07G045700	mRNA	-1.69795	7.58169e-20	1.51282e-20	uncharacterized LOC100306604
GLYMA_07G220300	mRNA	6.45903	1.95578e-11	5.38447e-12	cytochrome P450 89A2
GLYMA_02G059300	mRNA	-1.23342	5.80849e-103	3.40828e-104	elongation of fatty acids protein 3-like
GLYMA_18G167600	mRNA	-2.13836	8.63177e-29	1.36061e-29	probable transmembrane GTPase FZO-like, chloroplastic
GLYMA_07G120900	mRNA	-2.48533	1.97165e-15	4.59057e-16	dynamin-related protein 1E
GLYMA_09G116700	mRNA	1.48227	5.80926e-18	1.23867e-18	uncharacterized LOC100789277
GLYMA_04G190800	mRNA	-3.65001	0	0	uncharacterized LOC100527085
GLYMA_19G250400	mRNA	7.86139	6.00391e-26	1.01137e-26	GDSL esterase/lipase At5g33370
GLYMA_09G221900	mRNA	1.09286	3.73821e-05	1.57102e-05	auxin-induced protein 10A5-like
GLYMA_20G163600	mRNA	-2.26986	3.44612e-05	1.44197e-05	probable membrane-associated kinase regulator 5
GLYMA_03G040900	mRNA	-2.25521	0.000154307	6.90311e-05	putative LURP-one-related protein
GLYMA_08G364100	mRNA	-4.05519	6.11539e-15	1.44685e-15	probable carboxylesterase 17
GLYMA_15G023200	mRNA	2.39168	3.02562e-14	7.37038e-15	inactive protein kinase SELMODRAFT_444075
GLYMA_20G243800	mRNA	1.36772	4.55806e-05	1.93209e-05	protein PHOTOSYSTEM I ASSEMBLY 2, chloroplastic-like
GLYMA_15G002300	mRNA	1.42286	4.0758e-56	3.973e-57	aspartyl protease family protein At5g10770
GLYMA_15G243000	mRNA	2.87407	7.92635e-06	3.12418e-06	glucan endo-1,3-beta-glucosidase
GLYMA_15G258100	mRNA	-2.3367	4.21957e-245	1.12177e-246	LOB domain-containing protein 4-like
GLYMA_11G243400	mRNA	-3.49225	5.51828e-18	1.17513e-18	RING/U-box superfamily protein
GLYMA_18G293600	mRNA	-5.24227	7.81406e-10	2.34038e-10	uncharacterized LOC100306593
GLYMA_13G033900	mRNA	-1.75948	7.18782e-284	1.68745e-285	rust resistance kinase Lr10
GLYMA_17G090500	mRNA	-2.26063	4.48618e-12	1.19962e-12	uncharacterized LOC100787505
GLYMA_09G040500	mRNA	-4.06152	1.62263e-195	5.40657e-197	pathogenesis-related protein 10
GLYMA_04G225500	mRNA	-1.5395	1.35301e-258	3.45309e-260	protein RESPONSE TO LOW SULFUR 3
GLYMA_16G220600	mRNA	2.59521	4.44487e-49	4.78725e-50	mucin-5AC
GLYMA_09G182000	mRNA	-1.32641	1.21833e-30	1.84004e-31	LEAF RUST 10 DISEASE-RESISTANCE LOCUS RECEPTOR-LIKE PROTEIN KINASE-like 2.5
GLYMA_17G074300	mRNA	-1.8218	7.02297e-52	7.25563e-53	BTB/POZ domain-containing protein At2g24240
GLYMA_02G009500	mRNA	-2.00857	7.00561e-20	1.39711e-20	putative NIM1-interacting family protein
GLYMA_17G069500	mRNA	-2.30718	1.09443e-23	1.94923e-24	uncharacterized LOC100306600
GLYMA_03G015800	mRNA	-3.19104	2.96042e-88	2.01074e-89	C2 domain-containing protein
GLYMA_18G152300	mRNA	4.77453	0.000305213	0.000140926	uncharacterized LOC100808210
GLYMA_11G154900	mRNA	-1.52598	0	0	repetitive proline-rich cell wall protein 3
GLYMA_10G017500	mRNA	-1.12428	3.03031e-64	2.66634e-65	uncharacterized protein At5g01610
GLYMA_10G237800	mRNA	-2.54062	8.84112e-27	1.45942e-27	heat stress transcription factor 19
GLYMA_07G257300	mRNA	1.33948	2.39804e-60	2.21071e-61	heavy metal-associated isoprenylated plant protein 33
GLYMA_19G115600	mRNA	-2.39774	7.14483e-23	1.30058e-23	plant cysteine oxidase 2
GLYMA_15G071300	mRNA	1.45715	6.34509e-39	8.08988e-40	stem-specific protein TSJT1-like
GLYMA_11G077700	mRNA	-1.51575	6.27257e-92	4.11843e-93	thaumatin-like protein 1
GLYMA_07G080300	mRNA	1.06182	2.54805e-16	5.7471e-17	transcription factor TCP9
GLYMA_09G164100	mRNA	-2.59576	1.63881e-10	4.73368e-11	putative GEM-like protein 8
GLYMA_02G072400	mRNA	1.61926	4.45744e-18	9.45329e-19	arabinogalactan protein 14
GLYMA_07G214000	mRNA	3.0028	7.59206e-08	2.55967e-08	replication protein A 70 kDa DNA-binding subunit B
GLYMA_02G128700	mRNA	-1.91418	4.75651e-15	1.1212e-15	uncharacterized LOC102661207
GLYMA_14G010700	mRNA	2.35622	8.3361e-43	9.93967e-44	uncharacterized LOC102665099
GLYMA_02G303200	mRNA	1.78821	8.24642e-06	3.25416e-06	uncharacterized LOC100306625
GLYMA_08G022900	mRNA	-2.18482	1.45934e-10	4.20196e-11	putative RING-H2 finger protein ATL21B
GLYMA_18G259400	mRNA	5.04956	0	0	gibberellin-regulated protein 4-like
GLYMA_15G225200	mRNA	-5.73326	2.70337e-07	9.50437e-08	putative disease resistance RPP13-like protein 1
GLYMA_18G289100	mRNA	-1.05251	7.2563e-70	5.94354e-71	heat shock cognate 70 kDa protein 2
GLYMA_18G286900	mRNA	-1.50926	1.15137e-05	4.60311e-06	uncharacterized LOC100527107
GLYMA_11G212100	mRNA	-2.30584	9.6233e-16	2.21959e-16	IQ domain-containing protein IQM3-like
GLYMA_15G008300	mRNA	-4.61025	2.20326e-44	2.55379e-45	uncharacterized LOC100306632
GLYMA_16G049400	mRNA	1.08896	5.39937e-117	2.85169e-118	transcription factor ICE1-like
GLYMA_10G286500	mRNA	-1.83662	2.95006e-77	2.20963e-78	transmembrane protein 53
GLYMA_08G020800	mRNA	1.99496	0	0	probable inactive receptor kinase At4g23740
GLYMA_06G065000	mRNA	-1.49539	1.11909e-115	5.97153e-117	cellulose synthase A catalytic subunit 8 [UDP-forming]
GLYMA_13G082400	mRNA	-1.10379	5.14965e-23	9.33467e-24	uncharacterized LOC100806523
GLYMA_13G322300	mRNA	-3.31822	6.26674e-37	8.29926e-38	arp2/3 complex-activating protein rickA
GLYMA_18G267000	mRNA	-1.04568	2.60532e-55	2.56519e-56	LRR receptor-like serine/threonine-protein kinase RPK2
GLYMA_10G018800	mRNA	-4.55638	3.09373e-32	4.52988e-33	E3 ubiquitin-protein ligase BAH1
GLYMA_18G009900	mRNA	5.42661	3.33416e-06	1.27271e-06	mitotic spindle checkpoint protein MAD2
GLYMA_10G265100	mRNA	-3.84018	0.000570572	0.000271697	uncharacterized LOC100789312
GLYMA_10G200700	mRNA	-1.98197	0	0	glycosyltransferase family protein 64 protein C5
GLYMA_10G261600	mRNA	1.82217	2.69424e-61	2.45365e-62	receptor protein kinase-like protein At4g34220
GLYMA_15G129400	mRNA	-1.02284	2.89226e-12	7.68037e-13	nuclear intron maturase 2, mitochondrial
GLYMA_15G063000	mRNA	1.61327	7.55658e-125	3.76644e-126	transcription factor ILR3
GLYMA_09G043900	mRNA	1.21098	1.9008e-31	2.82723e-32	putative E3 ubiquitin-protein ligase LIN-1
GLYMA_11G124500	mRNA	-2.6888	3.1284e-207	9.87781e-209	uncharacterized LOC100527091
GLYMA_15G042500	mRNA	4.0784	1.45431e-141	6.45172e-143	3-ketoacyl-CoA synthase 12
GLYMA_17G030400	mRNA	-6.98119	6.17895e-114	3.33251e-115	uncharacterized LOC100527097
GLYMA_02G051300	mRNA	7.68142	2.16129e-23	3.88001e-24	LRR receptor-like serine/threonine-protein kinase GSO2
GLYMA_10G079700	mRNA	-3.78057	9.96439e-247	2.63272e-248	NDR1/HIN1-like protein 10
GLYMA_13G164600	mRNA	-1.78236	2.13653e-25	3.6474e-26	uncharacterized LOC100306623
GLYMA_04G178500	mRNA	-4.03282	2.04671e-82	1.45656e-83	uncharacterized LOC100527101
GLYMA_05G059800	mRNA	1.7377	6.02176e-16	1.3779e-16	zinc finger protein ZAT4
GLYMA_10G283800	mRNA	1.95137	2.77398e-161	1.09825e-162	hippocampus abundant transcript-like protein 1
GLYMA_17G192300	mRNA	-1.05949	6.4685e-28	1.03725e-28	endoribonuclease YBEY, chloroplastic-like
GLYMA_02G134500	mRNA	-1.49472	1.34424e-21	2.5371e-22	uncharacterized LOC100803045
GLYMA_20G069000	mRNA	2.56922	5.44966e-13	1.40079e-13	uncharacterized LOC100806503
GLYMA_16G008700	mRNA	-1.16185	3.87792e-72	3.08436e-73	linoleate 13S-lipoxygenase 3-1, chloroplastic
GLYMA_08G109500	mRNA	-2.55527	5.88211e-125	2.93023e-126	chalcone synthase 1
GLYMA_11G125400	mRNA	-1.12674	1.14544e-22	2.09505e-23	peroxisomal membrane protein 13
GLYMA_11G150300	mRNA	-1.87717	1.9611e-16	4.40881e-17	dirigent domain-containing protein
GLYMA_07G253100	mRNA	-1.40943	5.83094e-40	7.31511e-41	putative histidine-containing phosphotransfer protein
GLYMA_08G293800	mRNA	3.36928	4.90305e-28	7.84354e-29	uncharacterized LOC100306651
GLYMA_19G187400	mRNA	-1.43181	2.66059e-40	3.30879e-41	UDP-glucosyltransferase family protein
GLYMA_11G215200	mRNA	-1.0283	4.35553e-175	1.58901e-176	aspartic proteinase PCS1
GLYMA_02G018900	mRNA	3.28911	2.98902e-08	9.82812e-09	transcription factor PRE6
GLYMA_09G022400	mRNA	-1.47063	1.60764e-21	3.04214e-22	peroxidase 15-like protein
GLYMA_11G022200	mRNA	-1.138	0	0	homeobox protein BEL1 homolog
GLYMA_03G000200	mRNA	1.1516	0.000153255	6.85481e-05	pentatricopeptide repeat-containing protein At2g22070-like
GLYMA_07G055000	mRNA	1.07387	3.19303e-21	6.09702e-22	ethylene-responsive transcription factor ERF023
GLYMA_19G257300	mRNA	-5.35475	7.7482e-06	3.05217e-06	LOB domain-containing protein 1
GLYMA_11G130900	mRNA	2.16358	1.17221e-13	2.92772e-14	histone H3.2
GLYMA_19G249800	mRNA	2.96718	5.32305e-05	2.27088e-05	uncharacterized LOC100789333
GLYMA_17G059700	mRNA	-1.16167	1.23071e-70	9.96981e-72	uncharacterized LOC100818700
GLYMA_04G181500	mRNA	1.9572	9.16614e-59	8.62255e-60	serine/threonine-protein kinase HT1
GLYMA_06G012100	mRNA	-1.27744	3.62891e-13	9.24767e-14	isoflavone reductase homolog PCBER
GLYMA_19G117400	mRNA	-1.32655	1.46183e-05	5.89994e-06	protein PNS1
GLYMA_10G082400	mRNA	-1.01842	5.0459e-47	5.60793e-48	syntaxin-121
GLYMA_02G105300	mRNA	1.71441	4.90011e-05	2.08163e-05	scopoletin glucosyltransferase
GLYMA_03G228900	mRNA	-1.26322	6.39188e-60	5.91173e-61	ATP-citrate synthase alpha chain protein 2
GLYMA_10G021700	mRNA	4.83225	4.55638e-47	5.05891e-48	uncharacterized LOC100527115
GLYMA_03G218700	mRNA	1.87754	3.38627e-60	3.12543e-61	probable beta-D-xylosidase 2
GLYMA_20G112400	mRNA	4.84982	1.94622e-14	4.70064e-15	ovate transcriptional repressor domain-containing protein
GLYMA_07G141300	mRNA	-1.74742	2.28922e-12	6.05216e-13	uncharacterized LOC100527120
GLYMA_06G004500	mRNA	1.93065	6.08468e-05	2.60758e-05	auxin transporter-like protein 7
GLYMA_14G056500	mRNA	-1.13578	2.1678e-196	7.18756e-198	cytosolic endo-beta-N-acetylglucosaminidase 1
GLYMA_09G226700	mRNA	1.36988	0	0	serine carboxypeptidase-like 40
GLYMA_06G310100	mRNA	-2.29662	3.57582e-190	1.2207e-191	probable carboxylesterase 15
GLYMA_03G188000	mRNA	1.94179	1.33649e-34	1.85451e-35	uncharacterized protein At3g50808
GLYMA_09G273600	mRNA	-1.42367	3.31766e-105	1.91687e-106	S6 Kinase 1
GLYMA_09G044500	mRNA	-2.23291	5.78396e-103	3.39231e-104	ABC transporter C family member 14
GLYMA_03G224200	mRNA	-1.3208	1.51719e-25	2.57973e-26	protein FAM192A
GLYMA_18G047800	mRNA	-2.23445	0.000695836	0.000335149	NDR1/HIN1-like protein 6
GLYMA_07G212400	mRNA	-3.59082	7.21695e-22	1.35208e-22	uncharacterized LOC100820426
GLYMA_03G037600	mRNA	2.01511	4.8139e-17	1.05873e-17	uncharacterized LOC100789329
GLYMA_07G119800	mRNA	2.38222	1.4731e-19	2.96708e-20	uncharacterized LOC100820431
GLYMA_03G259800	mRNA	1.0522	4.97401e-32	7.31556e-33	rho GTPase-activating protein 3
GLYMA_13G135700	mRNA	1.6396	4.13562e-05	1.74513e-05	GTPase-activating protein MSB4
GLYMA_12G195600	mRNA	3.1371	9.98678e-06	3.97075e-06	peroxidase 3
GLYMA_07G035900	mRNA	1.43976	6.77166e-78	5.03697e-79	solute carrier family 25 member 44
GLYMA_20G145500	mRNA	1.07297	3.70986e-05	1.55829e-05	uncharacterized LOC100803115
GLYMA_07G205100	mRNA	1.00602	1.81738e-74	1.40782e-75	protein CHUP1, chloroplastic
GLYMA_07G050600	mRNA	-1.97559	2.8137e-45	3.21916e-46	NAC domain-containing protein 43
GLYMA_17G076200	mRNA	-1.1881	2.29242e-08	7.49076e-09	uncharacterized LOC102665166
GLYMA_05G175800	mRNA	-2.77429	1.01945e-17	2.19374e-18	uncharacterized LOC100787601
GLYMA_20G013800	mRNA	-1.07129	2.59204e-23	4.65967e-24	proline-rich antigen homolog
GLYMA_16G037900	mRNA	-1.94781	0	0	uncharacterized LOC100306661
GLYMA_08G288000	mRNA	-6.52467	1.20449e-11	3.2811e-12	probable xyloglucan endotransglucosylase/hydrolase protein 33
GLYMA_16G144600	mRNA	1.58569	1.26939e-59	1.17854e-60	extra-large guanine nucleotide-binding protein 1
GLYMA_02G080200	mRNA	-1.97374	2.53192e-33	3.60855e-34	ethylene-responsive transcription factor ABR1
GLYMA_02G098600	mRNA	-1.46454	6.54223e-17	1.44545e-17	apoptosis-linked gene 2-interacting protein X 1
GLYMA_10G241600	mRNA	2.37053	7.51966e-43	8.96003e-44	subtilisin-like protease SBT1.3
GLYMA_03G200500	mRNA	-1.29586	0.000171777	7.72446e-05	uncharacterized LOC100804851
GLYMA_04G055200	mRNA	-3.46821	8.61909e-24	1.53181e-24	mechanosensitive ion channel protein 10
GLYMA_12G206500	mRNA	-2.35068	9.75374e-47	1.09066e-47	probable serine/threonine-protein kinase clkA
GLYMA_19G228300	mRNA	2.99693	3.79679e-09	1.18267e-09	homeobox protein knotted-1-like 1-like
GLYMA_15G146600	mRNA	-2.60681	3.96438e-20	7.8412e-21	SRPBCC domain-containing protein
GLYMA_17G043700	mRNA	-1.16653	1.56955e-26	2.60672e-27	CCT and tify domains-containing protein
GLYMA_01G232500	mRNA	-1.40165	8.26291e-72	6.59681e-73	cellulose synthase-like protein D2
GLYMA_10G277300	mRNA	1.24729	0.000121681	5.38202e-05	transcription repressor OFP13
GLYMA_09G003300	mRNA	-1.08876	2.80893e-74	2.1851e-75	O-fucosyltransferase 20
GLYMA_10G069500	mRNA	-1.39138	9.92998e-24	1.76695e-24	putative leucine-rich repeat protein kinase family protein
GLYMA_12G058400	mRNA	-1.6554	1.78259e-67	1.51113e-68	uncharacterized LOC100808099
GLYMA_01G200500	mRNA	-2.81996	5.10765e-23	9.25574e-24	type I inositol polyphosphate 5-phosphatase 2-like
GLYMA_05G235200	mRNA	1.68397	4.83591e-30	7.40518e-31	cysteine-rich repeat secretory protein 12-like
GLYMA_18G063200	mRNA	3.65589	1.3267e-48	1.4383e-49	vacuolar cation/proton exchanger 3
GLYMA_13G275500	mRNA	-2.49225	4.41221e-42	5.31631e-43	protein DETOXIFICATION 18
GLYMA_09G036400	mRNA	-5.39037	8.08927e-11	2.30007e-11	nicotianamine synthase-like protein
GLYMA_08G129000	mRNA	2.35117	5.20815e-34	7.32905e-35	subtilisin-like protease SBT2.2
GLYMA_05G068800	mRNA	5.39344	4.61019e-11	1.29211e-11	putative invertase inhibitor
GLYMA_19G022500	mRNA	4.59556	2.42398e-247	6.39786e-249	uncharacterized LOC100305480
GLYMA_12G173800	mRNA	-1.61778	1.38303e-124	6.90857e-126	fasciclin-like arabinogalactan protein 12
GLYMA_16G038900	mRNA	-2.3213	0	0	uncharacterized LOC100814063
GLYMA_13G196500	mRNA	-1.5624	1.84589e-167	6.99099e-169	NADPH:quinone oxidoreductase
GLYMA_07G201900	mRNA	1.1835	6.87944e-05	2.9658e-05	FHA domain-containing protein At4g14490
GLYMA_17G093900	mRNA	-2.36067	4.75473e-96	2.98702e-97	two-component response regulator ARR5
GLYMA_17G154100	mRNA	-1.93552	8.34063e-10	2.50401e-10	NAC domain-containing protein 71
GLYMA_14G030700	mRNA	-3.06257	1.67448e-09	5.10632e-10	NAC domain-containing protein 42-like
GLYMA_12G206000	mRNA	2.10468	5.9102e-06	2.30453e-06	reticulon-like protein B17
GLYMA_01G168500	mRNA	1.28205	1.17827e-06	4.34201e-07	B-box zinc finger protein 18
GLYMA_10G000500	mRNA	1.93401	4.48132e-90	2.98022e-91	sieve element occlusion f
GLYMA_04G226700	mRNA	-1.2209	2.60226e-82	1.85617e-83	NAC transcription factor
GLYMA_17G180300	mRNA	-1.32799	9.62816e-28	1.55232e-28	probable disease resistance protein At5g66900
GLYMA_10G144300	mRNA	-1.28173	2.35277e-82	1.67693e-83	S-adenosylmethionine synthase 1
GLYMA_08G344300	mRNA	5.42661	3.33416e-06	1.27271e-06	alpha-amylase inhibitor/lipid transfer/seed storage family protein
GLYMA_13G319700	mRNA	8.17663	4.45588e-31	6.68959e-32	GABA transporter 1
GLYMA_18G028900	mRNA	1.06456	1.38192e-16	3.08601e-17	anthranilate synthase alpha subunit 1, chloroplastic
GLYMA_U009200	mRNA	-1.18005	1.03387e-131	4.90505e-133	BEL1-like homeodomain protein 1
GLYMA_11G018800	mRNA	1.11223	4.24663e-06	1.6352e-06	uncharacterized LOC100778844
GLYMA_06G317000	mRNA	-3.76979	3.10502e-09	9.62153e-10	eugenol synthase 1
GLYMA_04G179500	mRNA	-5.36274	0	0	uncharacterized LOC100305516
GLYMA_17G261000	mRNA	2.18957	0.00024451	0.000111651	calcium-dependent protein kinase 2
GLYMA_10G236300	mRNA	1.73982	5.10928e-199	1.66896e-200	remorin family protein
GLYMA_03G252500	mRNA	5.61721	0	0	GDSL esterase/lipase LTL1
GLYMA_17G009900	mRNA	-2.08345	0.000253387	0.000115912	uncharacterized LOC100792613
GLYMA_03G236300	mRNA	-4.75769	7.18583e-171	2.6784e-172	respiratory burst oxidase homolog protein B
GLYMA_18G204000	mRNA	-1.14603	5.47797e-11	1.54175e-11	dnaJ protein ERDJ3A
GLYMA_13G150700	mRNA	1.25516	1.24203e-06	4.58308e-07	glucomannan 4-beta-mannosyltransferase 9
GLYMA_06G005000	mRNA	2.65168	3.95226e-14	9.67077e-15	probable magnesium transporter NIPA6
GLYMA_06G058900	mRNA	1.20894	8.63885e-10	2.59625e-10	F-box only protein 13
GLYMA_13G070300	mRNA	-1.62512	3.33249e-79	2.45155e-80	xyloglucan glycosyltransferase 4
GLYMA_10G044400	mRNA	-1.42841	3.53909e-149	1.48994e-150	uncharacterized LOC100812338
GLYMA_04G058800	mRNA	1.1988	2.45481e-11	6.78511e-12	uncharacterized LOC100305509
GLYMA_13G351500	mRNA	1.89744	2.96445e-92	1.93993e-93	inactive protein kinase SELMODRAFT_444075-like
GLYMA_04G034400	mRNA	-4.03282	6.72051e-08	2.2595e-08	elongation of fatty acids protein 3-like
GLYMA_04G049300	mRNA	-4.42514	8.68373e-06	3.43253e-06	homeobox-leucine zipper protein HOX15
GLYMA_20G240000	mRNA	1.34789	3.21711e-09	9.9772e-10	beta-hexosaminidase 1
GLYMA_12G140100	mRNA	1.12297	8.1054e-46	9.19164e-47	uncharacterized LOC100790931
GLYMA_02G081300	mRNA	1.68088	8.74069e-08	2.96171e-08	centromere-associated protein E
GLYMA_01G163000	mRNA	-1.43155	1.45718e-147	6.20616e-149	aspartyl protease family protein 1
GLYMA_04G052800	mRNA	-1.0182	2.56544e-46	2.88617e-47	uncharacterized LOC100527044
GLYMA_14G128800	mRNA	2.06671	2.99128e-17	6.53719e-18	cyclin-A2-2
GLYMA_07G174000	mRNA	1.01971	4.24155e-62	3.82e-63	zinc finger protein 7
GLYMA_08G014900	mRNA	-1.59202	9.89361e-27	1.63531e-27	transcription factor EGL1
GLYMA_07G262000	mRNA	1.0654	3.70113e-20	7.31144e-21	uncharacterized LOC100777136
GLYMA_11G091700	mRNA	-1.03003	2.39779e-21	4.55891e-22	ATPase family AAA domain-containing protein 3-B
GLYMA_05G203000	mRNA	-2.81866	0	0	omega-hydroxypalmitate O-feruloyl transferase
GLYMA_11G239600	mRNA	-1.70267	5.55901e-13	1.42996e-13	uncharacterized LOC102662847
GLYMA_06G315200	mRNA	2.42714	0.000105085	4.61889e-05	inactive protein RESTRICTED TEV MOVEMENT 2
GLYMA_19G125300	mRNA	-1.68686	1.58016e-106	9.04796e-108	calmodulin-binding protein 25
GLYMA_02G244700	mRNA	2.72207	3.57091e-17	7.82045e-18	glucan endo-1,3-beta-glucosidase 2
GLYMA_11G040600	mRNA	-2.90729	0.000110674	4.87342e-05	C2 domain-containing protein
GLYMA_12G142900	mRNA	-1.49554	4.58101e-55	4.52543e-56	uncharacterized LOC100527035
GLYMA_02G017100	mRNA	-2.01885	1.86801e-198	6.1223e-200	indole-3-acetic acid-induced protein ARG2-like
GLYMA_15G177400	mRNA	-1.26615	3.34546e-77	2.50852e-78	uncharacterized LOC100808150
GLYMA_15G059600	mRNA	1.21924	1.0774e-07	3.67416e-08	MADS-box transcription factor 23
GLYMA_02G070000	mRNA	-3.6849	1.10724e-18	2.29901e-19	NAC transcription factor 29
GLYMA_08G179600	mRNA	-4.59317	0	0	cationic peroxidase 2-like
GLYMA_13G336700	mRNA	1.00766	1.85813e-10	5.38565e-11	RHOMBOID-like protein 1
GLYMA_16G205100	mRNA	2.41464	6.29108e-09	1.9881e-09	LRR receptor-like serine/threonine-protein kinase GSO2
GLYMA_20G033900	mRNA	3.15757	6.33716e-111	3.5025e-112	uncharacterized LOC100527059
GLYMA_19G159100	mRNA	-1.11912	4.62385e-08	1.537e-08	serine/threonine-protein kinase Nek4
GLYMA_06G305300	mRNA	1.95207	4.41873e-20	8.75071e-21	uncharacterized GPI-anchored protein At1g61900
GLYMA_20G233100	mRNA	1.69361	4.45113e-16	1.01305e-16	uncharacterized LOC100527063
GLYMA_14G220600	mRNA	8.03837	1.76205e-111	9.67627e-113	GDSL esterase/lipase EXL3
GLYMA_02G195000	mRNA	-1.31522	2.56996e-06	9.7287e-07	nuclear transcription factor Y subunit A-1
GLYMA_14G215600	mRNA	-2.68191	1.89388e-11	5.21145e-12	protein RSI-1
GLYMA_13G341500	mRNA	1.72933	0	0	DNA-damage-repair/toleration protein DRT100-like
GLYMA_17G035400	mRNA	-4.06731	3.18698e-109	1.78401e-110	WRKY transcription factor 23
GLYMA_17G031800	mRNA	-2.30406	1.23199e-187	4.25949e-189	acetate/butyrate--CoA ligase AAE7, peroxisomal
GLYMA_01G226200	mRNA	3.62539	1.38199e-20	2.6939e-21	phosphatidylinositol 4-kinase gamma 2
GLYMA_13G300400	mRNA	2.50323	5.50136e-09	1.73134e-09	uncharacterized LOC100790961
GLYMA_13G282000	mRNA	1.31228	0	0	chlorophyll a-b binding protein 13, chloroplastic-like
GLYMA_11G025100	mRNA	2.57052	3.698e-12	9.86033e-13	putative leucine-rich repeat-containing protein DDB_G0290503
GLYMA_16G044600	mRNA	-1.14444	5.91873e-92	3.88127e-93	acetyl-coenzyme A synthetase, chloroplastic/glyoxysomal
GLYMA_15G123800	mRNA	1.97816	0	0	aspartyl protease family protein At5g10770
GLYMA_11G056100	mRNA	-1.23003	0	0	uncharacterized LOC100527048
GLYMA_03G183300	mRNA	-2.06524	5.17127e-11	1.4536e-11	heavy metal-associated isoprenylated plant protein 6
GLYMA_01G236500	mRNA	-2.21583	2.32092e-34	3.24518e-35	uncharacterized LOC100527055
GLYMA_09G151700	mRNA	-1.06143	1.28656e-61	1.16536e-62	cysteine-rich receptor-like protein kinase
GLYMA_08G273100	mRNA	4.87407	0.00017139	7.70167e-05	phosphoenolpyruvate carboxykinase (ATP)
GLYMA_01G206700.1	mRNA	-1.77931	3.01223e-51	3.13419e-52	ethylene-responsive transcription factor 5-like
GLYMA_18G247800	mRNA	2.12405	1.72926e-19	3.49389e-20	cyclin-U4-1
GLYMA_11G008900	mRNA	-1.12811	4.06076e-23	7.3387e-24	uncharacterized LOC100792668
GLYMA_11G207300	mRNA	-1.2947	9.37324e-43	1.11917e-43	cysteine-rich receptor-like protein kinase
GLYMA_14G069900	mRNA	-1.23927	1.93259e-07	6.71334e-08	uncharacterized LOC102665063
GLYMA_13G090700	mRNA	-1.24796	2.92333e-22	5.42021e-23	glycine-rich cell wall structural protein 2
GLYMA_11G062600	mRNA	-3.20275	0.000262647	0.000120438	cytochrome P450 71D8
GLYMA_18G241100	mRNA	-1.14205	5.23799e-10	1.55333e-10	uncharacterized LOC100798633
GLYMA_02G013300	mRNA	1.51261	1.16868e-08	3.75444e-09	probable beta-D-xylosidase 2
GLYMA_02G292400	mRNA	1.61704	9.57948e-87	6.58744e-88	uncharacterized LOC100798628
GLYMA_01G211500	mRNA	-1.55269	1.36894e-15	3.17013e-16	protein ODORANT1
GLYMA_04G255600	mRNA	5.55214	1.11016e-06	4.08377e-07	GDSL esterase/lipase At1g33811
GLYMA_16G165800	mRNA	1.28449	0	0	photosystem II type I chlorophyll a/b-binding protein
GLYMA_10G006700	mRNA	-4.77429	1.09929e-25	1.86496e-26	inorganic phosphate transporter 1-3
GLYMA_20G226300	mRNA	-1.44896	2.1957e-286	5.11881e-288	phosphoribosylaminoimidazole carboxylase, chloroplastic
GLYMA_20G211100	mRNA	1.1985	2.1652e-06	8.1454e-07	uncharacterized LOC100812376
GLYMA_11G059900	mRNA	2.70414	0.000477166	0.00022526	cell division cycle-associated 7-like protein
GLYMA_03G128000	mRNA	1.41196	0.000349214	0.000162262	uncharacterized LOC100780601
GLYMA_03G136100	mRNA	-1.15312	8.22549e-06	3.24534e-06	AP2-like ethylene-responsive transcription factor At2g41710
GLYMA_18G263200	mRNA	-1.32944	2.41674e-05	9.95953e-06	ABC transporter C family member 3
GLYMA_11G021300	mRNA	-1.69579	0.00026706	0.000122567	meiotic recombination protein SPO11-2
GLYMA_10G023300	mRNA	1.28408	2.67919e-32	3.91707e-33	receptor-like cytosolic serine/threonine-protein kinase RBK2
GLYMA_12G218900	mRNA	-2.80221	7.05956e-13	1.82499e-13	dynein light chain 2, cytoplasmic
GLYMA_18G287000	mRNA	-1.05519	4.63527e-09	1.45144e-09	disease resistance protein RPP13
GLYMA_10G292800	mRNA	1.1622	3.72274e-05	1.56411e-05	golgin subfamily B member 1
GLYMA_04G159300	mRNA	4.58189	5.93298e-12	1.59426e-12	truncated transcription factor CAULIFLOWER A
GLYMA_08G232100	mRNA	-1.62427	2.54482e-142	1.1227e-143	potassium channel KAT1
GLYMA_09G191800	mRNA	5.16358	2.37527e-26	3.96202e-27	probable protein ABIL5-like
GLYMA_10G000400	mRNA	2.16788	2.79459e-36	3.75432e-37	sieve element occlusion by forisomes 3
GLYMA_02G235200	mRNA	-1.26588	5.56405e-11	1.56704e-11	uncharacterized LOC100814100
GLYMA_09G024900	mRNA	1.74137	7.90897e-27	1.30425e-27	probable LRR receptor-like serine/threonine-protein kinase At4g20940
GLYMA_19G201000	mRNA	-1.9816	6.05094e-53	6.16066e-54	uncharacterized LOC100815920
GLYMA_09G135700	mRNA	-1.61778	1.97979e-114	1.06452e-115	short-chain dehydrogenase TIC 32, chloroplastic
GLYMA_04G189700	mRNA	1.19459	8.89961e-06	3.52223e-06	cytochrome P450 71A1
GLYMA_20G139600	mRNA	-2.63372	1.7737e-14	4.27671e-15	cysteine-rich receptor-like protein kinase
GLYMA_16G157400	mRNA	-1.00212	5.52212e-22	1.03155e-22	lectin protein kinase family protein
GLYMA_17G224300	mRNA	-1.51723	1.693e-95	1.07004e-96	lectin-like receptor kinase
GLYMA_13G087300	mRNA	1.26047	6.20101e-46	7.01343e-47	FCS-like zinc-finger domain-containing protein
GLYMA_19G160100	mRNA	-2.1483	3.98676e-07	1.41893e-07	calmodulin
GLYMA_06G206600	mRNA	-1.44429	1.8443e-144	8.01085e-146	O-fucosyltransferase 34
GLYMA_08G069300	mRNA	2.16963	0	0	uncharacterized LOC113002373
GLYMA_08G311500	mRNA	-2.35475	1.23851e-05	4.96501e-06	spermidine hydroxycinnamoyl transferase
GLYMA_14G206800	mRNA	-1.3873	5.23499e-25	9.0126e-26	KH domain-containing protein At2g38610
GLYMA_06G296100	mRNA	-1.56887	1.67327e-29	2.59237e-30	uncharacterized LOC100812400
GLYMA_19G184100	mRNA	-2.68788	8.12438e-74	6.3533e-75	heavy metal-associated isoprenylated plant protein 6
GLYMA_19G254300	mRNA	-1.46892	0.000304346	0.000140456	protein trichome birefringence-like 25
GLYMA_04G005100	mRNA	2.44618	3.94347e-143	1.72685e-144	uncharacterized LOC100780626
GLYMA_11G229100	mRNA	-1.97297	1.70286e-113	9.22119e-115	uncharacterized LOC100795655
GLYMA_06G188900	mRNA	-1.61515	6.41448e-87	4.40225e-88	HIPL1 protein
GLYMA_18G038000	mRNA	1.28911	9.10884e-06	3.60852e-06	expansin-A6
GLYMA_12G052100	mRNA	-1.55638	0.000158185	7.08588e-05	calmodulin-like protein 3
GLYMA_03G171500	mRNA	-4.18441	1.11236e-85	7.72207e-87	cation/H(+) antiporter 20
GLYMA_20G238000	mRNA	-4.343	0	0	phospholipase D p1-like
GLYMA_01G174700	mRNA	-1.27051	1.97659e-18	4.14235e-19	uncharacterized LOC100800366
GLYMA_18G287700	mRNA	-1.22854	3.97859e-160	1.58384e-161	heat shock cognate 70 kDa protein 2
GLYMA_13G175600	mRNA	-1.15715	2.88915e-06	1.09811e-06	protein DEHYDRATION-INDUCED 19-like
GLYMA_13G146200	mRNA	1.13245	2.32476e-256	5.96482e-258	triosephosphate isomerase, chloroplastic
GLYMA_13G215000	mRNA	-1.66287	1.47508e-91	9.7293e-93	inactive beta-amylase 9
GLYMA_10G041200	mRNA	-2.17966	9.42665e-05	4.12395e-05	uncharacterized LOC100795642
GLYMA_13G144500	mRNA	1.4097	8.90129e-08	3.01734e-08	putative white-brown complex homolog protein 30
GLYMA_03G191700	mRNA	1.82968	9.16724e-05	4.00222e-05	trihelix transcription factor PTL
GLYMA_06G112900	mRNA	2.75568	1.44562e-12	3.79153e-13	long chain acyl-CoA synthetase 9, chloroplastic
GLYMA_03G221100	mRNA	-5.51726	5.1653e-277	1.23517e-278	probable glycerol-3-phosphate acyltransferase 2
GLYMA_05G101700	mRNA	-1.04605	6.86082e-32	1.01205e-32	metal transporter Nramp2a
GLYMA_17G259700	mRNA	4.61104	6.12683e-51	6.40332e-52	GDSL esterase/lipase EXL3
GLYMA_16G006400	mRNA	-1.29586	2.12113e-61	1.92825e-62	disease resistance-like protein DSC1
GLYMA_06G319700	mRNA	-2.12335	1.52272e-81	1.09362e-82	disease resistance protein/LRR protein-related protein
GLYMA_08G192700	mRNA	-1.58536	0.000181761	8.19674e-05	chaperonin CPN60-like 2, mitochondrial
GLYMA_16G153600	mRNA	1.12622	2.92926e-14	7.13085e-15	arabinogalactan protein 14
GLYMA_18G195200	mRNA	-1.03973	4.41445e-184	1.55153e-185	disease resistance protein
GLYMA_15G161500	mRNA	-2.47307	6.29815e-88	4.28463e-89	protein kinase
GLYMA_11G207000	mRNA	-2.04882	0	0	cysteine-rich receptor-like protein kinase
GLYMA_14G025100	mRNA	-1.30271	3.82299e-25	6.56084e-26	uncharacterized LOC100796964
GLYMA_04G005200	mRNA	3.42661	2.86642e-11	7.9486e-12	probable magnesium transporter NIPA6
GLYMA_12G192000	mRNA	-1.3346	3.25273e-66	2.79021e-67	cellulose synthase-like protein H1
GLYMA_07G202200	mRNA	1.10548	1.28206e-16	2.86091e-17	auxin response factor 3
GLYMA_17G016800	mRNA	2.97677	2.50465e-99	1.52977e-100	heavy metal-associated isoprenylated plant protein 33
GLYMA_17G245700	mRNA	-1.00652	1.27586e-31	1.89109e-32	nucleobase-ascorbate transporter 3
GLYMA_05G106700	mRNA	-1.08896	9.90185e-07	3.63108e-07	uncharacterized LOC100780653
GLYMA_05G008400	mRNA	-1.84018	4.53923e-05	1.92362e-05	zinc finger CCCH domain-containing protein 39
GLYMA_15G031400	mRNA	-1.36609	0	0	beta-glucosidase 12
GLYMA_08G030100	mRNA	-2.92035	3.6603e-07	1.29889e-07	1-aminocyclopropane-1-carboxylate synthase 7
GLYMA_12G156900	mRNA	-1.85657	5.09535e-18	1.08326e-18	protein GRAVITROPIC IN THE LIGHT 1
GLYMA_05G233200	mRNA	-1.8812	8.49731e-05	3.69734e-05	cytochrome P450 CYP736A12-like
GLYMA_04G040400	mRNA	-5.84018	9.06176e-08	3.07519e-08	uncharacterized acetyltransferase At3g50280
GLYMA_12G114100	mRNA	-4.63587	0	0	probable L-type lectin-domain containing receptor kinase VII.2
GLYMA_15G084200	mRNA	-1.21642	2.95069e-09	9.12763e-10	calmodulin-binding receptor kinase CaMRLK
GLYMA_01G035300	mRNA	1.98572	4.22802e-25	7.2617e-26	uncharacterized LOC100777177
GLYMA_18G038500	mRNA	-1.35235	1.97462e-55	1.94043e-56	protein kinase
GLYMA_06G073700	mRNA	-2.11544	2.91118e-127	1.42404e-128	uncharacterized LOC100796955
GLYMA_04G236900	mRNA	-1.95374	0	0	glutamate synthase [NADH], amyloplastic
GLYMA_12G014400	mRNA	-1.38429	5.32302e-15	1.25706e-15	protein CDI
GLYMA_09G157900	mRNA	-1.63722	3.49383e-08	1.15289e-08	chloride channel protein CLC-c
GLYMA_19G033500	mRNA	-2.1621	2.83349e-09	8.75272e-10	protein COBRA
GLYMA_14G201800	mRNA	-3.52255	0	0	peroxidase 4
GLYMA_12G130500	mRNA	-4.71464	1.00281e-18	2.07945e-19	senescence-specific cysteine protease SAG39
GLYMA_20G207600	mRNA	-3.84018	7.22174e-07	2.61883e-07	putative protein phosphatase 2C-like protein 44
GLYMA_12G114000	mRNA	-2.77165	0	0	probable serine/threonine-protein kinase At1g54610
GLYMA_12G099700	mRNA	2.57599	3.34351e-18	7.0608e-19	septum-promoting GTP-binding protein 1
GLYMA_09G245400	mRNA	3.1371	7.07163e-32	1.04373e-32	cyclin-U4-1
GLYMA_13G056500	mRNA	4.49074	3.73815e-06	1.43339e-06	uncharacterized LOC100305464
GLYMA_08G146100	mRNA	-2.02114	2.87257e-14	6.99209e-15	WAT1-related protein At5g64700
GLYMA_08G165700	mRNA	-1.09624	3.0476e-16	6.90041e-17	nuclear factor Y transcription factor family protein
GLYMA_01G159400	mRNA	-1.01748	1.97932e-44	2.29262e-45	phosphoinositide phosphatase SAC7
GLYMA_18G254100	mRNA	-4.2089	4.34406e-103	2.54543e-104	AAA-ATPase ASD, mitochondrial
GLYMA_07G029600	mRNA	1.84165	3.4356e-06	1.31307e-06	PTI1-like tyrosine-protein kinase At3g15890
GLYMA_18G083900	mRNA	-1.58011	5.37929e-142	2.38053e-143	disease resistance protein
GLYMA_13G344500	mRNA	-1.65195	1.03626e-191	3.50081e-193	probable fructokinase-4
GLYMA_01G010500	mRNA	-3.65057	0	0	NBS-LRR type disease resistance protein
GLYMA_13G305400	mRNA	4.55214	0.000977298	0.000479362	leucine-rich repeat extensin-like protein 3
GLYMA_15G276300	mRNA	1.41158	1.62781e-90	1.08033e-91	cycloartenol-C-24-methyltransferase-like
GLYMA_10G111200	mRNA	5.77453	1.27814e-07	4.37843e-08	protein trichome birefringence-like 36
GLYMA_07G106800	mRNA	-1.53205	8.1184e-12	2.19523e-12	transcription repressor KAN1
GLYMA_15G276000	mRNA	1.97689	3.03095e-16	6.86106e-17	DNA topoisomerase 2
GLYMA_20G018800	mRNA	-1.00408	5.26635e-98	3.25386e-99	cytochrome P450 89A2
GLYMA_20G125500	mRNA	-4.32211	1.3328e-164	5.15312e-166	uncharacterized LOC100795681
GLYMA_01G191900	mRNA	-2.95779	1.72326e-140	7.71063e-142	acyl-CoA-binding domain-containing protein 3
GLYMA_06G109900	mRNA	1.24729	1.56513e-05	6.33008e-06	uncharacterized LOC100814186
GLYMA_16G061800	mRNA	-1.30412	4.21938e-05	1.78198e-05	glutamate receptor 2.5
GLYMA_14G115900	mRNA	1.30864	7.02681e-11	1.98973e-11	uncharacterized LOC112999358
GLYMA_11G235700	mRNA	5.21511	7.3655e-10	2.20282e-10	putative protein TPRXL
GLYMA_04G166600	mRNA	-1.01633	0.000197124	8.91558e-05	galactoside 2-alpha-L-fucosyltransferase
GLYMA_11G182100	mRNA	1.59435	4.50332e-197	1.48944e-198	uncharacterized LOC100306681
GLYMA_12G159000	mRNA	1.1413	3.73152e-123	1.87415e-124	O-fucosyltransferase 35
GLYMA_05G050600	mRNA	2.51738	1.03592e-06	3.80245e-07	homeobox protein HD1
GLYMA_15G256000	mRNA	-3.93971	1.6054e-10	4.63474e-11	cysteine-rich and transmembrane domain-containing protein WIH1
GLYMA_08G074200	mRNA	-1.16609	6.97646e-11	1.9749e-11	J domain-containing protein
GLYMA_05G108600	mRNA	2.2402	0.000149277	6.66505e-05	AP2-like ethylene-responsive transcription factor ANT
GLYMA_14G042700	mRNA	-2.93087	6.6253e-24	1.17314e-24	receptor-like protein 7
GLYMA_20G052900	mRNA	3.2024	8.51998e-21	1.65056e-21	sieve element occlusion p
GLYMA_20G082500	mRNA	-1.73509	0	0	ammonium transporter AMT1.1
GLYMA_09G131100	mRNA	-1.48577	2.43196e-74	1.8892e-75	uncharacterized LOC100306678
GLYMA_13G100100	mRNA	1.57372	1.17322e-70	9.5009e-72	subtilisin-like protease SBT2.5
GLYMA_12G002000	mRNA	1.46968	6.11882e-08	2.05212e-08	uncharacterized LOC100800276
GLYMA_17G011400	mRNA	-1.991	2.24618e-15	5.23832e-16	WRKY transcription factor 6
GLYMA_12G158900	mRNA	1.15115	2.02671e-94	1.29588e-95	transcription factor TCP3
GLYMA_15G202100	mRNA	-1.16058	0.000677432	0.000325906	uncharacterized LOC100815807
GLYMA_15G080500	mRNA	1.82223	2.58337e-12	6.84602e-13	GDSL esterase/lipase At5g45920
GLYMA_10G176500	mRNA	-4.09171	8.28396e-12	2.24045e-12	isoflavone-7-O-methyltransferase 9
GLYMA_15G099500	mRNA	-3.42514	4.79641e-09	1.50268e-09	sugar transporter ERD6-like 16
GLYMA_07G096700	mRNA	4.06872	1.46886e-22	2.69821e-23	non-specific lipid-transfer protein 2-like
GLYMA_08G138300	mRNA	-1.75367	5.60476e-09	1.76464e-09	probable glucan 1,3-beta-glucosidase A
GLYMA_03G205900	mRNA	-1.87037	1.53205e-138	6.93445e-140	probable glutamate carboxypeptidase AMP1
GLYMA_12G239600	mRNA	2.99693	4.03245e-05	1.70006e-05	FT-interacting protein 1
GLYMA_14G067500	mRNA	-1.93971	1.14622e-05	4.58114e-06	uncharacterized LOC100803152
GLYMA_12G218800	mRNA	-4.93971	5.22557e-22	9.7544e-23	uncharacterized LOC100800264
GLYMA_14G014300	mRNA	-1.00017	2.74113e-22	5.08091e-23	mitochondrial import inner membrane translocase subunit TIM50
GLYMA_01G173600	mRNA	1.45261	1.61625e-19	3.25938e-20	laccase-11
GLYMA_11G124900	mRNA	1.6659	4.49072e-236	1.2465e-237	peptidyl-prolyl cis-trans isomerase FKBP16-3, chloroplastic
GLYMA_16G117700	mRNA	-1.25833	4.88922e-22	9.11987e-23	probable serine/threonine-protein kinase PIX13
GLYMA_11G179600	mRNA	3.09123	0	0	serine/threonine-protein kinase Nek5
GLYMA_12G109700	mRNA	3.25258	5.26692e-08	1.75851e-08	ELMO domain-containing protein A
GLYMA_15G024300	mRNA	3.28429	2.57361e-54	2.57396e-55	receptor-like serine/threonine-protein kinase ALE2
GLYMA_06G179200	mRNA	-3.73326	3.23425e-14	7.89007e-15	galactinol--sucrose galactosyltransferase
GLYMA_01G067100	mRNA	-1.09871	7.32239e-11	2.07523e-11	UDP-glycosyltransferase 89A2
GLYMA_10G249600	mRNA	3.77453	0.000715995	0.000345366	mavicyanin
GLYMA_13G269100	mRNA	1.54576	1.35476e-33	1.91754e-34	pathogen-related protein
GLYMA_06G122200	mRNA	2.18957	5.70569e-06	2.22176e-06	sugar efflux transporter SWEET13
GLYMA_02G146900	mRNA	-1.01272	0	0	protein TIME FOR COFFEE
GLYMA_16G065900	mRNA	-1.16368	4.00426e-233	1.12458e-234	cystinosin homolog
GLYMA_18G294400	mRNA	-4.12028	9.41548e-05	4.11804e-05	LEAF RUST 10 DISEASE-RESISTANCE LOCUS RECEPTOR-LIKE PROTEIN KINASE-like 2.1
GLYMA_07G134600	mRNA	1.10045	6.52446e-07	2.35806e-07	E3 ubiquitin-protein ligase RDUF1
GLYMA_18G018200	mRNA	1.17363	3.30559e-08	1.08934e-08	ethylene-responsive transcription factor ERF060
GLYMA_13G119000	mRNA	-3.11082	2.59542e-14	6.30684e-15	ABC transporter B family member 11
GLYMA_18G204300	pseudo	-1.42793	0.000171083	7.68578e-05	receptor-like protein 20
GLYMA_02G108700	mRNA	-1.85879	7.79142e-05	3.37766e-05	calmodulin-like protein 7
GLYMA_02G182600	mRNA	-3.04529	6.88842e-100	4.18283e-101	remorin 4.1
GLYMA_08G330700	mRNA	-3.05667	2.28425e-84	1.60194e-85	cellulose synthase-like protein E1
GLYMA_08G022600	mRNA	-1.03282	1.96483e-05	8.0195e-06	uncharacterized LOC113002366
GLYMA_11G206100	mRNA	-1.28004	1.18997e-113	6.4341e-115	cysteine-rich receptor-like protein kinase
GLYMA_07G095800	mRNA	-2.55123	1.52281e-145	6.5729e-147	PR5-like receptor kinase
GLYMA_17G173000	mRNA	-2.03282	0.000150738	6.7336e-05	mitogen-activated protein kinase kinase kinase 2-like
GLYMA_11G129500	mRNA	-6.40786	1.30556e-20	2.54349e-21	cyanogenic beta-glucosidase
GLYMA_10G045500	mRNA	2.77453	1.49788e-08	4.84365e-09	kinesin-like protein KIN-5B
GLYMA_19G222000	mRNA	1.42461	1.26103e-35	1.71301e-36	bHLH transcription factor PIF3
GLYMA_01G159800	mRNA	-1.0218	1.39262e-71	1.11372e-72	phosphoserine aminotransferase 1, chloroplastic
GLYMA_14G054100	mRNA	-1.52248	6.70416e-16	1.53661e-16	amino acid transporter AVT6C
GLYMA_01G123400	mRNA	-1.04663	2.50684e-05	1.03486e-05	ammonium transporter AMT2.3
GLYMA_01G099800	mRNA	-2.1621	3.48086e-05	1.4575e-05	delta-1-pyrroline-5-carboxylate synthase
GLYMA_07G072500	mRNA	-1.31058	8.17768e-102	4.88542e-103	FT-interacting protein 1
GLYMA_20G180800	mRNA	1.34137	1.13397e-16	2.52519e-17	phenylalanine ammonia-lyase 2.2
GLYMA_09G055700	mRNA	-1.57972	2.3828e-15	5.5602e-16	rust resistance kinase Lr10-like
GLYMA_09G229200	mRNA	-3.08764	1.00922e-102	5.93284e-104	purple acid phosphatase
GLYMA_14G205000	mRNA	1.03188	8.16779e-68	6.88166e-69	putative disease resistance protein At5g05400
GLYMA_03G050500	mRNA	2.65025	1.80392e-09	5.51332e-10	gamma-interferon-inducible lysosomal thiol reductase-like
GLYMA_14G003800	mRNA	-2.19938	1.95932e-77	1.46595e-78	cilia- and flagella-associated protein 251
GLYMA_17G110300	mRNA	-1.17032	0.000974338	0.000477512	xylogalacturonan beta-1,3-xylosyltransferase
GLYMA_08G201300	mRNA	-1.01368	0	0	ABC transporter G family member 36
GLYMA_03G197300	mRNA	1.23021	0.000375417	0.000175036	kinesin-like protein KIN-5C
GLYMA_09G159000	mRNA	-1.66653	1.53186e-50	1.60997e-51	uncharacterized LOC100815851
GLYMA_14G075100	mRNA	-1.58446	1.78693e-17	3.87399e-18	uncharacterized LOC112999396
GLYMA_01G044600	mRNA	1.08879	6.52118e-39	8.31617e-40	homeobox-leucine zipper protein ATHB-13-like
GLYMA_09G274700	mRNA	-1.04818	9.97769e-28	1.60949e-28	uncharacterized LOC100814077
GLYMA_04G201600	mRNA	4.66762	6.60996e-07	2.39022e-07	uncharacterized LOC102663110
GLYMA_05G209400	mRNA	-2.94428	4.02274e-53	4.08142e-54	ubiquitin-conjugating enzyme E2 5-like
GLYMA_08G004600	mRNA	1.84165	0.000383085	0.000178736	phosphatidylinositol 4-phosphate 5-kinase 1
GLYMA_08G049200	mRNA	1.13507	9.22483e-208	2.90768e-209	IRK-interacting protein
GLYMA_13G094200	mRNA	3.43666	2.44763e-54	2.4473e-55	SCP-like extracellular protein domain-containing protein
GLYMA_08G316700	mRNA	-1.20824	4.82924e-51	5.04058e-52	protein translation factor SUI1 homolog 2
GLYMA_03G210400	mRNA	-2.51981	1.29215e-78	9.56561e-80	monothiol glutaredoxin-S6
GLYMA_10G139500	mRNA	1.0575	0	0	peptidyl-prolyl cis-trans isomerase CYP28
GLYMA_08G029600	mRNA	-1.19964	6.19915e-36	8.37541e-37	thiamine phosphate phosphatase-like protein
GLYMA_06G291700	mRNA	2.40775	6.62939e-16	1.51893e-16	O-acyltransferase WSD1
GLYMA_16G097200	mRNA	-8.2467	3.87485e-62	3.48763e-63	beta-glucosidase 11
GLYMA_18G294200	mRNA	-1.35142	9.8729e-171	3.68534e-172	non-specific lipid-transfer protein 2
GLYMA_19G198600	mRNA	-3.32431	5.19915e-165	2.00453e-166	NDR1/HIN1-like protein 10
GLYMA_13G188300	mRNA	-1.20675	2.33799e-19	4.7493e-20	putative disease resistance RPP13-like protein 1
GLYMA_13G172500	mRNA	-1.02591	2.07742e-25	3.54535e-26	GDSL esterase/lipase At5g45960
GLYMA_06G136900	mRNA	-1.13414	8.14244e-33	1.17224e-33	protein TRANSPARENT TESTA GLABRA 1
GLYMA_08G169000	mRNA	-1.68191	7.34338e-07	2.66494e-07	LBD domain-containing transcription factor
GLYMA_16G133800	mRNA	-2.35475	2.12368e-13	5.3551e-14	abscisic acid 8'-hydroxylase 3
GLYMA_08G136800	mRNA	-1.03512	6.32162e-26	1.06576e-26	uncharacterized LOC100787672
GLYMA_19G152500	mRNA	-1.71089	4.87853e-12	1.30693e-12	uncharacterized LOC100820515
GLYMA_16G170800	mRNA	-3.2272	1.8442e-22	3.39876e-23	receptor-like protein EIX2
GLYMA_11G097500	mRNA	-1.45993	9.42928e-153	3.89255e-154	uncharacterized LOC100820516
GLYMA_16G220900	mRNA	-3.62976	1.04136e-72	8.23719e-74	acid phosphatase 1
GLYMA_12G206700	mRNA	-2.28739	4.75229e-35	6.53594e-36	uncharacterized LOC100791118
GLYMA_15G156100	mRNA	-4.03282	0.000171466	7.70699e-05	isoflavone 2'-hydroxylase-like
GLYMA_08G178800	mRNA	-1.12544	7.37886e-63	6.5952e-64	probable protein phosphatase 2C 9
GLYMA_04G016700	mRNA	-2.82579	6.2803e-80	4.58586e-81	WUSCHEL-related homeobox 8
GLYMA_06G085300	mRNA	-1.68962	1.98609e-30	3.01095e-31	probable glycosyltransferase At5g03795
GLYMA_16G101200	mRNA	-1.03162	1.31154e-87	8.95819e-89	uncharacterized LOC100526945
GLYMA_13G112500	mRNA	1.77676	0	0	20 kDa chaperonin, chloroplastic
GLYMA_19G145700	mRNA	1.78991	3.12615e-26	5.22773e-27	probable pectinesterase 8
GLYMA_15G142000	mRNA	-1.49113	4.83011e-180	1.71869e-181	uncharacterized LOC112999526
GLYMA_07G256300	mRNA	2.66762	1.40971e-10	4.05597e-11	uncharacterized protein
GLYMA_13G141400	mRNA	-1.22292	1.76268e-09	5.38297e-10	pentatricopeptide repeat-containing protein At2g22410, mitochondrial
GLYMA_15G077100	mRNA	-1.89532	7.89244e-17	1.74806e-17	ethylene-responsive transcription factor 4
GLYMA_15G071200	mRNA	-5.80101	5.29809e-27	8.70446e-28	polyphenol oxidase A1, chloroplastic
GLYMA_12G047900	mRNA	-1.43418	2.3469e-10	6.83432e-11	extra-large guanine nucleotide-binding protein 1
GLYMA_08G296700	mRNA	-1.00493	2.37537e-147	1.01492e-148	mitochondrial outer membrane protein porin of 36 kDa
GLYMA_14G065700	mRNA	-1.33811	3.85854e-24	6.76703e-25	uncharacterized LOC100818815
GLYMA_20G154700	mRNA	-2.0836	2.17797e-306	4.73304e-308	uncharacterized LOC100820534
GLYMA_16G204600	mRNA	-4.08142	0	0	enolase
GLYMA_08G127600	mRNA	4.77453	0.000305213	0.000140926	13S globulin seed storage protein 2
GLYMA_08G251200	mRNA	-1.70463	1.65288e-63	1.46562e-64	uncharacterized protein YwbO
GLYMA_16G081200	mRNA	-1.42109	6.61016e-07	2.39011e-07	non-specific phospholipase C4
GLYMA_18G156900	mRNA	-1.25254	1.04551e-19	2.09472e-20	transcription factor bHLH62
GLYMA_09G185300	mRNA	1.94807	1.65125e-23	2.95492e-24	uncharacterized LOC100526971
GLYMA_18G021200	mRNA	3.01781	8.54045e-30	1.31501e-30	uncharacterized LOC100526978
GLYMA_02G157700	mRNA	2.08266	3.54185e-08	1.16903e-08	condensin complex subunit 1
GLYMA_17G065200	mRNA	-4.20351	1.66757e-192	5.59721e-194	xyloglucan endotransglucosylase/hydrolase family protein
GLYMA_13G314400	mRNA	-3.71932	8.2935e-22	1.55694e-22	uncharacterized LOC100306500
GLYMA_01G037200	mRNA	-2.98278	1.84234e-29	2.85732e-30	metalloendoproteinase 5-MMP
GLYMA_15G112600	mRNA	-1.03282	0.000146135	6.51559e-05	uncharacterized LOC100804959
GLYMA_18G099100	mRNA	1.6261	0.000924362	0.000451885	uncharacterized LOC102663078
GLYMA_02G237800	mRNA	-1.50195	4.0815e-175	1.48793e-176	KH domain-containing protein At3g08620
GLYMA_10G235000	mRNA	-3.42514	5.2067e-13	1.33692e-13	uncharacterized LOC100787709
GLYMA_18G201900	mRNA	-4.26455	1.36495e-136	6.2488e-138	probable 2-oxoglutarate-dependent dioxygenase At5g05600
GLYMA_08G148400	mRNA	1.82516	0.000979017	0.000480526	uncharacterized LOC100306484
GLYMA_20G213900	mRNA	-2.03282	0.000150738	6.7336e-05	22.0 kDa class IV heat shock protein
GLYMA_08G099300	mRNA	-1.23927	0.000292617	0.000134843	DEAD-box ATP-dependent RNA helicase 1
GLYMA_07G073800	mRNA	-1.025	4.46879e-152	1.85088e-153	(+)-neomenthol dehydrogenase
GLYMA_07G136200	mRNA	-2.88526	1.2919e-11	3.52484e-12	tropinone reductase homolog At5g06060
GLYMA_08G361400	mRNA	-3.25521	3.03551e-11	8.42826e-12	putative E3 ubiquitin-protein ligase LIN-2
GLYMA_17G066800	mRNA	-3.55638	1.39853e-05	5.63473e-06	PTI1-like tyrosine-protein kinase At3g15890
GLYMA_13G225700	mRNA	-3.1522	2.04802e-109	1.1431e-110	heat stress transcription factor 29
GLYMA_06G100300	mRNA	-1.33262	2.11958e-56	2.05629e-57	uncharacterized LOC100306522
GLYMA_09G055400	mRNA	3.90264	3.76421e-32	5.5229e-33	probable receptor-like serine/threonine-protein kinase At5g57670
GLYMA_18G147000	mRNA	4.96718	9.65741e-05	4.22978e-05	uncharacterized protein At4g38062
GLYMA_18G205500	mRNA	-3.57714	5.94891e-08	1.994e-08	receptor-like protein 7
GLYMA_12G081300	mRNA	1.83113	0	0	superoxide dismutase [Cu-Zn], chloroplastic
GLYMA_08G254600	mRNA	1.78322	3.44138e-23	6.20809e-24	uncharacterized LOC113002402
GLYMA_02G008100	mRNA	1.04118	0.000326091	0.00015102	uncharacterized LOC100803234
GLYMA_01G205500	mRNA	1.47414	9.86925e-05	4.32659e-05	uncharacterized LOC100804977
GLYMA_05G147100	mRNA	-1.714	4.50995e-09	1.41134e-09	cytochrome P450 78A5
GLYMA_19G124600	mRNA	1.79906	4.45617e-09	1.39353e-09	alpha-L-arabinofuranosidase 1
GLYMA_01G210400	mRNA	-1.46892	2.08624e-07	7.26756e-08	L-lactate dehydrogenase B
GLYMA_19G248900	mRNA	-2.34846	1.32542e-30	2.00322e-31	ethylene-responsive transcription factor 1B
GLYMA_06G229900	mRNA	-1.56909	0	0	phosphoenolpyruvate carboxylase, housekeeping isozyme-like
GLYMA_17G069600	mRNA	-1.44182	0	0	UDP-glucuronate 4-epimerase 1
GLYMA_18G206400	mRNA	1.89847	1.19764e-32	1.73303e-33	receptor protein kinase-like protein ZAR1
GLYMA_18G191600	mRNA	-1.98069	2.99718e-210	9.34906e-212	uncharacterized LOC100526983
GLYMA_10G002200	mRNA	-2.62065	2.68176e-221	7.90453e-223	calmodulin-like protein
GLYMA_18G121600	mRNA	1.35545	2.2122e-06	8.32944e-07	HVA22-like protein
GLYMA_01G104100	mRNA	2.36016	1.31353e-206	4.16532e-208	isochorismate synthase, chloroplastic
GLYMA_08G352100	mRNA	-2.84018	2.34105e-13	5.91215e-14	G-type lectin S-receptor-like serine/threonine-protein kinase At1g11300
GLYMA_18G026900	mRNA	-2.58955	1.52111e-37	1.99041e-38	putative serine/threonine-protein kinase-like protein CCR3
GLYMA_14G080800	mRNA	-2.38704	4.25973e-284	9.97713e-286	uncharacterized LOC100820584
GLYMA_17G027800	mRNA	-2.3887	2.31298e-29	3.5923e-30	uncharacterized LOC100818870
GLYMA_18G002600	mRNA	1.39039	9.82028e-05	4.30378e-05	probable xyloglucan galactosyltransferase GT14
GLYMA_14G221200	mRNA	-1.06789	4.03298e-39	5.11778e-40	putative cinnamyl alcohol dehydrogenase
GLYMA_14G032900	mRNA	2.15682	3.98619e-164	1.54448e-165	probable polygalacturonase
GLYMA_12G173700	mRNA	-1.03887	1.31445e-10	3.77617e-11	beta-galactosidase 8
GLYMA_08G198700	mRNA	-1.97994	2.02248e-46	2.27312e-47	putative leucine-rich repeat receptor-like protein kinase At2g19210
GLYMA_11G152200	mRNA	-1.55675	2.7314e-37	3.58899e-38	G-type lectin S-receptor-like serine/threonine-protein kinase At4g27290
GLYMA_04G185800	mRNA	1.93731	6.58698e-72	5.25162e-73	uncharacterized LOC100803280
GLYMA_13G123100	mRNA	-3.00683	7.68054e-29	1.20753e-29	ethylene-responsive transcription factor 1-like protein
GLYMA_15G256200	mRNA	-2.66509	1.01566e-05	4.04352e-06	cysteine-rich and transmembrane domain-containing protein WIH1-like
GLYMA_05G143200	mRNA	1.20654	8.13884e-21	1.57584e-21	uncharacterized LOC100820544
GLYMA_11G121900	mRNA	-1.73026	1.61678e-11	4.42822e-12	uncharacterized LOC100527018
GLYMA_09G049700	mRNA	-1.09232	8.329e-78	6.20445e-79	vacuolar-sorting receptor 6
GLYMA_15G267700	mRNA	-1.54739	3.699e-29	5.76813e-30	major facilitator superfamily domain-containing protein 12
GLYMA_04G075800	mRNA	-4.56976	1.82823e-74	1.41672e-75	uncharacterized LOC100787739
GLYMA_19G017000	mRNA	4.55214	0.000977298	0.000479362	uncharacterized LOC100306529
GLYMA_11G025800	mRNA	-1.08867	6.91396e-08	2.32539e-08	uncharacterized LOC100306532
GLYMA_14G082400	mRNA	-1.30724	3.37754e-65	2.93687e-66	EF-hand domain-containing protein
GLYMA_20G200200	mRNA	1.57599	1.24392e-05	4.98823e-06	cysteine-rich repeat secretory protein 3
GLYMA_20G234700	mRNA	-1.11771	0.000315394	0.000145859	uncharacterized LOC100784762
GLYMA_05G085700	mRNA	-1.22387	1.88821e-14	4.55847e-15	protein IRX15-LIKE
GLYMA_20G030600	mRNA	-1.52221	2.24414e-06	8.45277e-07	uncharacterized LOC100784766
GLYMA_05G126800	mRNA	-5.12028	4.31898e-05	1.82557e-05	uncharacterized LOC100784767
GLYMA_08G198000	mRNA	-1.81077	9.70557e-07	3.55487e-07	probable LRR receptor-like serine/threonine-protein kinase At4g29180
GLYMA_08G212400	mRNA	1.6396	4.13562e-05	1.74513e-05	glucan endo-1,3-beta-glucosidase 14-like
GLYMA_03G157800	mRNA	-2.81043	1.14824e-08	3.68626e-09	uncharacterized LOC100527005
GLYMA_08G270500	mRNA	2.51705	1.17919e-09	3.567e-10	uncharacterized LOC100820561
GLYMA_03G140700	mRNA	3.62253	2.92417e-13	7.41987e-14	protein kinase
GLYMA_20G169000	mRNA	-1.23213	2.44923e-59	2.28261e-60	serine/threonine protein kinase-like protein
GLYMA_20G137700	mRNA	-3.94045	0	0	cysteine-rich receptor-like protein kinase
GLYMA_13G033000	mRNA	-2.48289	0	0	stress-induced receptor-like kinase
GLYMA_03G134900	mRNA	3.18957	5.68507e-06	2.21342e-06	kinesin-like protein KIN-14L
GLYMA_19G085600	mRNA	-1.03464	6.17942e-09	1.95113e-09	NBS-LRR disease resistance protein
GLYMA_17G222600	mRNA	2.12577	1.0722e-26	1.77341e-27	formin-like protein 18
GLYMA_09G282500	mRNA	1.95857	1.39018e-34	1.93052e-35	myosin-7
GLYMA_01G040900	mRNA	-1.23927	0.000292617	0.000134843	pre-mRNA-splicing factor ATP-dependent RNA helicase DEAH1
GLYMA_18G222200	mRNA	2.66601	2.81624e-131	1.34381e-132	fasciclin-like arabinogalactan protein 10
GLYMA_16G033600	mRNA	-3.1733	2.57978e-275	6.21819e-277	transferase family protein
GLYMA_02G051600	mRNA	1.94397	8.03719e-38	1.04423e-38	3-epi-6-deoxocathasterone 23-monooxygenase
GLYMA_17G214100	mRNA	-3.6953	5.36668e-09	1.68734e-09	stress-induced receptor-like kinase
GLYMA_01G121000	mRNA	-4.09891	1.86426e-15	4.33546e-16	trihelix transcription factor GT-3b
GLYMA_19G022000	mRNA	-2.67781	9.5712e-49	1.0358e-49	uncharacterized LOC100778657
GLYMA_14G043000	mRNA	-3.82672	8.42637e-07	3.07163e-07	PK-LRR-TM resistance protein
GLYMA_02G296600	mRNA	-1.99029	0	0	zinc finger CCCH domain-containing protein 29
GLYMA_16G174600	mRNA	-4.61205	8.29803e-07	3.02417e-07	receptor-like protein EIX1
GLYMA_05G136900	mRNA	1.70414	0.000204072	9.24178e-05	brassinosteroid receptor-like protein
GLYMA_01G019200	mRNA	-2.27048	1.50327e-165	5.77123e-167	phosphoenolpyruvate carboxykinase (ATP)
GLYMA_04G075700	mRNA	-1.41133	2.50106e-10	7.29484e-11	F-box protein AFR
GLYMA_09G069900	mRNA	-1.26023	2.62737e-06	9.95178e-07	serine/threonine-protein kinase RIPK
GLYMA_01G023000	mRNA	1.30317	1.40609e-67	1.18929e-68	uncharacterized LOC100791019
GLYMA_16G126100	mRNA	-3.43294	3.49514e-09	1.08557e-09	receptor-like protein EIX2
GLYMA_02G234200	mRNA	-2.28034	0	0	peroxidase 4
GLYMA_11G181200	mRNA	-2.73808	8.92371e-116	4.75688e-117	probable F-box protein At2g36090
GLYMA_09G181600	mRNA	-1.03133	2.12916e-47	2.35122e-48	serine/threonine protein kinase family protein
GLYMA_13G054300	mRNA	-1.12102	5.79372e-165	2.23534e-166	FERONIA receptor-like kinase
GLYMA_01G203500	mRNA	-4.02717	4.62239e-55	4.56883e-56	NAK-type protein kinase
GLYMA_10G253700	mRNA	-3.49225	2.52007e-05	1.04077e-05	putative receptor-like protein kinase At4g00960
GLYMA_15G045600	mRNA	-2.19536	1.61677e-93	1.04302e-94	probable receptor-like protein kinase At1g11050
GLYMA_01G165200	mRNA	3.77453	0.000715995	0.000345366	MLO-like protein 4
GLYMA_20G014400	mRNA	-1.55716	1.76756e-18	3.69369e-19	homeobox-leucine zipper protein HOX3
GLYMA_08G060500	mRNA	-1.27002	7.6047e-37	1.0094e-37	protein kinase
GLYMA_17G151500	mRNA	2.93065	2.28106e-07	7.96955e-08	putative invertase inhibitor
GLYMA_09G149200	mRNA	2.06843	1.42402e-91	9.3886e-93	gibberellin 20-oxidase 1
GLYMA_09G176300	mRNA	2.69836	1.48619e-25	2.52663e-26	auxin efflux carrier component 1c
GLYMA_17G030300	mRNA	-8.05419	2.3622e-28	3.75633e-29	stress-induced protein SAM22-like
GLYMA_16G200800	pseudo	2.55214	0.000199276	9.01836e-05	gibberellin 20-oxidase 2
GLYMA_17G232900	mRNA	-3.90072	2.10737e-31	3.13736e-32	uncharacterized LOC100791035
GLYMA_14G111400	mRNA	-1.38428	2.90451e-189	9.94702e-191	uncharacterized LOC100806546
GLYMA_03G254600	mRNA	-2.15835	1.99922e-23	3.58633e-24	uncharacterized protein At5g41620
GLYMA_10G047400	mRNA	3.15481	3.26644e-15	7.65688e-16	uncharacterized LOC100812501
GLYMA_05G175400	mRNA	-2.00842	1.62793e-131	7.75017e-133	RING-H2 finger protein ATL52-like
GLYMA_15G242800	mRNA	-2.03282	3.49707e-13	8.90501e-14	protein kinase family protein
GLYMA_13G250400	mRNA	4.35261	7.37775e-272	1.79239e-273	nerol synthase
GLYMA_06G171100	mRNA	-4.07721	3.71114e-08	1.22612e-08	calcium-binding protein CML38-like
GLYMA_11G137300	mRNA	-1.30006	8.90115e-52	9.2106e-53	E3 ubiquitin-protein ligase RDUF2
GLYMA_06G142300	mRNA	1.87972	3.42874e-07	1.21354e-07	two-component response regulator ARR17-like
GLYMA_11G248300	mRNA	-1.72616	3.74757e-119	1.93944e-120	uncharacterized membrane protein YuiD
GLYMA_13G062800	mRNA	1.12089	3.5011e-06	1.33887e-06	structural maintenance of chromosomes protein 4
GLYMA_12G002400	mRNA	-4.1649	0	0	cytokinin-regulated kinase
GLYMA_01G210700	mRNA	3.20925	1.41546e-22	2.59974e-23	uncharacterized LOC100820460
GLYMA_17G216800	mRNA	1.84325	6.35228e-29	9.96965e-30	zinc finger protein 3
GLYMA_17G048900	mRNA	-1.49225	8.30592e-49	8.97062e-50	kinase-like protein
GLYMA_08G297900	mRNA	-1.00476	1.33172e-98	8.17371e-100	protein kinase
GLYMA_09G056300	mRNA	-1.29515	1.19467e-290	2.72324e-292	plasma membrane ATPase 4
GLYMA_01G019700	mRNA	1.7602	3.66261e-31	5.48467e-32	transcription factor bHLH93
GLYMA_01G205900	mRNA	-1.87717	8.55199e-162	3.36717e-163	phospholipase A1-Ibeta2, chloroplastic
GLYMA_09G041000	mRNA	1.15572	2.6384e-17	5.74873e-18	probable polygalacturonase
GLYMA_05G067800	mRNA	-1.88787	3.9113e-13	9.97689e-14	NAK-type protein kinase
GLYMA_10G271200	mRNA	-1.0462	6.4892e-50	6.89527e-51	wall-associated kinase
GLYMA_06G078400	mRNA	-2.21742	0	0	cation transport regulator-like protein 2-like
GLYMA_14G217200	mRNA	-1.17573	2.74305e-120	1.40686e-121	bZIP transcription factor 3
GLYMA_07G048900	mRNA	-3.82929	1.19923e-271	2.91673e-273	anthranilate N-methyltransferase
GLYMA_04G216900	mRNA	-1.58921	1.79878e-16	4.03553e-17	citrate-binding protein
GLYMA_06G240300	mRNA	-1.45067	1.3475e-12	3.52683e-13	uncharacterized LOC100526932
GLYMA_03G177100	mRNA	-1.53532	2.54101e-07	8.91277e-08	zinc finger CCCH domain-containing protein 11
GLYMA_16G080800	mRNA	-1.6325	1.5526e-32	2.25429e-33	uncharacterized LOC100526937
GLYMA_10G155200	mRNA	1.58609	1.49649e-07	5.1556e-08	uncharacterized GPI-anchored protein At3g06035
GLYMA_12G211800	mRNA	1.27299	4.49486e-21	8.62694e-22	serine/threonine-protein kinase
GLYMA_20G224100	mRNA	1.24689	3.79508e-59	3.54829e-60	serine/threonine-protein kinase Nek2
GLYMA_07G141900	mRNA	1.96718	1.13655e-19	2.28055e-20	uncharacterized LOC100789408
GLYMA_07G020500	mRNA	-1.56334	5.27999e-05	2.25179e-05	beta-glucuronosyltransferase GlcAT14A
GLYMA_20G049800	mRNA	1.99724	5.32115e-41	6.53047e-42	non-specific lipid transfer protein GPI-anchored 2
GLYMA_19G159000	mRNA	1.97595	7.4006e-18	1.58465e-18	sulfate transporter 3.1
GLYMA_13G068800	mRNA	-2.28425	1.92944e-232	5.44504e-234	cytochrome P450 82A3-like
GLYMA_02G037100	mRNA	-1.89864	4.59123e-110	2.55256e-111	cysteine-rich receptor-like protein kinase
GLYMA_06G035300	mRNA	-2.00481	2.66052e-17	5.79766e-18	cytochrome P450 CYP82D47
GLYMA_06G020500	mRNA	4.42661	1.05793e-10	3.02538e-11	phospholipase D delta
GLYMA_10G148700	mRNA	-3.10737	2.80992e-49	3.0187e-50	calmodulin-binding protein 60 G
GLYMA_19G244300	mRNA	-2.46578	8.71082e-05	3.79416e-05	calmodulin
GLYMA_09G107400	mRNA	1.10705	4.56782e-22	8.5104e-23	zinc finger protein 8
GLYMA_04G098000	mRNA	-2.07346	4.99528e-17	1.09917e-17	putative clathrin assembly protein At4g40080
GLYMA_11G166800	mRNA	4.92602	0.000124969	5.53579e-05	spermidine hydroxycinnamoyl transferase
GLYMA_14G172500	mRNA	-2.30966	5.60489e-25	9.65401e-26	annexin D2-like
GLYMA_02G104600	mRNA	-3.8674	2.26526e-89	1.5182e-90	UDP-glucosyl transferase 73B2
GLYMA_02G006800	mRNA	-2.1621	3.48086e-05	1.4575e-05	transcription factor MYB61
GLYMA_09G070500	mRNA	-1.46337	7.64118e-213	2.35434e-214	protein STRICTOSIDINE SYNTHASE-LIKE 4
GLYMA_11G002100	mRNA	3.1371	0.000356091	0.000165603	uncharacterized LOC100797069
GLYMA_01G030000	mRNA	1.96718	2.335e-06	8.81094e-07	uncharacterized LOC100798784
GLYMA_10G181400	mRNA	-1.0163	3.70059e-84	2.60025e-85	probable methyltransferase PMT3
GLYMA_19G144700	mRNA	-3.46253	3.04363e-45	3.48389e-46	cytochrome P450 93A2-like
GLYMA_17G205800	mRNA	4.55214	0.000977298	0.000479362	probable indole-3-pyruvate monooxygenase YUCCA4
GLYMA_11G213200	mRNA	-1.90565	4.43362e-30	6.77827e-31	uncharacterized LOC100797065
GLYMA_10G139400	mRNA	-1.5375	1.2204e-49	1.30309e-50	uncharacterized LOC100814291
GLYMA_17G174100	mRNA	1.42286	3.11236e-07	1.09796e-07	uncharacterized LOC100816052
GLYMA_04G081900	mRNA	1.01527	1.14353e-05	4.56942e-06	U-box domain-containing protein 26
GLYMA_10G290500	mRNA	-2.97534	1.81577e-62	1.62936e-63	F-box protein At2g39490
GLYMA_04G251000	mRNA	-1.59826	1.66859e-29	2.58421e-30	uncharacterized LOC100812537
GLYMA_04G223600	mRNA	1.07524	4.34537e-05	1.83755e-05	protein NETWORKED 4B
GLYMA_02G267900	mRNA	-1.85282	0	0	probable tyrosine-protein phosphatase DSP4
GLYMA_09G047300	mRNA	1.35941	2.90532e-06	1.10462e-06	DNA replication licensing factor MCM6
GLYMA_10G065600	mRNA	4.32473	6.00252e-10	1.78513e-10	glucomannan 4-beta-mannosyltransferase 9
GLYMA_09G031400	mRNA	1.05171	7.35519e-11	2.08512e-11	probable boron transporter 2
GLYMA_04G083900	mRNA	-1.1422	2.88922e-30	4.39586e-31	uncharacterized LOC100812528
GLYMA_04G255800	mRNA	-1.54164	4.80907e-85	3.3516e-86	glucuronoxylan 4-O-methyltransferase 1
GLYMA_01G211000	mRNA	1.08125	3.35465e-08	1.10633e-08	acid beta-fructofuranosidase
GLYMA_11G057000	mRNA	1.30937	3.31304e-15	7.77153e-16	uncharacterized LOC100797055
GLYMA_01G024900	mRNA	4.55214	0.000977298	0.000479362	uncharacterized LOC102669053
GLYMA_07G053100	mRNA	-1.08477	1.34131e-27	2.17317e-28	calcium-transporting ATPase, endoplasmic reticulum-type
GLYMA_07G265000	mRNA	-4.49362	4.64646e-238	1.27453e-239	uncharacterized LOC100800496
GLYMA_16G165900	mRNA	-1.7538	0	0	cellulose synthase A catalytic subunit 2 [UDP-forming]
GLYMA_11G125500	mRNA	-1.46578	2.54068e-10	7.41179e-11	protein NLP9
GLYMA_02G013900	mRNA	1.21741	5.52948e-09	1.74049e-09	transcription factor MYB12
GLYMA_04G208200	mRNA	1.24729	0.000121681	5.38202e-05	aspartic proteinase Asp1
GLYMA_09G054900	mRNA	-2.36986	1.26827e-13	3.17283e-14	uncharacterized LOC100814269
GLYMA_17G085000	mRNA	-1.17368	3.34035e-84	2.3453e-85	L-type lectin-domain containing receptor kinase S.1
GLYMA_08G094800	mRNA	-1.25218	1.51785e-26	2.5192e-27	cysteine-rich receptor-like protein kinase 10
GLYMA_17G0820001	mRNA	-1.29611	2.14919e-128	1.04017e-129	O-fucosyltransferase 34
GLYMA_16G162400	mRNA	-4.61778	0.000816882	0.000396525	tryptophan aminotransferase-related protein 4
GLYMA_09G126500	mRNA	7.93296	4.89906e-27	8.0362e-28	S-type anion channel SLAH3
GLYMA_16G023600	mRNA	1.15666	4.00916e-19	8.19541e-20	auxin response factor 9
GLYMA_16G050700	mRNA	-2.98391	1.15263e-20	2.24239e-21	GEM-like protein 5
GLYMA_01G097900	mRNA	-1.41241	1.39859e-225	4.0461e-227	E3 ubiquitin-protein ligase WAVH1
GLYMA_20G006100	mRNA	-2.84018	0.000194341	8.78259e-05	uncharacterized protein At4g15970
GLYMA_18G265200	mRNA	3.49074	2.04393e-05	8.35571e-06	protein WVD2-like 4
GLYMA_12G181700	mRNA	1.27651	2.87694e-07	1.01334e-07	putative phytosulfokines 6-like
GLYMA_18G216800	mRNA	-1.78652	0	0	probable LRR receptor-like serine/threonine-protein kinase At1g06840
GLYMA_10G202700	mRNA	1.7377	4.70018e-06	1.81734e-06	transcription factor SRG-like protein
GLYMA_05G195900	mRNA	1.15982	8.16356e-05	3.545e-05	uncharacterized LOC100797103
GLYMA_09G271300	mRNA	1.11157	9.63231e-05	4.21773e-05	uncharacterized LOC100795802
GLYMA_02G311200	mRNA	-1.60887	1.29021e-139	5.80112e-141	probable serine/threonine-protein kinase PIX13
GLYMA_19G263100	mRNA	-4.45603	8.44446e-54	8.49857e-55	potassium transporter 5
GLYMA_03G175800	mRNA	3.32473	1.69177e-08	5.48792e-09	protein ALUMINUM SENSITIVE 3-like
GLYMA_17G141600	mRNA	-1.22112	2.5321e-13	6.40775e-14	putative glucuronosyltransferase PGSIP7
GLYMA_20G216000	mRNA	-4.03282	0.000171466	7.70699e-05	alpha-galactosidase
GLYMA_02G261900	mRNA	-2.17375	2.33607e-70	1.90007e-71	abscisic acid receptor PYL4
GLYMA_09G049500	mRNA	-2.10644	1.15513e-91	7.60952e-93	serine carboxypeptidase-like
GLYMA_09G027500	mRNA	-2.72584	2.14123e-45	2.44395e-46	wall-associated receptor kinase-like 8
GLYMA_17G074400	mRNA	1.23021	9.04271e-05	3.94415e-05	delta-12 desaturase, chloroplastic
GLYMA_19G226800	mRNA	-3.61778	3.30184e-08	1.08801e-08	protein NIM1-INTERACTING 1
GLYMA_18G171700	mRNA	-4.02529	1.62767e-41	1.98206e-42	probable serine/threonine-protein kinase PBL26
GLYMA_09G276900	mRNA	-1.4191	8.54644e-11	2.43332e-11	TATA-box-binding protein
GLYMA_17G240100	mRNA	-1.50987	1.86854e-08	6.07614e-09	ethylene-responsive transcription factor RAP2-1
GLYMA_10G067200	mRNA	1.17948	1.23377e-05	4.94451e-06	growth-regulating factor 3
GLYMA_10G267300	mRNA	-2.78771	2.56129e-05	1.05873e-05	protein DETOXIFICATION 12
GLYMA_09G244900	mRNA	1.02493	1.79093e-48	1.945e-49	2-dehydro-3-deoxyphosphooctonate aldolase-like protein
GLYMA_17G255800	mRNA	-1.01496	1.55444e-117	8.15896e-119	transcription factor RF2a
GLYMA_18G017700	mRNA	-1.49563	4.03251e-136	1.8549e-137	uncharacterized LOC100814298
GLYMA_12G113800	mRNA	-3.47761	7.79613e-20	1.55646e-20	epoxide hydrolase 2-like
GLYMA_15G120800	mRNA	1.94118	5.07218e-12	1.35977e-12	phosphatidylinositol/phosphatidylcholine transfer protein SFH9
GLYMA_06G081100	mRNA	-1.93404	4.09329e-65	3.5637e-66	BURP domain protein RD22
GLYMA_06G178000	mRNA	-2.67404	2.2111e-184	7.74714e-186	uncharacterized LOC100797123
GLYMA_13G284600	mRNA	2.50323	6.39742e-13	1.65051e-13	indole-3-acetic acid-amido synthetase GH3.6
GLYMA_11G050800	mRNA	1.67767	0.000515591	0.000244243	putative vacuolar protein sorting-associated protein 13B
GLYMA_13G220900	mRNA	-1.30753	1.12335e-188	3.8563e-190	CSC1-like protein ERD4
GLYMA_19G027500	mRNA	2.01157	0.000157597	7.05844e-05	cell wall protein RBR3
GLYMA_04G042200	mRNA	-1.87236	1.10012e-07	3.75287e-08	probable carbohydrate esterase At4g34215
GLYMA_18G155200	mRNA	1.11796	7.64751e-07	2.77896e-07	U-box domain-containing protein 9
GLYMA_01G195000	mRNA	2.23188	1.33718e-21	2.52341e-22	galactomannan galactosyltransferase 1
GLYMA_20G200700	mRNA	-1.43543	1.67343e-54	1.67001e-55	uncharacterized LOC100814338
GLYMA_10G229900	mRNA	1.01693	1.57314e-05	6.36333e-06	SPX domain-containing membrane protein At4g22990
GLYMA_07G150000	mRNA	2.06671	1.43484e-07	4.9389e-08	GDSL esterase/lipase CPRD49
GLYMA_13G083000	mRNA	1.17046	2.3517e-09	7.2324e-10	O-fucosyltransferase 10
GLYMA_04G164400	mRNA	-2.4341	0	0	SNAP25 homologous protein SNAP33-like
GLYMA_04G030400	mRNA	1.61048	1.06113e-19	2.12689e-20	mannan endo-1,4-beta-mannosidase 7-like
GLYMA_13G067900	mRNA	-2.75865	2.20589e-14	5.33984e-15	probable galacturonosyltransferase-like 10
GLYMA_04G236400	mRNA	-1.07411	2.86528e-81	2.06722e-82	CCT motif-containing protein
GLYMA_08G132700	mRNA	2.64525	2.39161e-10	6.96844e-11	bifunctional riboflavin biosynthesis protein RIBA 1, chloroplastic
GLYMA_04G169000	mRNA	1.27651	0.000358213	0.000166644	protein RKD1
GLYMA_04G126100	mRNA	1.07701	6.79627e-22	1.27253e-22	uncharacterized LOC100814328
GLYMA_10G288400	mRNA	1.21267	4.0912e-27	6.69316e-28	DNA damage-repair/toleration protein DRT100
GLYMA_14G197300	mRNA	-1.55638	0.000158185	7.08588e-05	protein LIGHT-DEPENDENT SHORT HYPOCOTYLS 6
GLYMA_19G114600	mRNA	-3.49225	2.52007e-05	1.04077e-05	putative ankyrin repeat protein RF_0381
GLYMA_08G087400	mRNA	-3.03282	3.55426e-05	1.48998e-05	uncharacterized LOC100778760
GLYMA_16G039800	mRNA	-2.81322	4.57014e-268	1.12649e-269	myb-like protein X
GLYMA_13G117600	mRNA	-3.75458	3.38088e-249	8.88661e-251	probable WRKY transcription factor 47
GLYMA_05G068100	mRNA	1.29475	3.07226e-15	7.19333e-16	poly(U)-specific endoribonuclease-B
GLYMA_06G069300	mRNA	-1.07911	3.57285e-21	6.83786e-22	probable sugar phosphate/phosphate translocator At5g25400
GLYMA_03G015900	mRNA	-3.20275	0.000262647	0.000120438	BON1-associated protein 2
GLYMA_19G183700	mRNA	5.05464	5.46478e-05	2.33395e-05	auxin-responsive protein SAUR32-like
GLYMA_10G243600	mRNA	-1.49516	3.2401e-27	5.28752e-28	auxin-induced protein PCNT115-like
GLYMA_02G097400	mRNA	2.10116	0	0	probably inactive leucine-rich repeat receptor-like protein kinase At3g28040
GLYMA_18G106400	mRNA	5.05464	5.46478e-05	2.33395e-05	uncharacterized LOC100810866
GLYMA_10G156500	mRNA	-1.51229	3.75463e-32	5.50781e-33	E3 ubiquitin-protein ligase ATL6
GLYMA_06G317800	mRNA	-2.63194	2.08616e-301	4.61315e-303	derlin-1.1
GLYMA_03G257500	mRNA	-1.73626	4.29676e-22	7.99836e-23	cytochrome b561 and DOMON domain-containing protein At3g61750
GLYMA_13G224900	mRNA	2.00057	1.03044e-167	3.89697e-169	aquaporin NIP1-8
GLYMA_13G253700	mRNA	-1.26179	5.31684e-17	1.17108e-17	probable sphingolipid transporter spinster homolog 2
GLYMA_11G172500	mRNA	-1.51281	6.85374e-05	2.95342e-05	gibberellin 2-beta-dioxygenase 8-like
GLYMA_18G294400	mRNA	-2.79836	4.3813e-17	9.6299e-18	cysteine-rich receptor-like protein kinase 19
GLYMA_02G095700	mRNA	-2.57471	2.70402e-15	6.31712e-16	uncharacterized LOC100795820
GLYMA_04G100300	mRNA	-4.43353	0	0	protein EXORDIUM-like 1
GLYMA_06G133400	mRNA	-1.01438	5.81011e-72	4.63066e-73	GTPase-activating protein gyp7
GLYMA_08G023400	mRNA	-2.03961	3.8267e-24	6.70912e-25	GDSL esterase/lipase At4g10955
GLYMA_06G068100	mRNA	-1.43115	1.33042e-40	1.64475e-41	G-type lectin S-receptor-like serine/threonine-protein kinase SD2-5
GLYMA_02G305500	mRNA	1.11402	3.76777e-05	1.58385e-05	uncharacterized LOC102666892
GLYMA_08G140200	mRNA	2.6635	1.5989e-26	2.65633e-27	alanine--glyoxylate aminotransferase 2 homolog 1, mitochondrial
GLYMA_15G179600	mRNA	-3.06207	3.77114e-248	9.93297e-250	protein TIFY 10A
GLYMA_19G028500	mRNA	-2.31593	9.63908e-71	7.798e-72	UDP-glucose 6-dehydrogenase 1
GLYMA_17G131800	mRNA	-8.30895	8.94971e-33	1.28969e-33	ethylene-responsive transcription factor ERF027
GLYMA_02G025400	mRNA	1.48375	4.18204e-08	1.38626e-08	transcription factor BHLH089
GLYMA_04G104400	mRNA	-1.7223	5.13375e-46	5.80076e-47	phosphatidylinositol transfer protein 3
GLYMA_17G0419002	mRNA	-1.30131	0.000413391	0.000193637	uncharacterized LOC100778789
GLYMA_15G079500	mRNA	4.61453	2.39419e-184	8.39516e-186	GDSL esterase/lipase At5g45950-like
GLYMA_19G247000	mRNA	-1.01802	9.09767e-46	1.03219e-46	inositol phosphorylceramide glucuronosyltransferase 1
GLYMA_10G295300	mRNA	-2.49225	8.01107e-18	1.71777e-18	Glycinol 4-dimethylallyltransferase
GLYMA_08G105700	mRNA	4.09436	1.70662e-216	5.14197e-218	rho GDP-dissociation inhibitor 1
GLYMA_13G313000	mRNA	-1.09128	2.87372e-95	1.81944e-96	transcription factor LHW
GLYMA_14G153800	mRNA	-2.5637	1.80052e-64	1.57886e-65	proline--tRNA ligase, cytoplasmic-like
GLYMA_14G071600	mRNA	3.82516	6.34419e-07	2.29065e-07	fatty alcohol:caffeoyl-CoA acyltransferase
GLYMA_03G042700	mRNA	-3.04497	1.46772e-183	5.17055e-185	probable WRKY transcription factor 33
GLYMA_13G234500	mRNA	-2.81043	1.14824e-08	3.68626e-09	glutaredoxin-C9
GLYMA_04G034500	mRNA	-1.03282	4.82151e-38	6.23543e-39	E3 ubiquitin-protein ligase RNF5
GLYMA_11G233900	mRNA	-1.94888	2.63602e-45	3.01445e-46	prephenate dehydrogenase 2
GLYMA_19G173800	mRNA	-1.22739	2.53617e-23	4.55784e-24	WAT1-related protein At2g37460
GLYMA_09G063000	mRNA	1.48025	2.20854e-10	6.42237e-11	probable polyamine oxidase 5
GLYMA_01G219400	mRNA	-1.51073	8.90245e-151	3.71633e-152	uncharacterized LOC100306570
GLYMA_10G205200	mRNA	1.52357	0.000124755	5.52562e-05	uncharacterized LOC100800405
GLYMA_10G169600	mRNA	-1.70646	1.42568e-133	6.66678e-135	F-box protein PP2-like
GLYMA_07G030500	mRNA	-1.43275	2.25028e-07	7.85865e-08	uncharacterized LOC100784802
GLYMA_15G225200	mRNA	-6.49225	1.01581e-21	1.91279e-22	putative disease resistance protein At3g14460
GLYMA_04G098100	mRNA	-1.98391	3.62072e-07	1.28391e-07	RING-H2 finger protein ATL38
GLYMA_18G062000	mRNA	2.68215	4.57544e-74	3.56678e-75	microsomal omega-3 fatty acid desaturase
GLYMA_03G1938002	mRNA	-1.08021	0	0	uridine nucleosidase 1
GLYMA_06G202300	mRNA	-1.67334	5.57089e-117	2.94532e-118	flavonoid 3'-hydroxylase
GLYMA_19G152100	mRNA	3.28911	9.98526e-21	1.9396e-21	receptor-like cytosolic serine/threonine-protein kinase RBK2
GLYMA_14G056800	mRNA	1.58419	5.49956e-171	2.04537e-172	ferritin
GLYMA_11G076100	mRNA	-1.52467	7.11449e-11	2.01475e-11	filament-like plant protein 4
GLYMA_11G142600	mRNA	-1.79675	1.48694e-17	3.21431e-18	protein UPSTREAM OF FLC
GLYMA_11G010500	mRNA	-1.982	1.89106e-65	1.6397e-66	4-coumarate:CoA ligase isoenzyme 3
GLYMA_03G201300	mRNA	-4.67089	1.67239e-114	8.98326e-116	syringolide-induced protein B13-1-9
GLYMA_20G111800	mRNA	-2.03282	1.0258e-06	3.76352e-07	syringolide-induced protein 1-3-1B
GLYMA_U040600	mRNA	-3.2623	1.46923e-99	8.95359e-101	syringolide-induced protein B13-1-1
GLYMA_03G001500	mRNA	-2.17177	3.2491e-71	2.6108e-72	syringolide-induced protein B15-3-5
GLYMA_01G239600	mRNA	-1.92436	2.20994e-188	7.61049e-190	2-hydroxyisoflavanone dehydratase
GLYMA_13G118500	mRNA	-2.79181	7.35326e-15	1.74493e-15	ABC transporter B family member 4
GLYMA_08G194600	mRNA	-1.51298	0	0	ABC transporter C family member 8
GLYMA_11G169900	mRNA	1.22714	6.9305e-63	6.19257e-64	potassium transporter 1
GLYMA_16G064100	mRNA	-3.29553	0	0	MDIS1-interacting receptor like kinase 2
GLYMA_03G041300	mRNA	-1.61778	9.3e-33	1.34194e-33	senescence associated gene 20
GLYMA_18G277300	mRNA	-2.01299	6.94081e-178	2.49434e-179	6-phosphogluconate dehydrogenase
GLYMA_06G104800	mRNA	-1.55979	4.28938e-92	2.8093e-93	probable trehalose-phosphate phosphatase J
GLYMA_03G221700	mRNA	-2.67668	7.71881e-05	3.3425e-05	R2R3-type MYB transcription factor MYB12a
GLYMA_06G313700	mRNA	2.34064	2.86819e-08	9.42064e-09	protein ZINC INDUCED FACILITATOR 1
GLYMA_13G270400	mRNA	-1.51489	2.53408e-07	8.8857e-08	phosphoenolpyruvate carboxylase
GLYMA_02G218100	mRNA	1.03915	3.55918e-40	4.44278e-41	auxin-responsive protein IAA9
GLYMA_13G224100	mRNA	-1.03282	3.38961e-05	1.41712e-05	heat shock 70 kDa protein-like
GLYMA_15G152900	mRNA	-3.50942	0	0	SOYBEAN GENE REGULATED BY COLD 2
GLYMA_17G187600	mRNA	-1.2322	0	0	src1 protein
GLYMA_05G049900	mRNA	-6.79437	2.81888e-101	1.69018e-102	dehydration-responsive element-binding protein 1F
GLYMA_20G222300	mRNA	-7.29021	2.33869e-35	3.19987e-36	activating signal cointegrator 1
GLYMA_18G228600	mRNA	-3.78771	4.12115e-12	1.10071e-12	uncharacterized LOC100306578
GLYMA_12G182100	mRNA	2.90578	9.25843e-05	4.04543e-05	uncharacterized LOC100798692
GLYMA_04G127100	mRNA	-1.90193	8.9541e-19	1.85454e-19	cysteine-rich receptor-like protein kinase
GLYMA_03G155800	mRNA	1.25808	2.98786e-13	7.58392e-14	protein MARD1
GLYMA_04G027800	mRNA	1.1185	7.12768e-36	9.64156e-37	protein WALLS ARE THIN 1
GLYMA_15G036100	mRNA	-1.89164	7.25266e-85	5.05857e-86	E3 ubiquitin-protein ligase RDUF2
GLYMA_02G052300	mRNA	-3.65731	8.23225e-16	1.89224e-16	epoxide hydrolase A
GLYMA_04G102400	mRNA	1.66762	1.75488e-09	5.35867e-10	uncharacterized LOC100306574
GLYMA_05G247500	mRNA	-1.48739	2.87618e-06	1.09287e-06	potassium channel SKOR-like
GLYMA_02G001100	mRNA	-1.5409	1.37365e-105	7.91415e-107	benzyl alcohol O-benzoyltransferase
GLYMA_08G292300	mRNA	-1.48579	2.47453e-24	4.32427e-25	metalloendoproteinase 2-MMP
GLYMA_06G024000	mRNA	-1.58231	3.26371e-56	3.17695e-57	uncharacterized LOC100795719
GLYMA_09G264200	mRNA	-1.6849	8.91063e-05	3.88399e-05	uncharacterized LOC106794683
GLYMA_05G063500	mRNA	-1.42285	4.38641e-78	3.25796e-79	ethylene-responsive transcription factor 5
GLYMA_14G058900	mRNA	-1.03457	1.53094e-33	2.16983e-34	dual specificity tyrosine-phosphorylation-regulated kinase 4
GLYMA_12G227800	mRNA	2.67204	0	0	sodium/calcium exchanger NCL2
GLYMA_20G144600	mRNA	-1.46024	2.96977e-22	5.50793e-23	linoleate 9S-lipoxygenase 5
GLYMA_18G136500	mRNA	-4.14433	3.70158e-27	6.05172e-28	potassium transporter 6
GLYMA_08G354300	mRNA	-1.84018	1.1423e-13	2.85148e-14	cyclin-dependent kinase inhibitor 4
GLYMA_08G047500	mRNA	1.63371	5.10489e-38	6.60748e-39	vacuolar iron transporter 1
GLYMA_08G067600	mRNA	-1.38253	1.23104e-290	2.80949e-292	cysteine hydrolases superfamily protein
GLYMA_15G002200	mRNA	1.88561	1.2131e-138	5.48418e-140	ent-kaurene oxidase, chloroplastic
GLYMA_14G048100	mRNA	-3.20275	0.000262647	0.000120438	MDIS1-interacting receptor like kinase 2
GLYMA_08G282800	mRNA	-1.44144	0	0	peroxisomal copper-containing amine oxidase
GLYMA_16G170100	mRNA	-4.42514	5.05067e-305	1.10171e-306	extensin-like
GLYMA_14G195200	mRNA	-3.47493	2.05494e-206	6.52203e-208	probable protein phosphatase 2C 25
GLYMA_13G236100	mRNA	-2.41348	0	0	protein E6
GLYMA_14G016800	mRNA	3.90578	1.8386e-10	5.32755e-11	kinesin-like protein KIN-12F
GLYMA_13G087100	mRNA	-2.58031	1.32042e-55	1.29468e-56	low affinity sulfate transporter 3
GLYMA_07G011800	mRNA	-5.69288	0	0	inorganic pyrophosphatase 2
GLYMA_01G229600	mRNA	3.1371	8.16516e-09	2.59693e-09	cell division cycle 20.2, cofactor of APC complex
GLYMA_07G079600	mRNA	-1.95036	0.000143221	6.38138e-05	uncharacterized LOC100815990
GLYMA_14G135000	mRNA	5.82516	7.49357e-08	2.52513e-08	serine/threonine-protein phosphatase BSL3
GLYMA_07G251700	mRNA	1.26061	6.59245e-08	2.21492e-08	probable serine/threonine-protein kinase At1g54610
GLYMA_06G156300	mRNA	-1.7916	5.61201e-94	3.60056e-95	lipase-like PAD4
GLYMA_13G353100	mRNA	1.85799	3.56037e-128	1.72704e-129	GDSL esterase/lipase APG
GLYMA_06G119700	mRNA	-1.05363	1.51461e-111	8.30918e-113	TOM1-like protein 4
GLYMA_08G182900	mRNA	-1.92326	1.23089e-55	1.20655e-56	WAT1-related protein At1g68170
GLYMA_18G244500	mRNA	-1.80529	9.3161e-189	3.19554e-190	phospholipase A(1) LCAT3
GLYMA_19G121600	mRNA	-2.18445	6.34105e-52	6.53902e-53	dihydrofolate reductase
GLYMA_14G205600	mRNA	-1.47339	1.661e-28	2.63178e-29	pathogenesis-related genes transcriptional activator PTI6
GLYMA_09G145600	mRNA	-1.95482	3.29556e-23	5.94234e-24	receptor-like protein 7
GLYMA_01G154800	mRNA	-1.2388	2.36577e-21	4.49674e-22	uncharacterized LOC100782168
GLYMA_10G231500	mRNA	-1.91151	5.54182e-69	4.59816e-70	probable receptor-like protein kinase At5g24010
GLYMA_11G001200	mRNA	-2.40315	0	0	leucine-rich repeat protein 2
GLYMA_16G175200	mRNA	-3.07591	0	0	isoflavone 7-O-glucosyltransferase UGT3
GLYMA_11G234100	mRNA	-1.73854	4.51902e-13	1.15665e-13	copper transport protein ATX1
GLYMA_16G151200	mRNA	3.52177	5.51889e-10	1.63919e-10	syntaxin-related protein KNOLLE
GLYMA_08G232900	mRNA	3.60791	2.61354e-178	9.36385e-180	uncharacterized LOC100793991
GLYMA_15G016000	mRNA	-2.17032	2.90501e-06	1.10442e-06	uncharacterized LOC112999630
GLYMA_15G128700	mRNA	-2.63768	6.69923e-87	4.5995e-88	peroxidase
GLYMA_08G299900	mRNA	-1.2899	0	0	delta(8)-fatty-acid desaturase 2-like
GLYMA_16G121700	mRNA	5.96718	5.73524e-16	1.3114e-16	prolyl 4-hydroxylase subunit alpha-1-like
GLYMA_02G288600	mRNA	-1.44433	2.51331e-69	2.07438e-70	probable LRR receptor-like serine/threonine-protein kinase At1g07650
GLYMA_01G106500	mRNA	2.40014	0.000136609	6.07189e-05	uncharacterized LOC100782156
GLYMA_07G051500	mRNA	1.76973	2.52075e-27	4.10468e-28	transcription factor MYC2
GLYMA_02G228100	mRNA	-1.51758	1.74218e-218	5.19684e-220	asparagine synthetase-like
GLYMA_02G148200	mRNA	-4.22989	0	0	basic 7S globulin
GLYMA_20G046100	mRNA	1.1895	6.38811e-11	1.804e-11	putative disease resistance RPP13-like protein 1
GLYMA_12G044700	mRNA	-1.89718	0	0	polyol transporter 5
GLYMA_16G094100	mRNA	-1.27568	5.98038e-09	1.88698e-09	galactan beta-1,4-galactosyltransferase GALS3
GLYMA_08G118900	mRNA	-3.55067	1.95178e-74	1.51353e-75	probable glutathione S-transferase
GLYMA_15G107200	mRNA	1.73216	3.44168e-45	3.94421e-46	uncharacterized GPI-anchored protein At1g61900
GLYMA_15G234100	mRNA	1.35741	2.20562e-11	6.08853e-12	trihelix transcription factor ASIL1
GLYMA_17G013600	mRNA	1.13845	7.77404e-158	3.12869e-159	cationic peroxidase 2
GLYMA_16G080100	mRNA	-4.26629	0	0	MLO-like protein 1
GLYMA_13G304300	mRNA	1.14775	1.58712e-13	3.98305e-14	dehydration-responsive element-binding protein
GLYMA_20G213600	mRNA	6.66762	6.15836e-13	1.58648e-13	isoflavone-7-O-methyltransferase 6
GLYMA_06G072000	mRNA	-1.39884	4.15296e-20	8.22099e-21	uncharacterized LOC100805091
GLYMA_13G296500	mRNA	-1.35475	0.000198691	8.99054e-05	uncharacterized LOC100805088
GLYMA_19G101500	mRNA	2.8455	1.44269e-20	2.81417e-21	uncharacterized LOC102661637
GLYMA_14G085400	mRNA	2.20422	1.62497e-16	3.64206e-17	uncharacterized protein At4g06744
GLYMA_07G073300	mRNA	-1.39494	6.96301e-30	1.07079e-30	tRNA-specific adenosine deaminase TAD1
GLYMA_04G142400	mRNA	-1.92591	3.47682e-27	5.67857e-28	uncharacterized LOC102659402
GLYMA_15G011900	mRNA	-2.80375	0	0	pleiotropic drug resistance protein 1
GLYMA_05G204800	mRNA	-1.80172	0	0	protein P21-like
GLYMA_03G1577002	mRNA	-2.3709	0	0	calcium-transporting ATPase 12, plasma membrane-type
GLYMA_14G205300	mRNA	1.09084	3.72025e-18	7.8716e-19	putative disease resistance protein At5g05400
GLYMA_13G071900	mRNA	-1.03948	9.63607e-10	2.9012e-10	putative disease resistance RPP13-like protein 1
GLYMA_10G193500	mRNA	-1.64652	8.92546e-30	1.37502e-30	iron-superoxide dismutase
GLYMA_U021800	mRNA	-2.60619	0	0	mitogen-activated protein kinase 1
GLYMA_13G101100	mRNA	-3.8229	4.07059e-18	8.62288e-19	transcription factor bHLH35
GLYMA_10G257900	mRNA	-1.01716	2.85389e-57	2.74067e-58	zinc finger protein ZAT10
GLYMA_06G136500	mRNA	1.28377	0	0	ribosome-binding factor PSRP1, chloroplastic
GLYMA_20G175200	mRNA	-6.73326	3.32396e-25	5.69719e-26	calcium-dependent protein kinase SK5-like
GLYMA_03G040300	mRNA	1.07955	1.23606e-179	4.40499e-181	non-specific lipid-transfer protein 1
GLYMA_20G152600	mRNA	7.31812	1.16105e-143	5.07157e-145	subtilisin-like protease SBT1.3
GLYMA_07G245600	mRNA	2.18404	3.1072e-10	9.10769e-11	uncharacterized LOC102663274
GLYMA_08G017300	mRNA	2.13034	3.81197e-96	2.38852e-97	probable polygalacturonase
GLYMA_15G062400	mRNA	-5.58907	0	0	pathogenesis-related protein 1
GLYMA_09G150100	mRNA	-1.92973	5.53381e-12	1.48579e-12	receptor-like serine/threonine-protein kinase At4g25390
GLYMA_01G235600	mRNA	-1.74711	0	0	12-oxophytodienoate reductase 2
GLYMA_11G059500	mRNA	-1.25315	1.29122e-13	3.23129e-14	methylesterase 3
GLYMA_03G183100	mRNA	4.77453	0.000305213	0.000140926	indole-3-acetic acid-induced protein ARG7
GLYMA_02G171900	mRNA	1.30444	1.39199e-19	2.80258e-20	uncharacterized LOC102659370
GLYMA_04G131600	mRNA	4.61507	1.12939e-06	4.15663e-07	far upstream element-binding protein 1-like
GLYMA_12G055200	mRNA	1.66232	1.47483e-06	5.4807e-07	histone H3.2
GLYMA_04G253000	mRNA	-1.96474	4.07987e-197	1.34828e-198	oxysterol-binding protein-related protein 1C
GLYMA_03G074600	mRNA	-2.00245	4.77601e-11	1.33989e-11	SOUL heme-binding family protein
GLYMA_15G026400	mRNA	-4.9543	0	0	linoleate 9S-lipoxygenase
GLYMA_15G175600	mRNA	1.75568	0.000219722	9.98261e-05	protein SUPPRESSOR OF GENE SILENCING 3
GLYMA_01G036000	mRNA	-3.56532	6.7707e-17	1.49629e-17	UDP-glycosyltransferase 74B1
GLYMA_01G022900	mRNA	1.61627	2.02911e-06	7.61849e-07	protein NETWORKED 2D
GLYMA_02G279000	mRNA	1.13507	6.63324e-33	9.53342e-34	uncharacterized LOC100803404
GLYMA_02G294000	mRNA	-2.90007	1.66202e-216	5.00307e-218	glucan endo-1,3-beta-glucosidase 12
GLYMA_03G253200	mRNA	-2.35415	0	0	indole-3-acetic acid induced protein ARG-2 homolog
GLYMA_02G022300	mRNA	-1.21556	9.15298e-49	9.89794e-50	homeodomain-leucine zipper protein 57
GLYMA_01G193600	mRNA	-1.19405	6.13028e-96	3.85785e-97	plasma membrane Ca2+-ATPase
GLYMA_16G136600	mRNA	-2.20221	0	0	resistance protein MG23
GLYMA_16G137200	mRNA	-1.35023	2.57941e-20	5.07021e-21	resistance protein LM12
GLYMA_17G090900	mRNA	-2.59448	2.08441e-45	2.37797e-46	U-box domain-containing protein 19
GLYMA_09G153700	mRNA	1.79315	0.00014221	6.33536e-05	nucleolin
GLYMA_07G140100	mRNA	-2.93971	4.29186e-38	5.54577e-39	glutathione S-transferase GST 6
GLYMA_01G040200	mRNA	1.64984	0	0	glutathione S-transferase GST 5
GLYMA_17G042600	mRNA	3.12135	1.64266e-202	5.28964e-204	uncharacterized LOC100787873
GLYMA_08G070100	mRNA	-3.398	1.0054e-178	3.58847e-180	RING-H2 finger protein ATL54
GLYMA_02G309300	mRNA	-2.44786	1.95161e-05	7.96289e-06	phenylalanine ammonia-lyase 3.1
GLYMA_16G202500	mRNA	-2.84018	5.08946e-10	1.50803e-10	uncharacterized LOC100499779
GLYMA_16G074200	mRNA	-4.24227	2.58257e-25	4.41766e-26	protein BREVIS RADIX
GLYMA_02G042500	mRNA	-6.11319	3.83711e-49	4.12849e-50	chitinase class I
GLYMA_11G218100	mRNA	1.54142	9.74349e-11	2.78158e-11	zinc finger protein 341
GLYMA_15G257300	mRNA	-2.26252	0	0	1-aminocyclopropane-1-carboxylate oxidase homolog 1
GLYMA_16G136800	mRNA	-2.30864	1.00093e-07	3.40768e-08	TMV resistance protein N-like
GLYMA_14G070600	mRNA	2.84581	0	0	beta-galactosidase 5
GLYMA_02G046200	mRNA	5.55214	1.11016e-06	4.08377e-07	protein POLLENLESS 3-LIKE 2
GLYMA_10G186600	mRNA	-1.07612	2.78151e-25	4.75985e-26	serine/threonine-protein phosphatase PP1
GLYMA_16G185400	mRNA	-3.28916	1.19154e-16	2.65501e-17	receptor-like protein EIX2
GLYMA_18G247000	mRNA	-1.2366	2.08356e-29	3.2337e-30	UDP-glycosyltransferase 74G1
GLYMA_13G237700	mRNA	3.77453	0.000715995	0.000345366	maturation protein pPM32
GLYMA_05G055700	mRNA	-1.34	8.301e-10	2.49177e-10	seed maturation protein PM40
GLYMA_16G195900	mRNA	1.11533	1.51031e-68	1.26096e-69	pentatricopeptide repeat-containing protein At1g12300, mitochondrial-like
GLYMA_07G253400	mRNA	-1.67925	5.488e-240	1.4904e-241	uncharacterized LOC100818988
GLYMA_16G164200	mRNA	-2.76979	6.54387e-60	6.05587e-61	peroxidase
GLYMA_15G089000	mRNA	3.31101	9.31863e-156	3.79097e-157	uncharacterized LOC100791176
GLYMA_02G244300	mRNA	-2.48968	1.07824e-39	1.35768e-40	peroxisomal small heat shock protein
GLYMA_01G129400	mRNA	-1.09792	6.16985e-13	1.58978e-13	alanine--glyoxylate aminotransferase 2 homolog 2, mitochondrial
GLYMA_02G037000	mRNA	1.43066	1.84001e-35	2.50854e-36	2-phytyl-1,4-beta-naphthoquinone methyltransferase, chloroplastic
GLYMA_08G283200	mRNA	4.05464	0.00012312	5.45036e-05	WAT1-related protein At1g68170-like
GLYMA_10G105900	mRNA	-1.1708	6.54896e-32	9.65336e-33	UDP-N-acetylglucosamine--dolichyl-phosphate N-acetylglucosaminephosphotransferase
GLYMA_08G094100	mRNA	-1.08782	6.17737e-51	6.4595e-52	protein OBERON 3
GLYMA_08G287400	mRNA	4.55214	0.000977298	0.000479362	polygalacturonase 1 beta-like protein 3
GLYMA_16G102000	mRNA	-1.51087	0.000713381	0.00034396	zinc finger protein ZAT1
GLYMA_13G250500	mRNA	1.55214	1.61588e-13	4.05655e-14	BTB/POZ domain-containing protein At3g22104
GLYMA_05G139500	mRNA	-3.11642	6.59161e-66	5.68667e-67	cysteine-rich receptor-like protein kinase 10
GLYMA_08G096700	mRNA	-1.43804	7.86193e-18	1.68471e-18	(S)-2-hydroxy-acid oxidase GLO1
GLYMA_20G164900	mRNA	-1.03897	1.88606e-10	5.4692e-11	putative chitinase
GLYMA_10G222400	mRNA	1.13041	1.08842e-10	3.11405e-11	peroxidase 12
GLYMA_13G279900	mRNA	-1.29809	4.95598e-23	8.97414e-24	NAC transcription factor NAC27
GLYMA_20G193400	mRNA	1.87407	0.000626419	0.000299819	uncharacterized LOC102661509
GLYMA_15G021400	mRNA	-1.44369	0	0	stress-induced receptor-like kinase 2
GLYMA_08G173400	mRNA	-1.38481	2.94143e-13	7.46525e-14	NAC domain protein
GLYMA_07G032000	mRNA	1.04925	2.52072e-35	3.44962e-36	F-box only protein 6
GLYMA_14G141000	mRNA	2.88997	0	0	BURP domain-containing protein
GLYMA_02G215800	mRNA	-1.40952	2.66782e-62	2.39686e-63	protein SABRE
GLYMA_12G034100	mRNA	1.28129	4.1862e-06	1.61068e-06	auxin-induced protein X10A-like
GLYMA_05G183500	mRNA	-1.13236	7.45527e-95	4.74657e-96	stress enhanced protein 2, chloroplastic
GLYMA_02G302800	mRNA	1.21511	0.00061143	0.00029222	kinesin-like protein KIN-14F
GLYMA_20G009300	mRNA	-1.62693	5.2017e-89	3.49333e-90	protein DMR6-LIKE OXYGENASE 2
GLYMA_05G098400	mRNA	-1.45452	1.56938e-08	5.08106e-09	uncharacterized LOC100806674
GLYMA_09G012200	mRNA	-3.20275	0.000262647	0.000120438	CASP-like protein 2B1
GLYMA_02G280500	mRNA	-1.1336	4.77743e-39	6.0742e-40	GTP-binding protein At3g49725, chloroplastic
GLYMA_12G199500	mRNA	1.07199	1.04976e-93	6.75223e-95	uncharacterized GPI-anchored protein At4g28100
GLYMA_05G195000	mRNA	-3.82441	5.4399e-262	1.37203e-263	NAC domain-containing protein 2
GLYMA_10G184700	mRNA	-2.69579	0.000592485	0.000282761	putative protease inhibitor
GLYMA_03G181900	mRNA	-1.11344	2.69639e-09	8.32039e-10	adenosine kinase 2
GLYMA_20G142700	mRNA	-1.15993	4.80312e-05	2.03859e-05	uncharacterized LOC100499681
GLYMA_06G186300	mRNA	-1.55054	1.71305e-224	4.9745e-226	betaine aldehyde dehydrogenase
GLYMA_16G152600	mRNA	-3.87412	5.25626e-10	1.55896e-10	glucan endo-1,3-beta-glucosidase 8
GLYMA_05G095400	mRNA	4.96718	9.65741e-05	4.22978e-05	replication protein A 32 kDa subunit B-like
GLYMA_01G168400	mRNA	3.85847	1.07439e-93	6.91362e-95	putative lactoylglutathione lyase
GLYMA_02G151200	mRNA	-1.33238	1.1414e-08	3.66367e-09	ankyrin repeat domain-containing protein 50
GLYMA_02G255400	mRNA	-1.13464	3.13878e-150	1.31457e-151	nematode resistance HS1pro1 protein
GLYMA_06G125200	mRNA	-1.00481	8.73557e-09	2.78276e-09	mitochondrial carrier protein MTM1
GLYMA_06G262100	mRNA	-1.69733	7.78974e-13	2.01843e-13	G-type lectin S-receptor-like serine/threonine-protein kinase At4g27290
GLYMA_03G040600	mRNA	-1.96682	9.06815e-112	4.96245e-113	alanine--glyoxylate aminotransferase 2 homolog 3, mitochondrial
GLYMA_16G180700	mRNA	1.4053	2.29034e-06	8.63491e-07	silicon efflux transporter LSI2-like
GLYMA_18G289600	mRNA	-1.38646	0.000561354	0.000267031	heat shock cognate 70 kDa protein 2
GLYMA_13G236500	mRNA	-2.53463	2.99467e-98	1.84702e-99	ethylene-responsive element binding factor 4
GLYMA_02G100300	mRNA	-2.94408	4.65102e-110	2.58834e-111	stress-induced receptor-like kinase
GLYMA_18G254000	mRNA	-1.11127	0.00083774	0.000407277	MDIS1-interacting receptor like kinase 2
GLYMA_06G182200	mRNA	4.22771	1.40909e-25	2.39478e-26	dof zinc finger protein DOF5.6
GLYMA_10G144000	mRNA	-2.27675	2.70339e-12	7.17292e-13	putative nuclear envelope-associated protein
GLYMA_06G200100	mRNA	-1.2956	3.29457e-111	1.81459e-112	SNAP25 homologous protein SNAP33
GLYMA_06G077400	mRNA	-1.86693	8.23242e-51	8.62299e-52	WRKY transcription factor 37
GLYMA_16G026400	mRNA	-1.79203	1.76244e-274	4.25773e-276	WRKY transcription factor 60
GLYMA_04G198100	mRNA	-3.20275	6.35342e-06	2.48411e-06	auxin-responsive protein SAUR71
GLYMA_12G047500	mRNA	-1.3894	0	0	cold-regulated protein
GLYMA_08G032100	mRNA	1.89792	5.56114e-07	1.99792e-07	leucine-rich repeat/extensin 1-like protein
GLYMA_19G254700	mRNA	3.52177	1.07479e-27	1.7352e-28	putative anthocyanidin reductase
GLYMA_08G290200	mRNA	2.07152	9.50665e-06	3.77142e-06	probable serine/threonine-protein kinase PBL28
GLYMA_05G200900	mRNA	1.06719	1.13162e-18	2.35056e-19	inducer of CBF expression 3
GLYMA_12G103800	mRNA	1.83225	8.71452e-06	3.44541e-06	B-box zinc finger protein 32
GLYMA_08G070800	mRNA	-1.6659	0	0	ABC transporter G family member 11-like
GLYMA_07G251300	mRNA	-2.70515	2.19225e-121	1.1142e-122	CASP-like protein 7
GLYMA_13G166800	mRNA	-2.82675	0	0	SPX domain-containing 7
GLYMA_20G139100	mRNA	-4.55638	2.64996e-06	1.00445e-06	cysteine-rich receptor-like protein kinase
GLYMA_09G045700	mRNA	-2.21565	0	0	cold-regulated protein
GLYMA_18G078600	mRNA	-1.00395	4.52678e-40	5.66049e-41	zinc transporter 11
GLYMA_12G089200	mRNA	-1.18847	8.40345e-10	2.52321e-10	ferredoxin 3-like
GLYMA_15G052700	mRNA	-6.26562	0	0	cationic peroxidase 2
GLYMA_02G069100	mRNA	1.14303	0.000741338	0.000358248	omega-hydroxypalmitate O-feruloyl transferase
GLYMA_17G247900	mRNA	-1.6302	4.10518e-66	3.5248e-67	probable galacturonosyltransferase-like 1
GLYMA_12G088500	mRNA	-2.64848	3.49387e-57	3.36002e-58	uncharacterized LOC100803294
GLYMA_17G227900	mRNA	-2.30514	7.07685e-174	2.5934e-175	fructan 6-exohydrolase
GLYMA_10G039500	mRNA	2.3595	1.96484e-06	7.36782e-07	uncharacterized LOC100805024
GLYMA_08G147400	mRNA	1.39564	6.13986e-19	1.2643e-19	WD repeat-containing protein 44
GLYMA_16G126400	mRNA	2.80007	7.573e-10	2.26622e-10	alpha-mannosidase
GLYMA_16G085700	mRNA	-1.06614	2.2959e-37	3.013e-38	TMV resistance protein N
GLYMA_08G078000	mRNA	-1.50413	2.21905e-100	1.33536e-101	uncharacterized LOC100806745
GLYMA_16G172200	mRNA	-1.95221	7.34411e-11	2.08178e-11	receptor-like protein EIX2
GLYMA_18G107200	mRNA	2.97467	1.73424e-32	2.52132e-33	uncharacterized LOC102661574
GLYMA_09G205300	mRNA	-1.32771	4.5613e-297	1.02481e-298	uncharacterized LOC100791221
GLYMA_19G111000	mRNA	2.81598	1.16065e-06	4.27486e-07	glutamate dehydrogenase 1-like
GLYMA_17G1975001	mRNA	-1.89342	4.40192e-143	1.93e-144	probable WRKY transcription factor 11
GLYMA_18G220500	mRNA	-2.84519	6.30907e-47	7.04104e-48	vestitone reductase
GLYMA_09G165900	mRNA	-1.99554	3.42871e-21	6.55825e-22	uncharacterized LOC100791218
GLYMA_07G111500	mRNA	1.91935	8.2815e-10	2.48547e-10	UPF0481 protein At3g47200
GLYMA_05G211900	mRNA	-2.89264	8.01566e-33	1.15377e-33	probable WRKY transcription factor 29
GLYMA_17G115700	mRNA	-3.35074	1.39336e-67	1.17813e-68	DEAD-box ATP-dependent RNA helicase 52B
GLYMA_06G123700	mRNA	-2.75079	0	0	alpha-amylase inhibitor/lipid transfer/seed storage family protein
GLYMA_16G189500	mRNA	1.32727	0	0	uncharacterized LOC100499700
GLYMA_11G073000	mRNA	-1.60684	6.11476e-55	6.0589e-56	uncharacterized LOC100499701
GLYMA_15G243300	mRNA	-1.19036	5.00772e-14	1.23107e-14	11-oxo-beta-amyrin 30-oxidase
GLYMA_10G154500	mRNA	-1.15653	1.91198e-38	2.45964e-39	probable rRNA-processing protein EBP2 homolog
GLYMA_18G125500	mRNA	-1.24701	6.02915e-256	1.55352e-257	mitochondrial outer membrane protein porin of 36 kDa-like
GLYMA_03G131100	mRNA	-1.63003	0	0	UDP-sulfoquinovose synthase, chloroplastic
GLYMA_06G282600	mRNA	4.28911	1.06995e-09	3.23042e-10	auxin-induced protein 15A
GLYMA_04G200500	mRNA	3.11014	4.26149e-19	8.71704e-20	inducer of CBF expression 1
GLYMA_19G202300	mRNA	-2.1483	0.00042256	0.000198162	VQ motif-containing protein 8, chloroplastic
GLYMA_07G200200	mRNA	1.04335	5.89489e-08	1.97525e-08	18.5 kDa class I heat shock protein
GLYMA_14G140900	mRNA	7.34375	3.89027e-77	2.92022e-78	BURP domain protein 2
GLYMA_07G001500	mRNA	-1.09198	1.57165e-86	1.08248e-87	pyrophosphate-energized membrane proton pump 2
GLYMA_10G194200	mRNA	-2.43762	3.00774e-278	7.16773e-280	DNA-binding domain-containing protein
GLYMA_12G011000	mRNA	-3.25521	3.56245e-06	1.3633e-06	putative calcium-transporting ATPase 11, plasma membrane-type
GLYMA_16G186400	mRNA	-1.32545	4.03636e-07	1.4368e-07	receptor-like protein EIX2
GLYMA_05G090900	mRNA	1.34647	6.65188e-23	1.20976e-23	CDPK-related kinase 5
GLYMA_03G183900	mRNA	-2.20275	1.24604e-08	4.0101e-09	transcription factor RAX2
GLYMA_07G052700	mRNA	-1.69118	1.64805e-53	1.6631e-54	AAA-ATPase At2g46620
GLYMA_06G116100	mRNA	2.58189	5.36131e-08	1.79193e-08	cyclin-A1-1
GLYMA_06G286800	mRNA	-3.42514	4.53512e-05	1.92163e-05	MLO-like protein 12
GLYMA_13G335800	mRNA	-2.66974	1.85164e-09	5.66171e-10	uncharacterized LOC100787788
GLYMA_07G102800	mRNA	1.053	3.0806e-40	3.83448e-41	Down syndrome critical region protein 3 homolog
GLYMA_01G217700	mRNA	-3.24189	3.04415e-169	1.14545e-170	PR-5b protein
GLYMA_20G186500	mRNA	-2.53226	0	0	transcription factor HHO3
GLYMA_14G045300	mRNA	1.3151	0.000291018	0.000134055	inactive protein RESTRICTED TEV MOVEMENT 2
GLYMA_06G265800	mRNA	1.40832	3.95799e-114	2.13251e-115	uncharacterized LOC100787790
GLYMA_20G228000	mRNA	-1.25698	9.34179e-108	5.2854e-109	with no lysine kinase 1
GLYMA_18G260700	mRNA	-3.25124	1.3072e-66	1.11562e-67	probable calcium-binding protein CML45
GLYMA_13G244800	mRNA	1.41899	5.81224e-70	4.74963e-71	uncharacterized LOC100499725
GLYMA_16G064000	mRNA	3.08266	1.74904e-05	7.113e-06	protein WVD2-like 7
GLYMA_04G169300	mRNA	1.10296	1.12583e-29	1.73809e-30	E3 ubiquitin-protein ligase MARCH4
GLYMA_20G068300	mRNA	-2.33604	5.34197e-207	1.68962e-208	metal-nicotianamine transporter YSL1
GLYMA_09G246200	mRNA	2.01157	5.68547e-08	1.90384e-08	formin-like protein 1
GLYMA_09G073600	mRNA	-1.07236	1.7625e-47	1.94247e-48	sucrose synthase
GLYMA_04G205000	mRNA	3.41154	4.23338e-71	3.40748e-72	uncharacterized LOC100805045
GLYMA_19G197400	mRNA	1.14227	1.87699e-07	6.51407e-08	uncharacterized LOC100805043
GLYMA_19G015000	mRNA	-5.80101	2.20768e-156	8.96315e-158	cytochrome P450 82A4-like
GLYMA_09G098000	mRNA	2.21004	5.06583e-109	2.83853e-110	CBL-interacting serine/threonine-protein kinase 6
GLYMA_11G122000	mRNA	1.21716	1.62566e-05	6.58953e-06	uncharacterized LOC100805046
GLYMA_10G248400	mRNA	1.36172	3.92787e-37	5.17718e-38	with no lysine kinase 2
GLYMA_09G276300	mRNA	-2.87636	5.34361e-105	3.09034e-106	with no lysine kinase 10
GLYMA_03G077900	mRNA	-1.41779	1.29492e-102	7.64416e-104	laccase-4
GLYMA_08G078800	mRNA	-3.25521	3.56245e-06	1.3633e-06	polygalacturonase inhibitor 2
GLYMA_08G058400	mRNA	-2.053	1.63889e-32	2.38137e-33	sphingosine kinase 1
GLYMA_15G032400	mRNA	-1.22889	1.55953e-10	4.49935e-11	uncharacterized LOC100798931
GLYMA_08G277000	mRNA	-3.26256	8.94051e-37	1.18939e-37	probable 1-deoxy-D-xylulose-5-phosphate synthase 2, chloroplastic
GLYMA_10G229700	mRNA	-2.32107	2.96077e-17	6.46809e-18	probable membrane-associated kinase regulator 5
GLYMA_07G161900	mRNA	2.06427	2.94628e-100	1.77861e-101	long chain acyl-CoA synthetase 2
GLYMA_14G038500	mRNA	-2.23731	1.08661e-142	4.78197e-144	multicystatin-like
GLYMA_07G258700	mRNA	-1.77368	2.27399e-34	3.1746e-35	beta-glucosidase 46
GLYMA_16G201500	mRNA	-1.49017	2.0884e-49	2.23845e-50	receptor-like serine/threonine-protein kinase At4g25390
GLYMA_16G090900	mRNA	-2.49225	1.03208e-08	3.30435e-09	transcription factor bHLH91
GLYMA_17G128200	mRNA	-1.33049	0	0	cyclin-dependent kinase G-2
GLYMA_02G178100	mRNA	1.55214	0.000231442	0.000105419	MYB-CC domain-containing transcription factor PHR6
GLYMA_19G251600	mRNA	1.82968	9.16724e-05	4.00222e-05	protein ABIL1
GLYMA_18G036400	mRNA	1.08496	0	0	ribulose bisphosphate carboxylase/oxygenase activase, chloroplastic-like
GLYMA_09G085600	mRNA	1.37157	0.000837046	0.000406917	membrane protein PM19L
GLYMA_13G105400	mRNA	-4.61778	0.000816882	0.000396525	putative transcription factor bHLH041
GLYMA_07G089800	mRNA	-1.59625	6.36625e-32	9.3823e-33	cytochrome P450 CYP736A12
GLYMA_18G192800	mRNA	-1.40344	3.44568e-73	2.71239e-74	phosphatidylinositol:ceramide inositolphosphotransferase 1
GLYMA_08G129600	mRNA	-1.42401	1.46054e-11	3.99195e-12	cationic amino acid transporter 1
GLYMA_07G106500	mRNA	4.7848	0.000288085	0.000132633	beta-galactosidase
GLYMA_01G212800	mRNA	-1.02069	4.63157e-33	6.62879e-34	ACT domain-containing protein ACR8
GLYMA_19G195400	mRNA	1.02421	5.30278e-06	2.0601e-06	beta-fructofuranosidase, insoluble isoenzyme 1
GLYMA_13G172300	mRNA	4.74854	1.90136e-13	4.78723e-14	peroxidase 19
GLYMA_10G061700	mRNA	7.01179	7.65381e-16	1.75761e-16	thaumatin-like protein 1b
GLYMA_02G005600	mRNA	-2.39394	1.82166e-94	1.16427e-95	transcription factor MYB13
GLYMA_08G307600	mRNA	-1.28075	1.02201e-12	2.66183e-13	aspartyl protease family protein 2
GLYMA_16G070300	mRNA	5.05464	5.46478e-05	2.33395e-05	U-box domain-containing protein 39
GLYMA_13G284700	mRNA	3.63014	8.67996e-16	1.99752e-16	uncharacterized LOC100779229
GLYMA_14G117300	mRNA	-2.35475	9.87928e-44	1.15696e-44	uncharacterized LOC100775685
GLYMA_11G033400	mRNA	2.87407	7.92635e-06	3.12418e-06	metalloendoproteinase 1-MMP
GLYMA_09G269500	mRNA	-2.81333	1.2903e-34	1.7897e-35	bifunctional dihydroflavonol 4-reductase/flavanone 4-reductase-like
GLYMA_13G150600	mRNA	-2.05667	8.71389e-08	2.95191e-08	AT-hook motif nuclear-localized protein 1
GLYMA_14G006300	mRNA	1.39121	4.90713e-11	1.37788e-11	cytochrome b561 and DOMON domain-containing protein At2g04850-like
GLYMA_04G188600	mRNA	1.23943	3.29318e-09	1.02212e-09	protein DEHYDRATION-INDUCED 19 homolog 5
GLYMA_11G023200	mRNA	1.20281	6.98573e-12	1.88248e-12	aquaporin PIP1-4
GLYMA_12G202400	mRNA	1.24548	7.16543e-19	1.47822e-19	probable protein phosphatase 2C 52
GLYMA_20G182600	mRNA	-1.01897	8.23548e-65	7.19019e-66	U-box domain-containing protein 14
GLYMA_04G151500	mRNA	-1.75179	2.14083e-103	1.25152e-104	vacuolar protein sorting-associated protein 24 homolog 1-like
GLYMA_09G051900	mRNA	-2.93404	8.8435e-43	1.05567e-43	uncharacterized LOC102669198
GLYMA_19G178200	mRNA	-1.25989	2.91852e-12	7.75167e-13	floral homeotic protein APETALA 2
GLYMA_04G165800	mRNA	-1.03282	4.88054e-05	2.07292e-05	uncharacterized LOC100797246
GLYMA_08G017000	mRNA	1.10007	1.94126e-06	7.27597e-07	uncharacterized LOC100795943
GLYMA_15G165000	mRNA	-5.28075	4.42514e-10	1.30685e-10	oxysterol-binding protein-related protein 4C
GLYMA_17G121900	mRNA	-1.80623	1.22301e-14	2.92788e-15	uncharacterized LOC100794201
GLYMA_11G140500	mRNA	-1.26634	0	0	heat shock cognate 70 kDa protein 2
GLYMA_07G133900	mRNA	-4.56887	1.19638e-79	8.7588e-81	laccase-17
GLYMA_09G148700	mRNA	2.77453	2.35376e-05	9.68717e-06	uncharacterized LOC100795947
GLYMA_17G088500	mRNA	-3.14153	9.76729e-175	3.56869e-176	triose phosphate/phosphate translocator, non-green plastid, chloroplastic
GLYMA_09G198700	mRNA	-1.04209	5.51488e-20	1.09576e-20	probable serine/threonine-protein kinase PIX13
GLYMA_17G063900	mRNA	-1.59917	7.1136e-37	9.43437e-38	AAA-ATPase At5g57480
GLYMA_09G058800	mRNA	-1.29113	5.68518e-08	1.90359e-08	oxysterol-binding protein-related protein 4B
GLYMA_09G266000	mRNA	-1.88526	8.54899e-14	2.12378e-14	subtilisin-like protease SBT4.14
GLYMA_06G265500	mRNA	-2.62231	3.06994e-94	1.96711e-95	scarecrow-like protein 21
GLYMA_04G065000	mRNA	-1.68191	7.34338e-07	2.66494e-07	topless-related protein 1
GLYMA_13G088000	mRNA	1.55214	3.31213e-07	1.17051e-07	probable beta-D-xylosidase 7
GLYMA_13G115400	mRNA	-1.71122	0	0	pectinesterase/pectinesterase inhibitor PPE8B
GLYMA_11G113500	mRNA	-1.02791	1.49551e-12	3.92481e-13	cysteine protease RD19A
GLYMA_13G113000.1	mRNA	-3.46016	7.60823e-35	1.05032e-35	putative multidrug resistance protein
GLYMA_18G002800	mRNA	-1.30358	0	0	selenium-binding protein 1
GLYMA_18G202400	mRNA	-3.81418	2.27864e-12	6.022e-13	trihelix transcription factor GT-3b
GLYMA_14G096600	mRNA	-1.07589	0.000594893	0.000283959	beta-fructofuranosidase, insoluble isoenzyme CWINV6
GLYMA_05G151200	mRNA	1.07387	2.63852e-41	3.22018e-42	long-chain acyl-CoA synthetase ACSL2
GLYMA_15G167800	mRNA	-1.60577	1.14073e-47	1.25285e-48	plant intracellular Ras-group-related LRR protein 6
GLYMA_07G003800	mRNA	1.67922	3.17786e-49	3.41485e-50	probable xyloglucan glycosyltransferase 5
GLYMA_13G095800	mRNA	-2.05074	6.07122e-10	1.80622e-10	beta-1,3-galactosyltransferase 6
GLYMA_19G008500	mRNA	-2.73416	3.08833e-123	1.55027e-124	2-methylene-furan-3-one reductase
GLYMA_05G026900	mRNA	-1.0603	3.5852e-14	8.75894e-15	mini zinc finger protein 3
GLYMA_20G020200	mRNA	-1.65901	1.02341e-12	2.66576e-13	TMV resistance protein N
GLYMA_12G025600	mRNA	-1.43721	4.5133e-07	1.61162e-07	serine carboxypeptidase-like 34
GLYMA_19G091800	mRNA	-1.64879	8.16201e-123	4.10827e-124	peroxidase 55
GLYMA_08G149600	mRNA	-1.04274	2.27848e-59	2.12286e-60	hyphally regulated cell wall protein 1
GLYMA_14G081100	mRNA	-1.81485	1.08537e-134	5.03989e-136	uncharacterized LOC100775692
GLYMA_14G082100	mRNA	1.51738	0.000571475	0.000272243	origin of replication complex subunit 2
GLYMA_13G178700	mRNA	3.55214	1.6334e-12	4.29427e-13	non-classical arabinogalactan protein 31
GLYMA_06G319600	mRNA	-1.45428	3.64784e-06	1.39757e-06	leucine-rich repeat protein FLOR 1
GLYMA_05G186000	mRNA	-1.18663	1.73078e-05	7.03472e-06	TSL-kinase interacting protein 1-like
GLYMA_07G043100	mRNA	-1.00243	5.68909e-209	1.7839e-210	dnaJ homolog subfamily B member 9
GLYMA_04G017200	mRNA	-3.07385	1.75319e-19	3.54368e-20	probable serine/threonine-protein kinase PIX13
GLYMA_08G093600	mRNA	-3.49589	1.88359e-229	5.3773e-231	purple acid phosphatase 7
GLYMA_04G212000	mRNA	-5.03282	7.72001e-05	3.34418e-05	NAC transcription factor 25
GLYMA_18G301500	mRNA	-1.17939	4.72838e-57	4.54982e-58	NAC domain-containing protein
GLYMA_15G051200	mRNA	2.34569	0.000227434	0.000103503	NAC domain-containing protein 104
GLYMA_08G110000	mRNA	1.23021	0.000375417	0.000175036	protein ECERIFERUM 26
GLYMA_04G067200	mRNA	1.46604	4.70001e-07	1.6806e-07	ethylene-responsive transcription factor SHINE 2
GLYMA_01G105600	mRNA	-2.08345	1.45297e-07	5.00171e-08	uncharacterized LOC100775733
GLYMA_19G229900	mRNA	-1.20791	0.00012047	5.32566e-05	GATA transcription factor 17
GLYMA_08G197700	mRNA	-2.06072	7.43741e-15	1.76531e-15	probable LRR receptor-like serine/threonine-protein kinase At1g51880
GLYMA_01G134600	mRNA	-4.24397	5.8924e-94	3.78206e-95	glycinol 2-dimethylallyl transferase
GLYMA_11G155800	mRNA	1.10461	4.41225e-10	1.3028e-10	photosystem I reaction center subunit VI, chloroplastic
GLYMA_18G199000	mRNA	-1.78946	2.09906e-262	5.27699e-264	MDIS1-interacting receptor like kinase 2
GLYMA_02G213500	mRNA	-1.60789	3.93759e-103	2.30618e-104	AT-hook motif nuclear-localized protein 28
GLYMA_10G216400	mRNA	1.14879	2.34757e-05	9.65911e-06	NAC domain-containing protein 30
GLYMA_16G216100	mRNA	-1.08842	4.09111e-249	1.07646e-250	eukaryotic peptide chain release factor subunit 1-3
GLYMA_16G095800	mRNA	-1.39062	5.27849e-22	9.85606e-23	probable beta-1,4-xylosyltransferase IRX14
GLYMA_12G192800	mRNA	1.16881	1.11463e-08	3.57593e-09	L-ascorbate oxidase homolog
GLYMA_18G256900	mRNA	-1.58512	3.73689e-31	5.59999e-32	polyvinylalcohol dehydrogenase
GLYMA_18G031400	mRNA	1.523	1.74266e-11	4.78322e-12	lectin-like protein
GLYMA_08G018300	mRNA	-2.73584	6.9179e-44	8.0789e-45	probable WRKY transcription factor 29
GLYMA_19G259400	mRNA	3.02607	3.0569e-05	1.2721e-05	probable L-gulonolactone oxidase 4
GLYMA_09G115300	mRNA	1.14072	1.14642e-14	2.7411e-15	probable leucine-rich repeat receptor-like protein kinase At1g68400
GLYMA_15G146800	mRNA	2.54911	8.91423e-133	4.19279e-134	probable polygalacturonase
GLYMA_13G160400	mRNA	3.82349	0	0	36.4 kDa proline-rich protein-like
GLYMA_16G175300	mRNA	-2.28453	0	0	isoflavone 7-O-glucosyltransferase
GLYMA_09G054100	mRNA	-1.32945	9.77467e-24	1.73905e-24	uncharacterized LOC100811044
GLYMA_07G019800	mRNA	1.58117	1.77615e-38	2.28248e-39	rop guanine nucleotide exchange factor 12
GLYMA_19G181000	mRNA	1.04912	4.5624e-46	5.15144e-47	uncharacterized LOC100806816
GLYMA_06G276800	mRNA	-1.14079	5.68159e-69	4.71568e-70	uncharacterized LOC100812760
GLYMA_20G232900	mRNA	1.78183	1.40482e-254	3.63894e-256	amidase 1
GLYMA_12G191700	mRNA	-3.31934	1.37788e-178	4.92167e-180	cellulose synthase-like protein B5
GLYMA_17G032300	mRNA	1.27577	0.000922777	0.00045101	uncharacterized LOC112999961
GLYMA_03G090500	mRNA	-1.98381	2.45766e-88	1.66725e-89	G-type lectin S-receptor-like serine/threonine-protein kinase LECRK3
GLYMA_18G229300	mRNA	-1.05566	1.09848e-16	2.44497e-17	NAD-dependent malic enzyme 59 kDa isoform, mitochondrial
GLYMA_20G241500	mRNA	-1.8237	3.87315e-155	1.58411e-156	chalcone--flavonone isomerase 1A
[truncated: 4,645 more rows]
